# Supplementary material
Source: ML conference proceedings conference paper supplement (https://openaccess.thecvf.com/content/CVPR2025/html/Serianni_Attention_IoU_Examining_CVPR_2025_paper.html)
Supplement: Supplementary file 4 [file Serianni_Attention_IoU_Examining_CVPR_2025_supplemental.zip]

GradCAM - Target: all / Arched\_Eyebrows, Subset: all
