# Supplementary material
Source: ML conference proceedings conference paper supplement (https://openaccess.thecvf.com/content/CVPR2025/html/Serianni_Attention_IoU_Examining_CVPR_2025_paper.html)

GradCAM - Target: all / Male, Subset: all

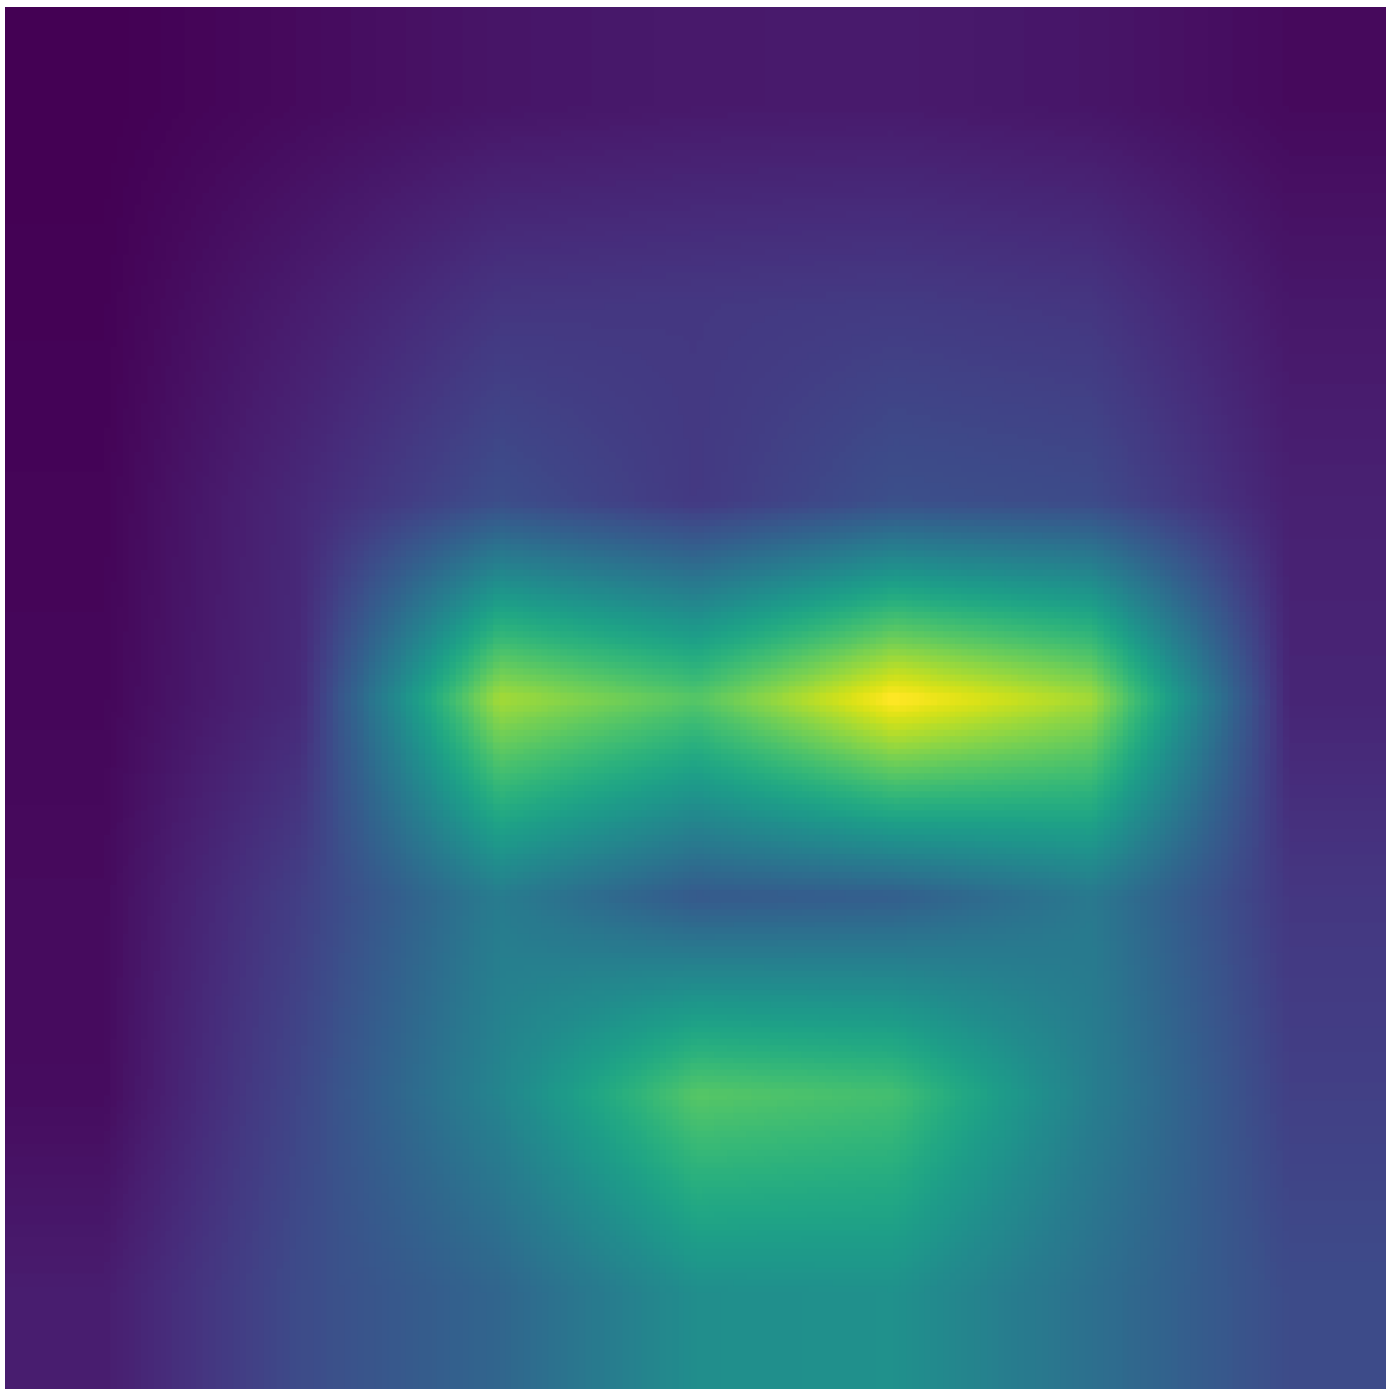

Supplement: Supplementary file 2 [file Serianni_Attention_IoU_Examining_CVPR_2025_supplemental.zip]

GradCAM - Target: all / Pale\_Skin, Subset: all

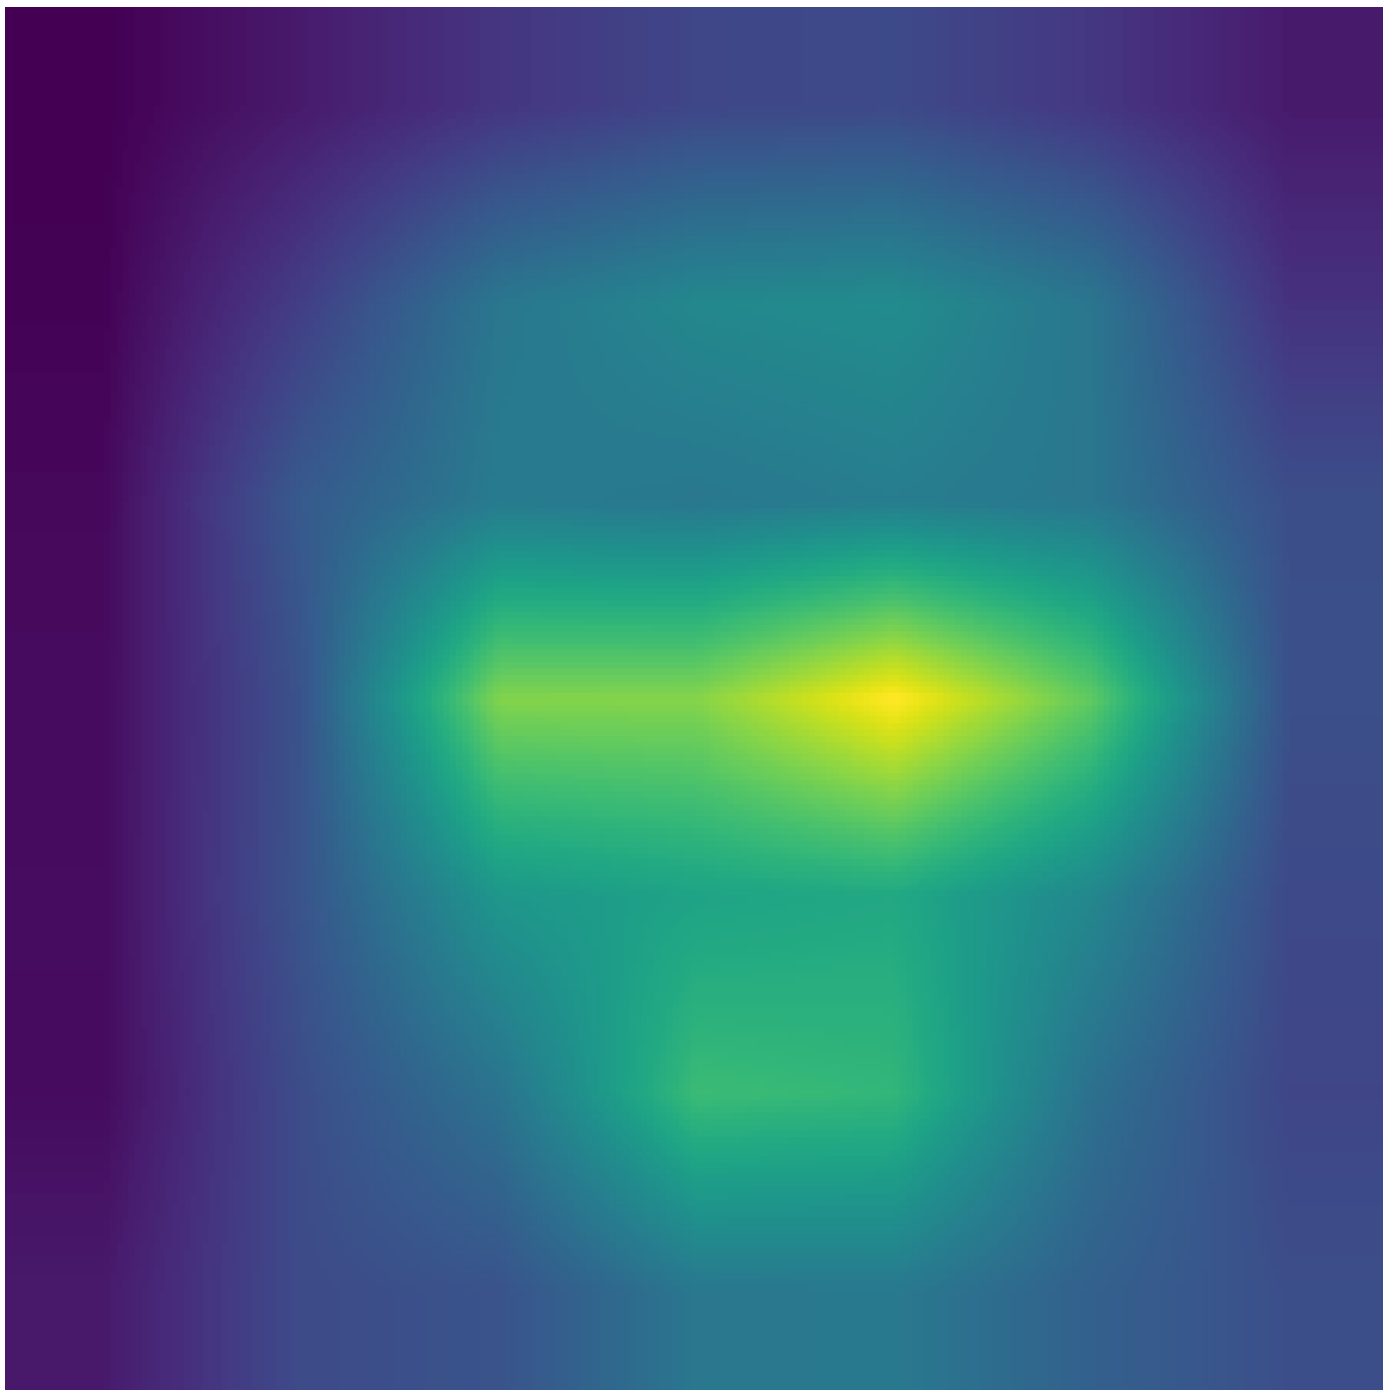

Supplement: Supplementary file 3 [file Serianni_Attention_IoU_Examining_CVPR_2025_supplemental.zip]

GradCAM - Target: all / High\_Cheekbones, Subset: all

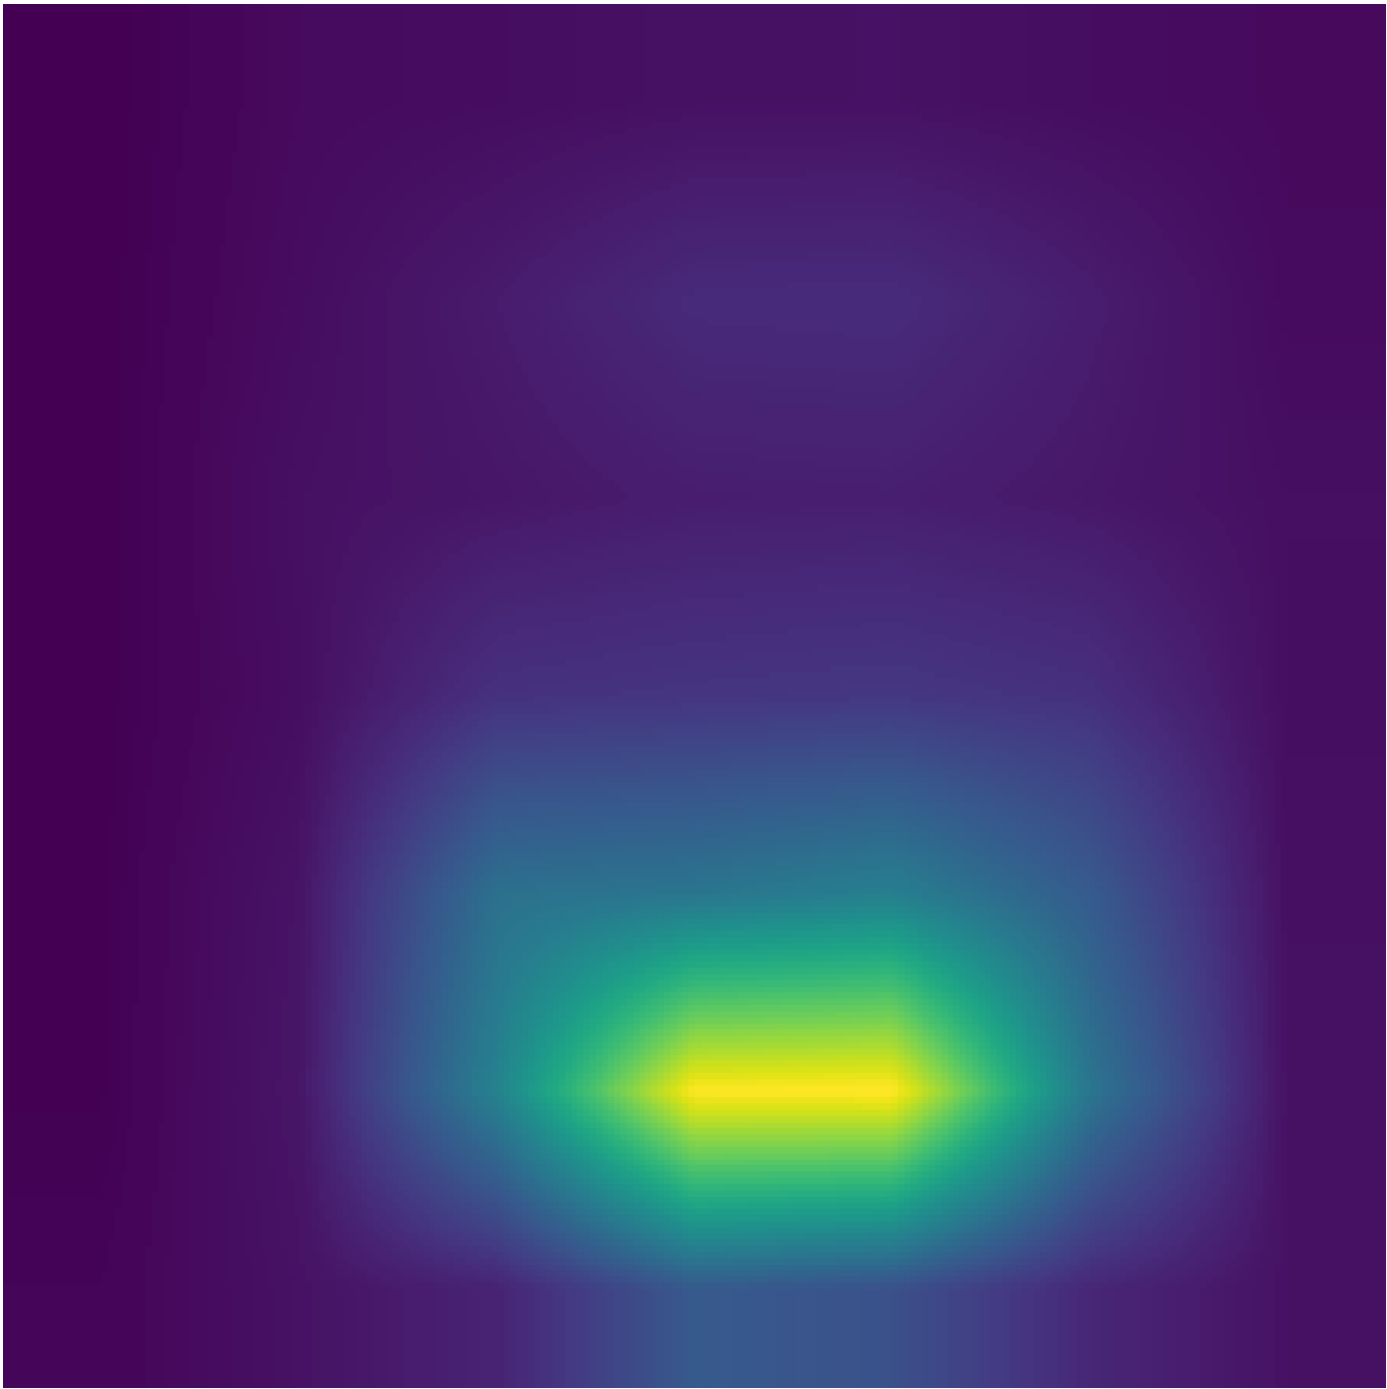

Supplement: Supplementary file 5 [file Serianni_Attention_IoU_Examining_CVPR_2025_supplemental.zip]

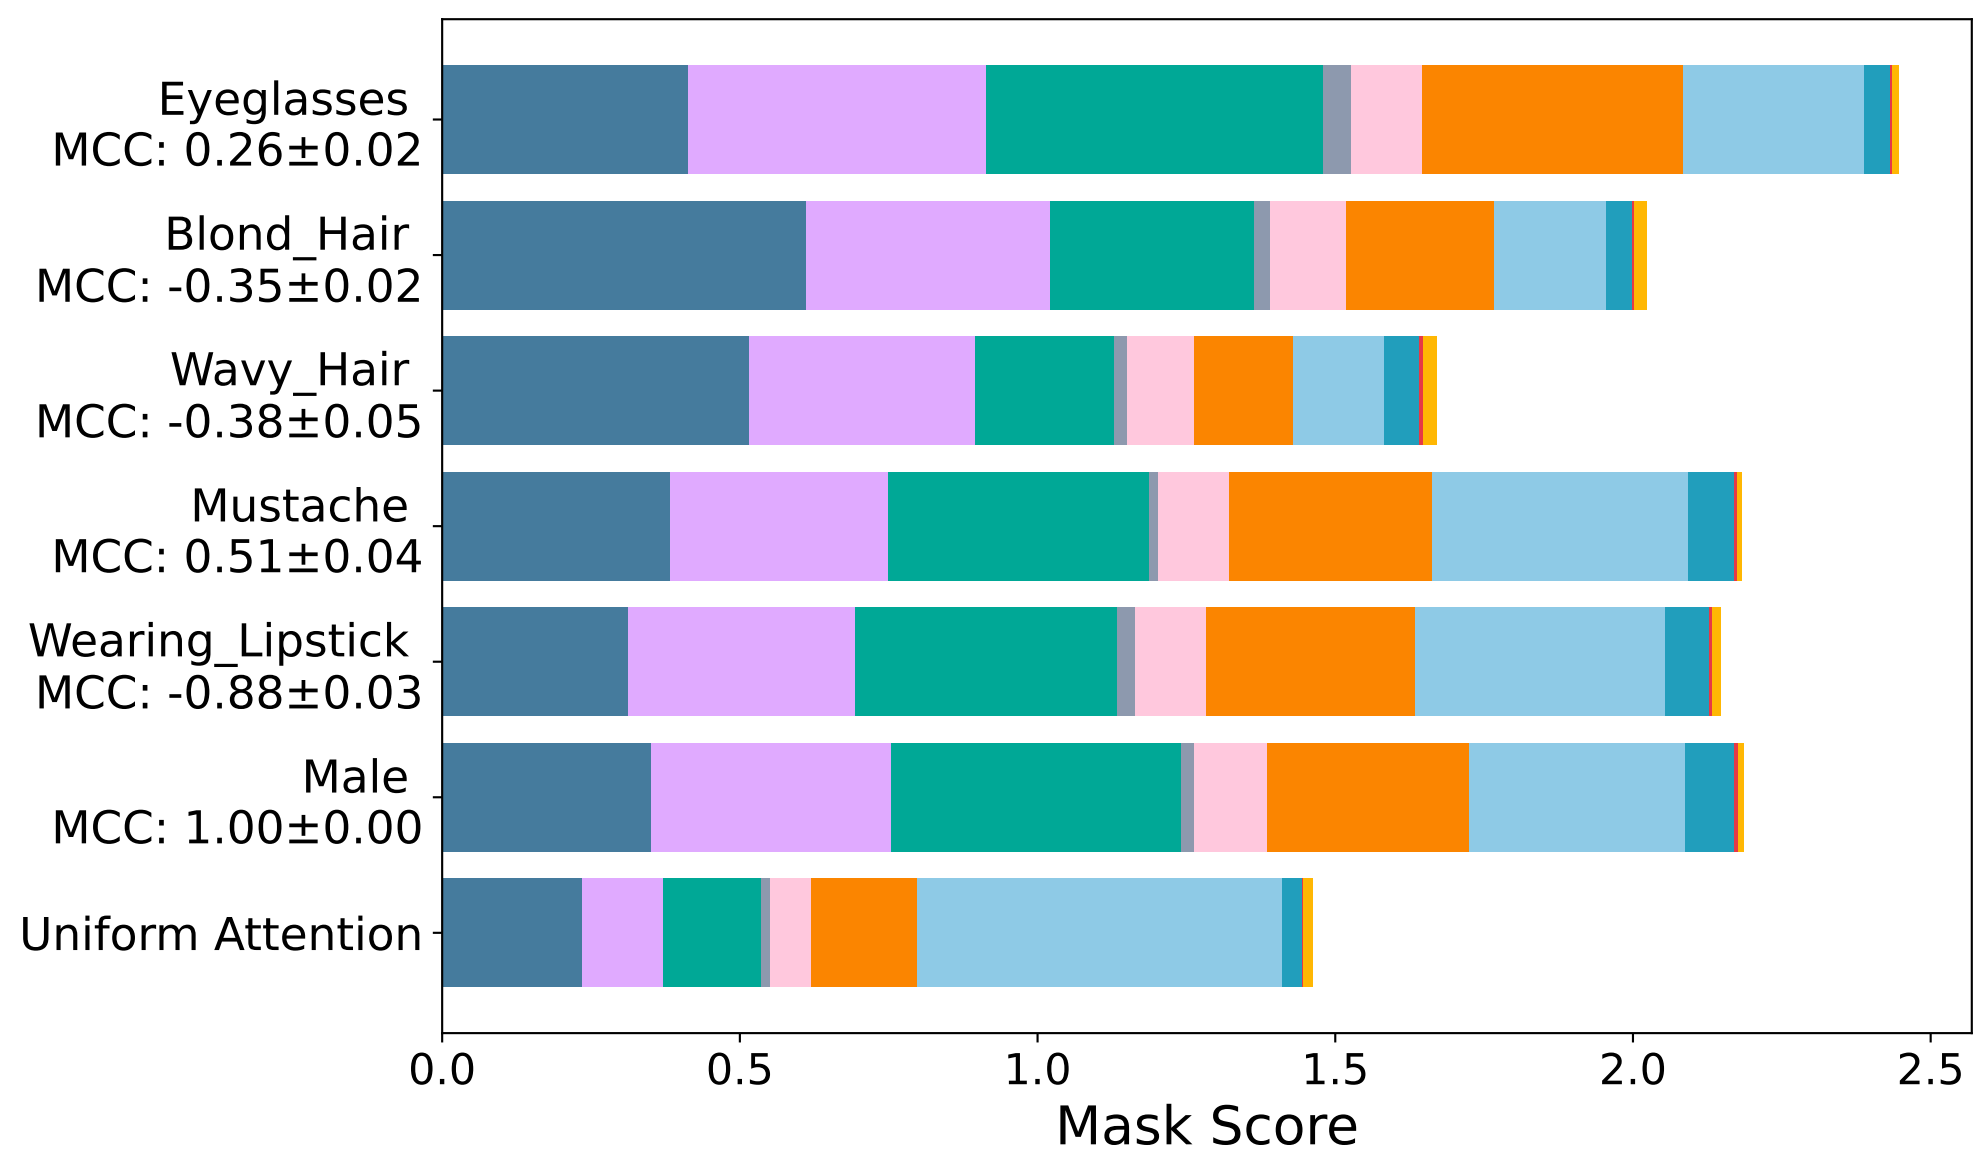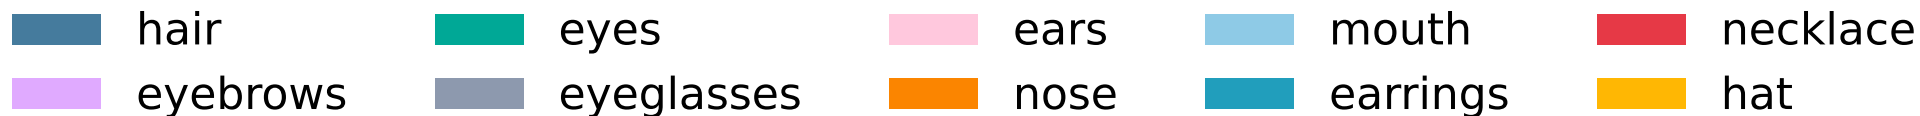

Supplement: Supplementary file 6 [file Serianni_Attention_IoU_Examining_CVPR_2025_supplemental.zip]

GradCAM - Target: all / Wavy\_Hair, Subset: all

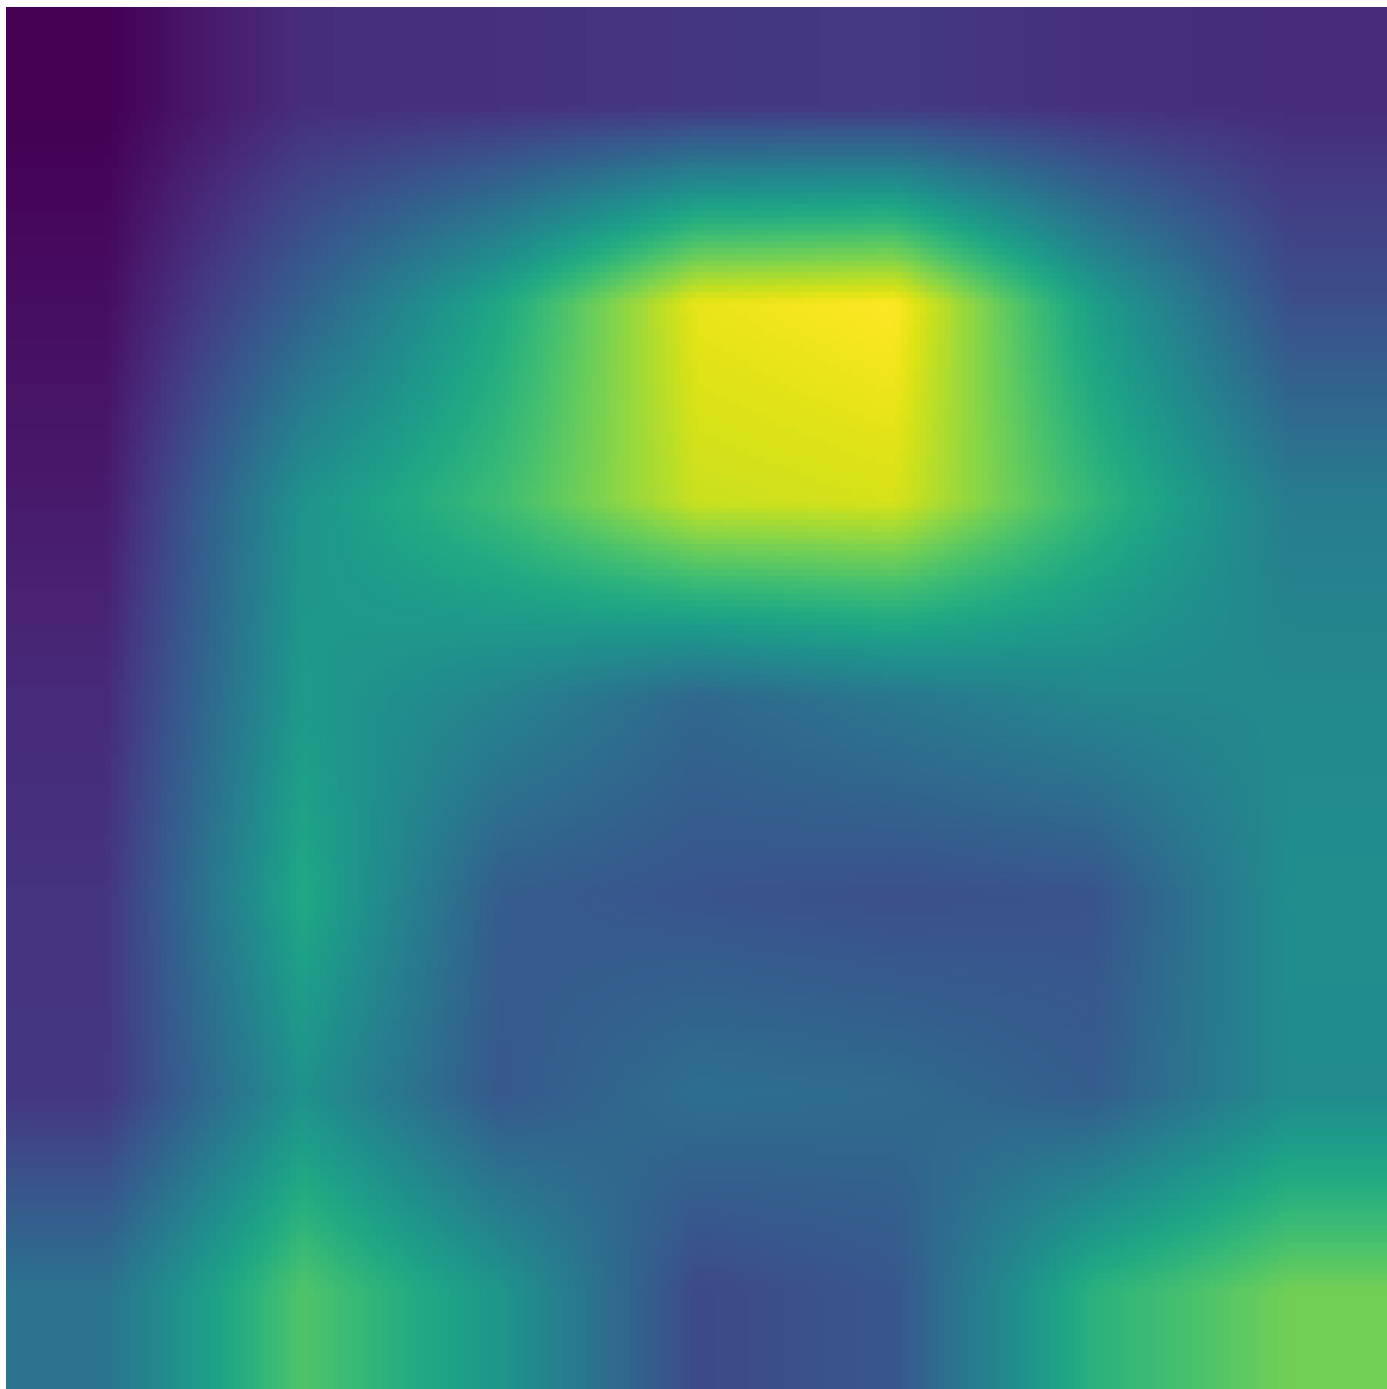

Supplement: Supplementary file 7 [file Serianni_Attention_IoU_Examining_CVPR_2025_supplemental.zip]

GradCAM - Target: all / Arched\_Eyebrows, Subset: all

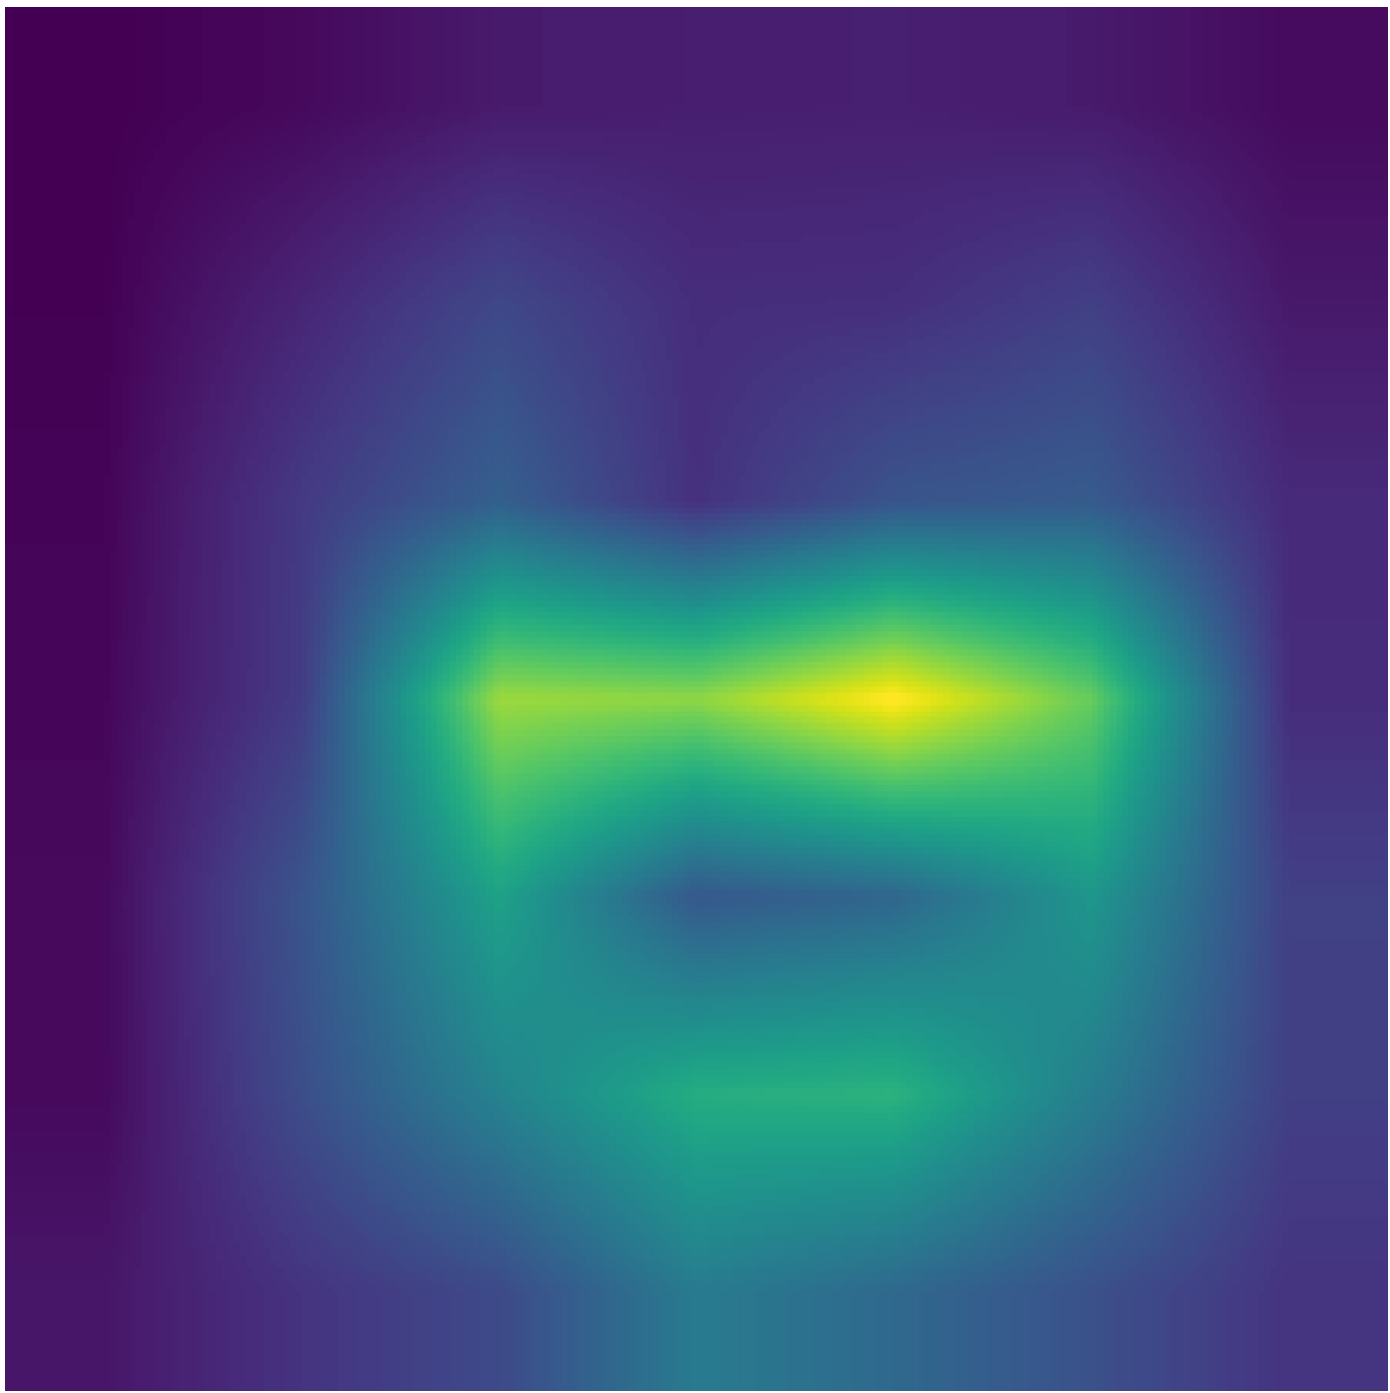

Supplement: Supplementary file 8 [file Serianni_Attention_IoU_Examining_CVPR_2025_supplemental.zip]

Worst Group Accuracy

Mask Score

- hair
- eyebrows
- eyes
- nose
- mouth

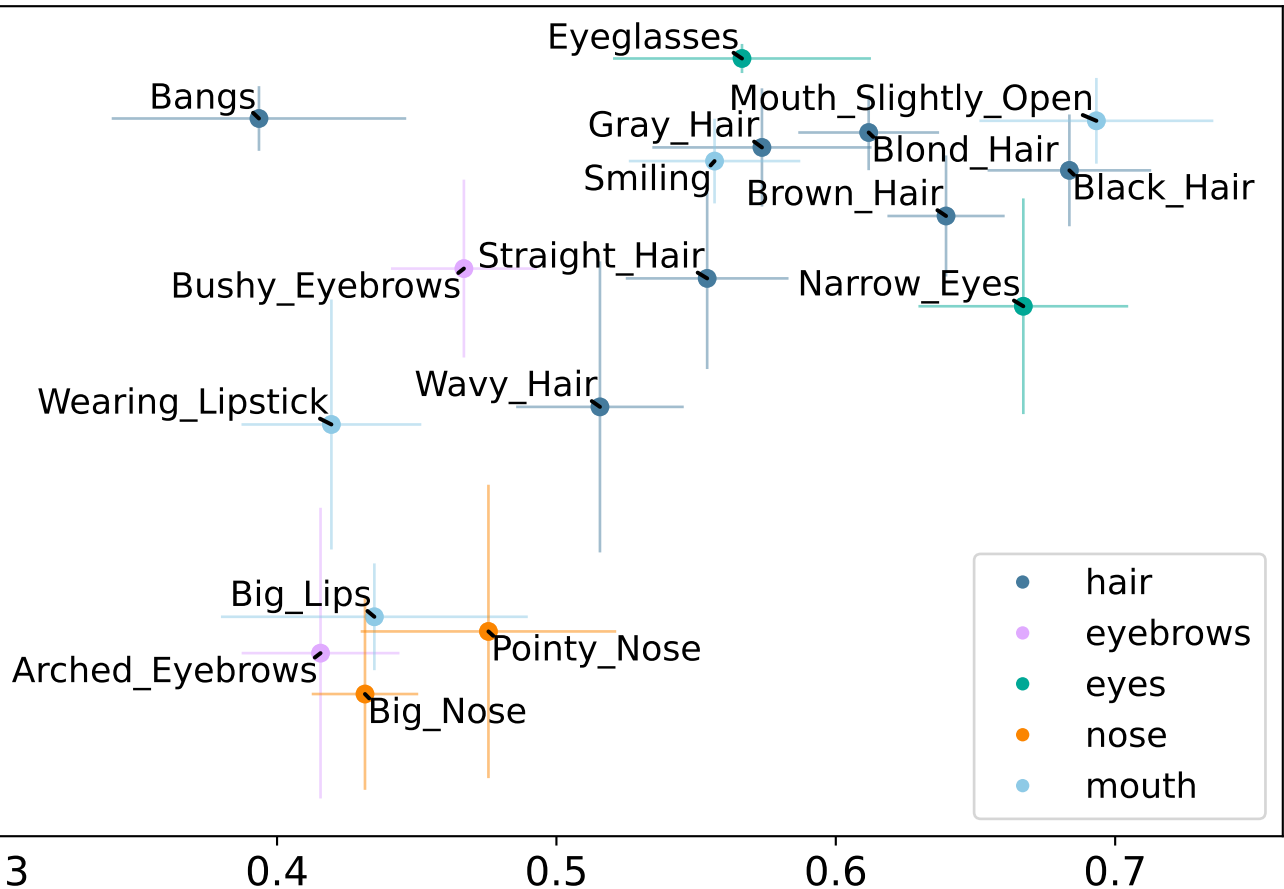

Supplement: Supplementary file 9 [file Serianni_Attention_IoU_Examining_CVPR_2025_supplemental.zip]

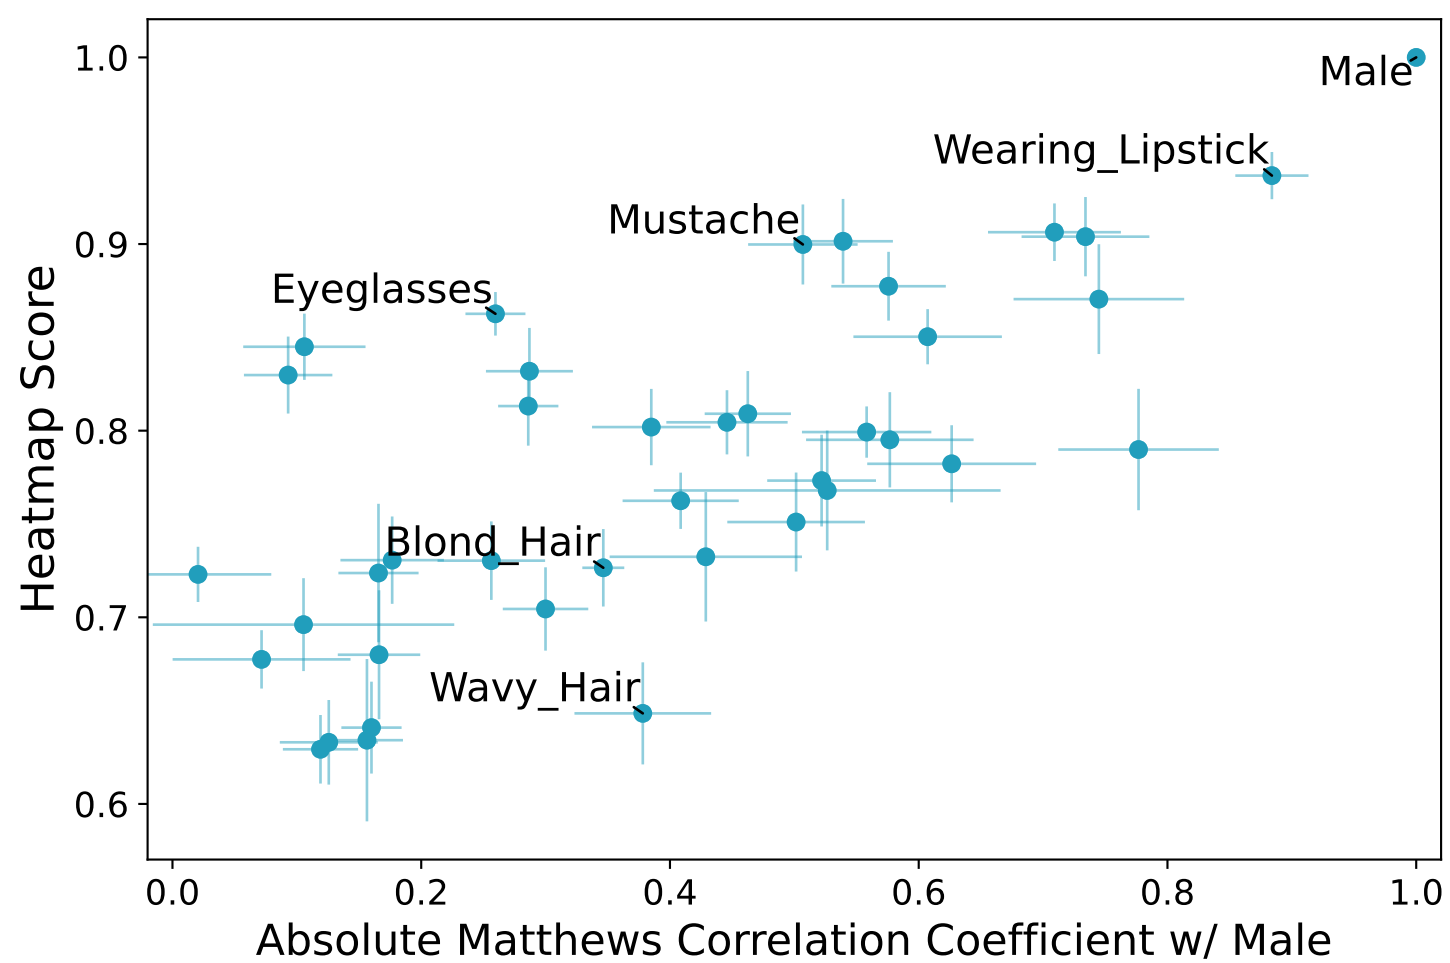

Supplement: Supplementary file 10 [file Serianni_Attention_IoU_Examining_CVPR_2025_supplemental.zip]

GradCAM - Target: all / Wearing\_Necklace, Subset: all

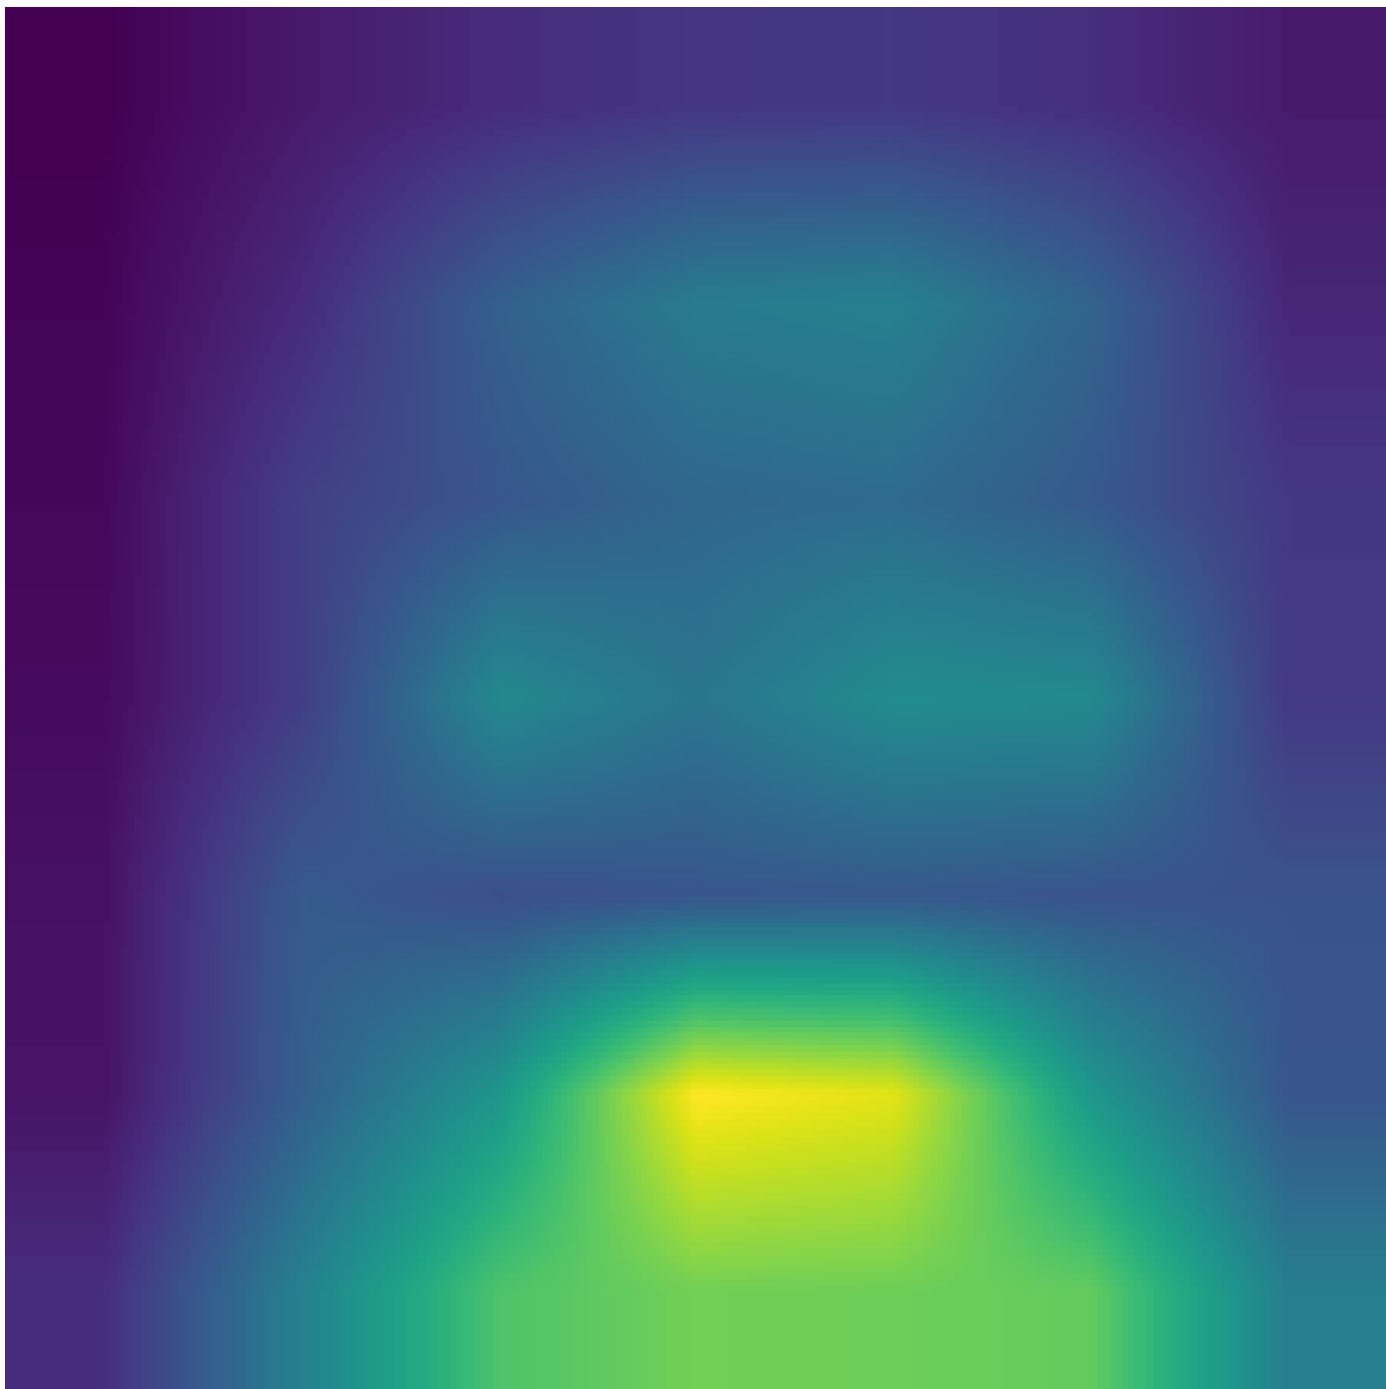

Supplement: Supplementary file 11 [file Serianni_Attention_IoU_Examining_CVPR_2025_supplemental.zip]

GradCAM - Target: all / Bald, Subset: all

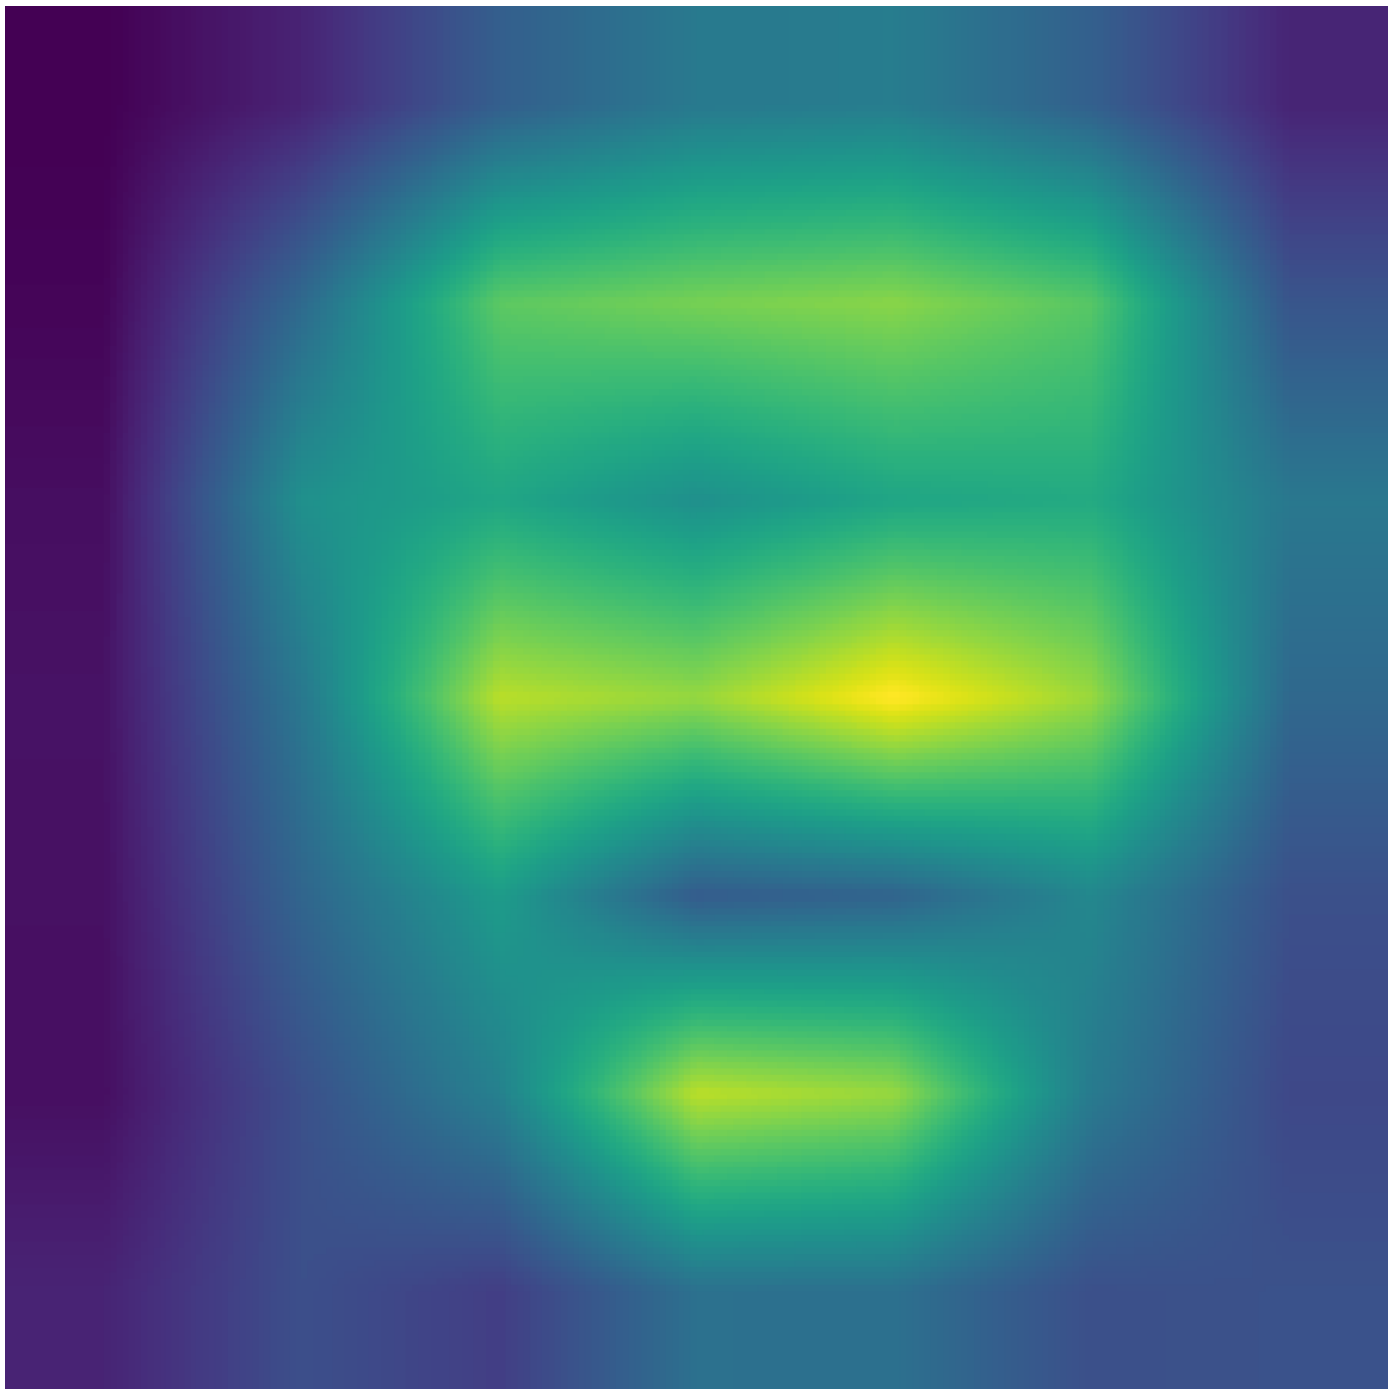

Supplement: Supplementary file 12 [file Serianni_Attention_IoU_Examining_CVPR_2025_supplemental.zip]

GradCAM - Target: all / Arched\_Eyebrows, Subset: all

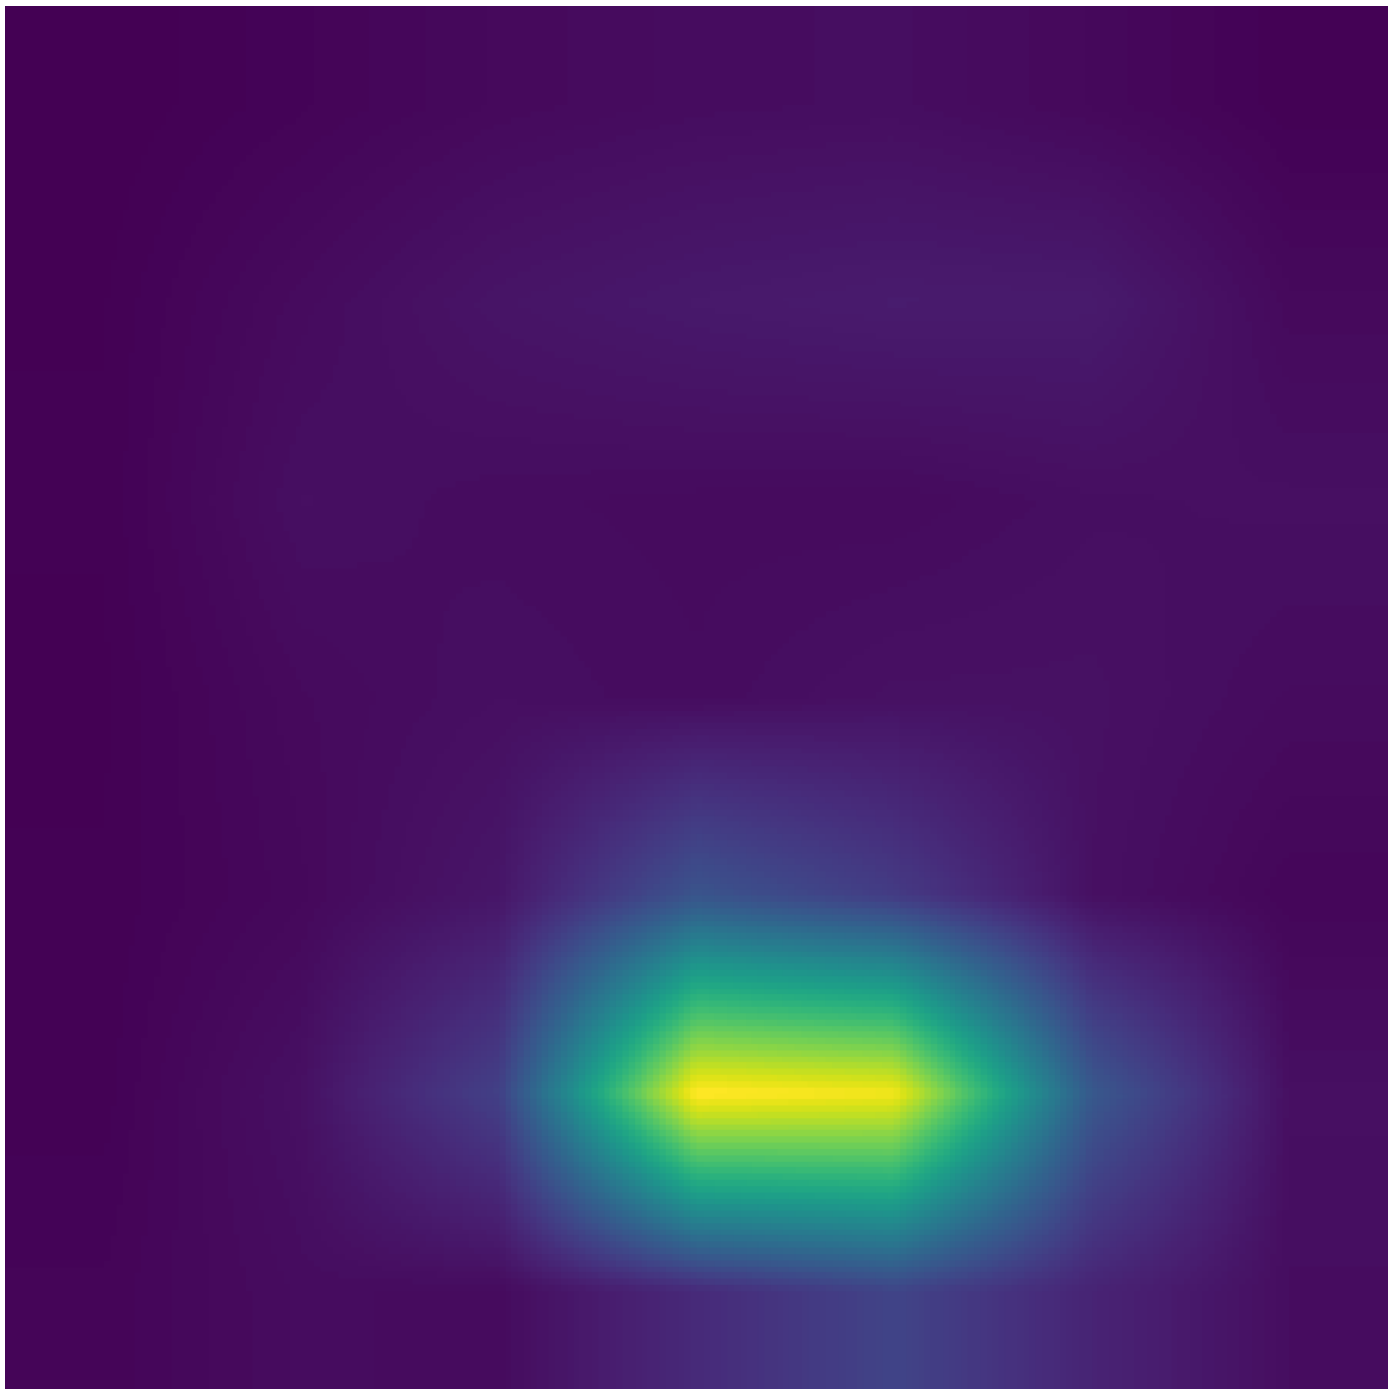

Supplement: Supplementary file 13 [file Serianni_Attention_IoU_Examining_CVPR_2025_supplemental.zip]

GradCAM - Target: all / Blurry, Subset: all

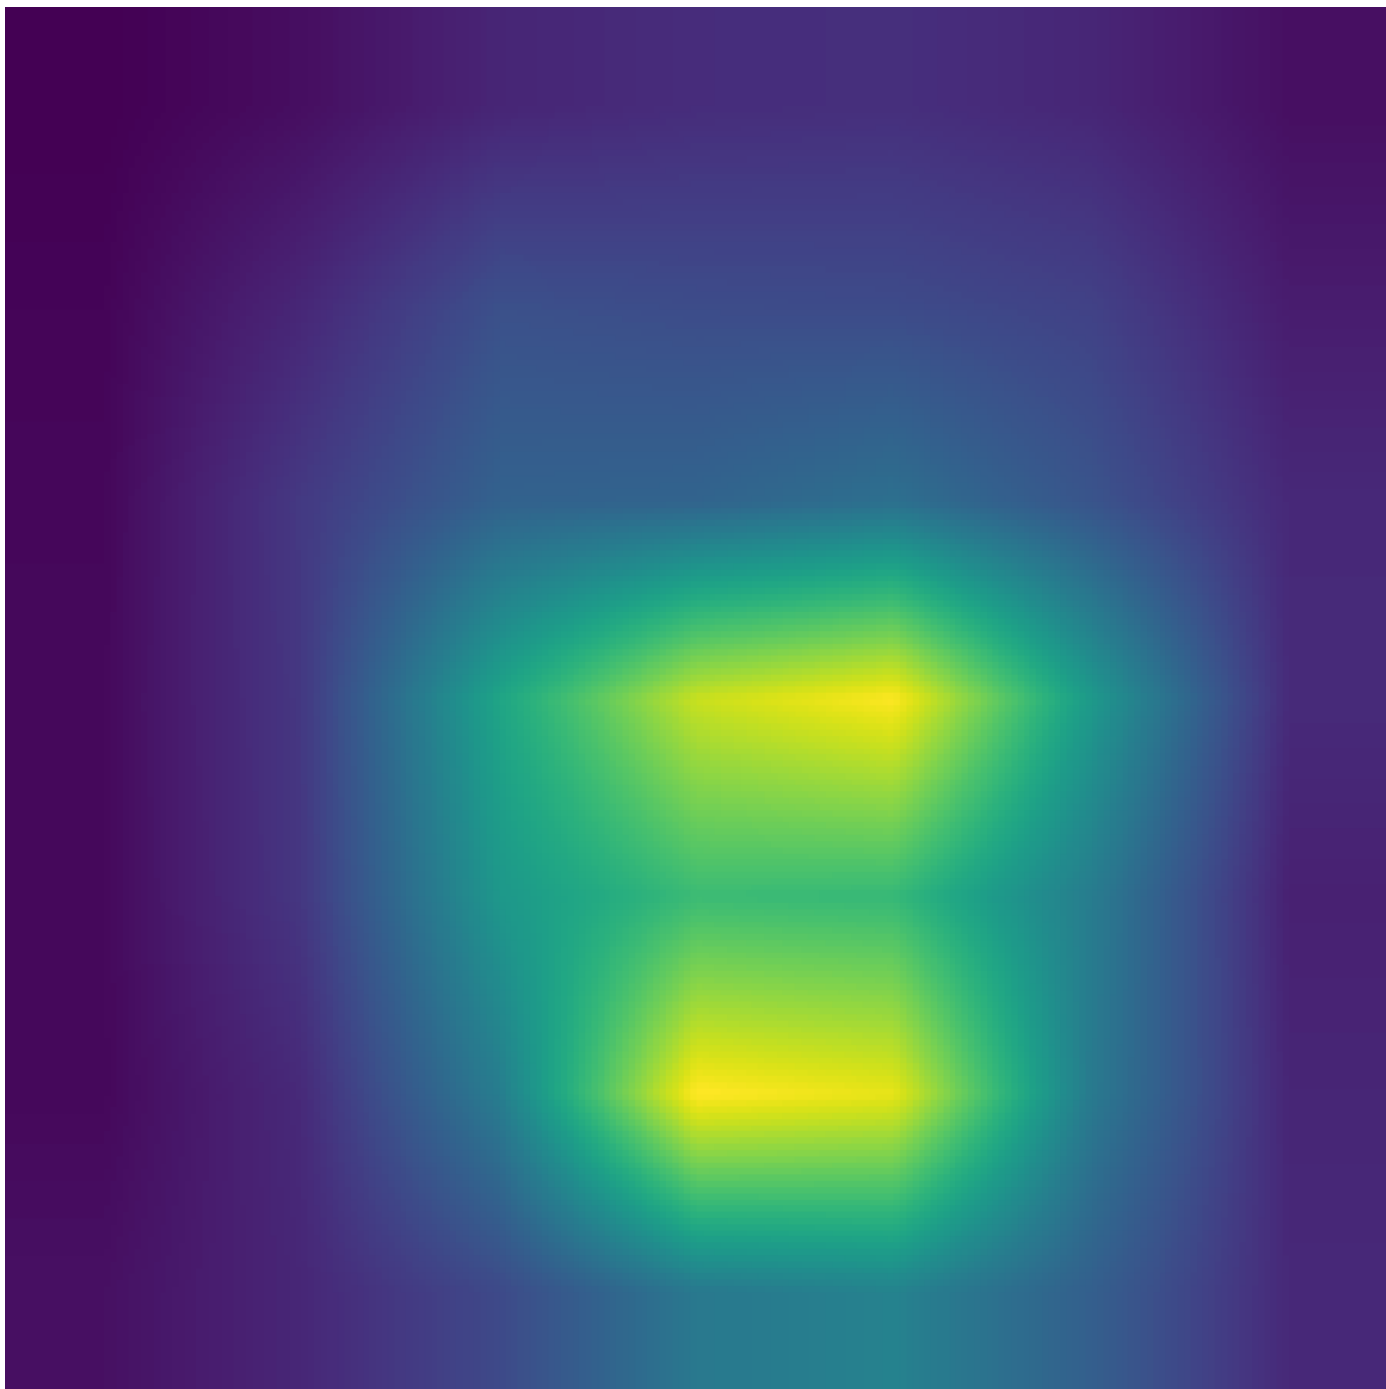

Supplement: Supplementary file 14 [file Serianni_Attention_IoU_Examining_CVPR_2025_supplemental.zip]

Heatmap Score

0.76  
0.74  
0.72  
0.70  
0.68  
0.66

-0.40

-0.35

-0.30

-0.25

Absolute MCC

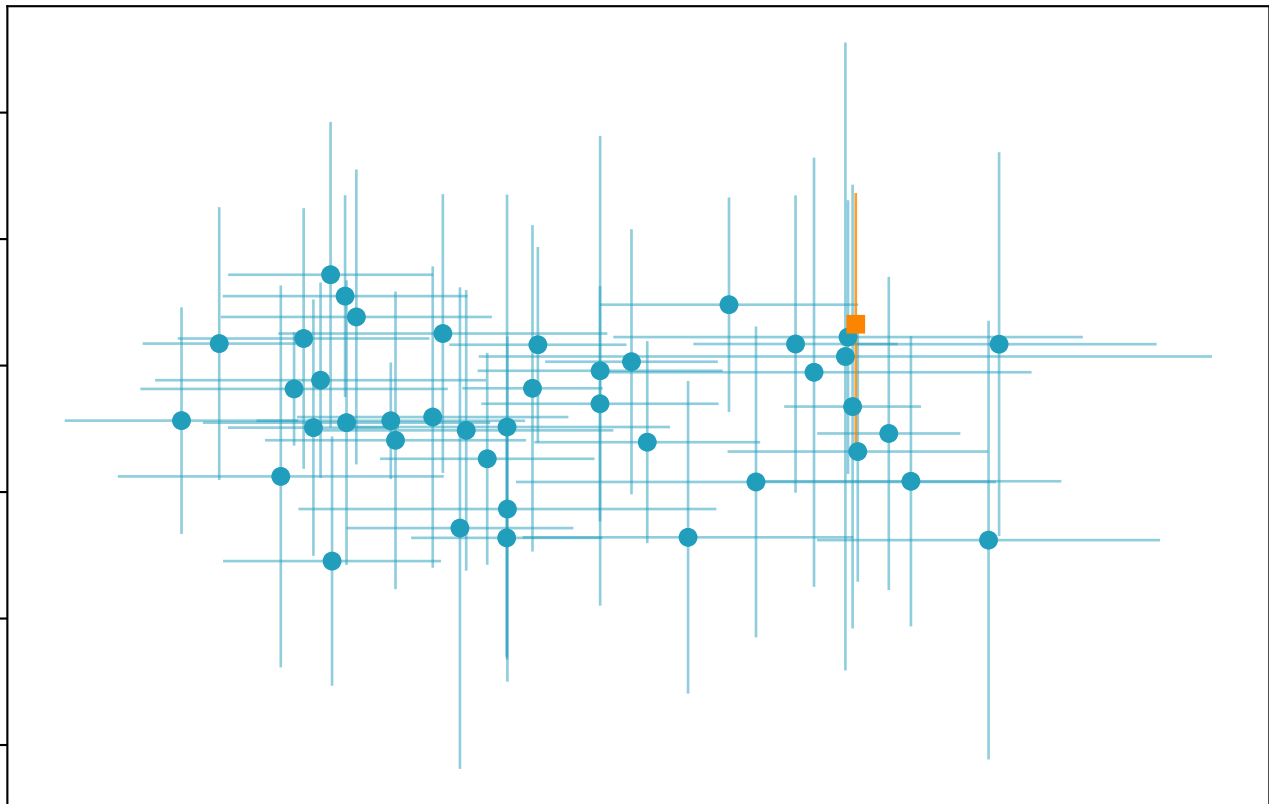

Supplement: Supplementary file 15 [file Serianni_Attention_IoU_Examining_CVPR_2025_supplemental.zip]

GradCAM - Target: all / Goatee, Subset: all

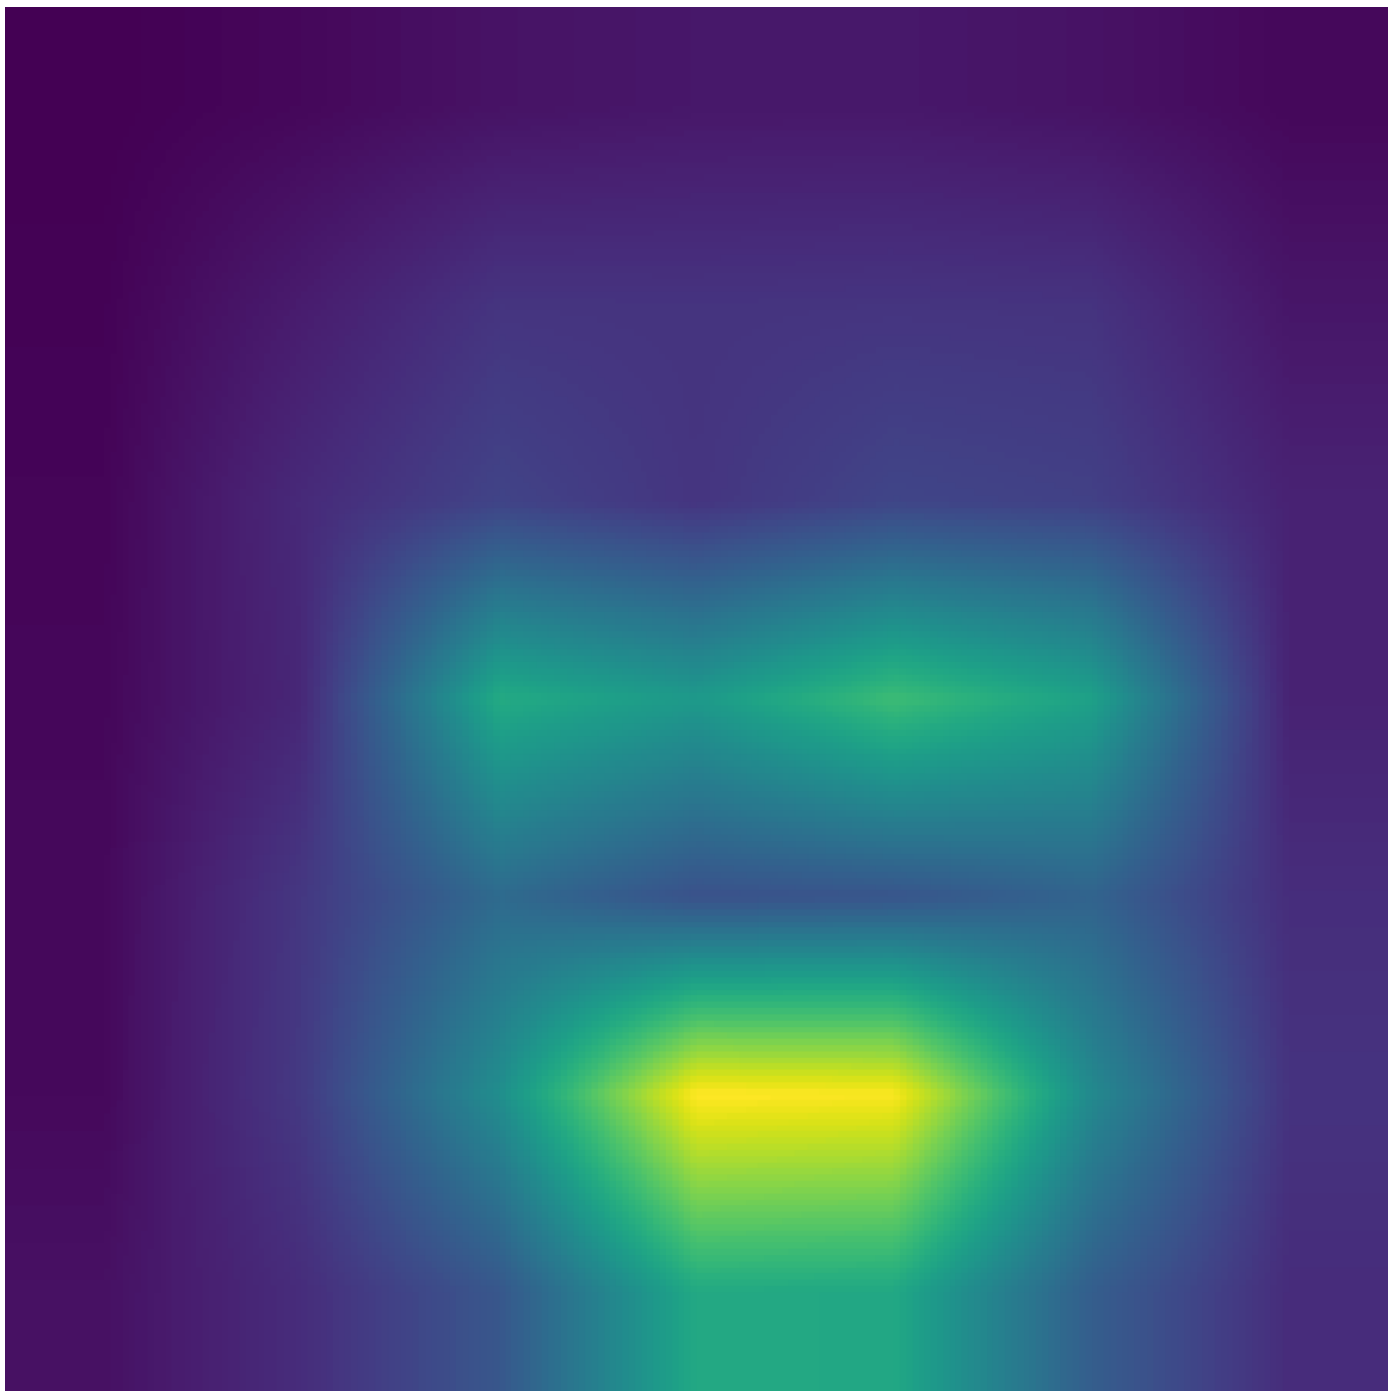

Supplement: Supplementary file 16 [file Serianni_Attention_IoU_Examining_CVPR_2025_supplemental.zip]

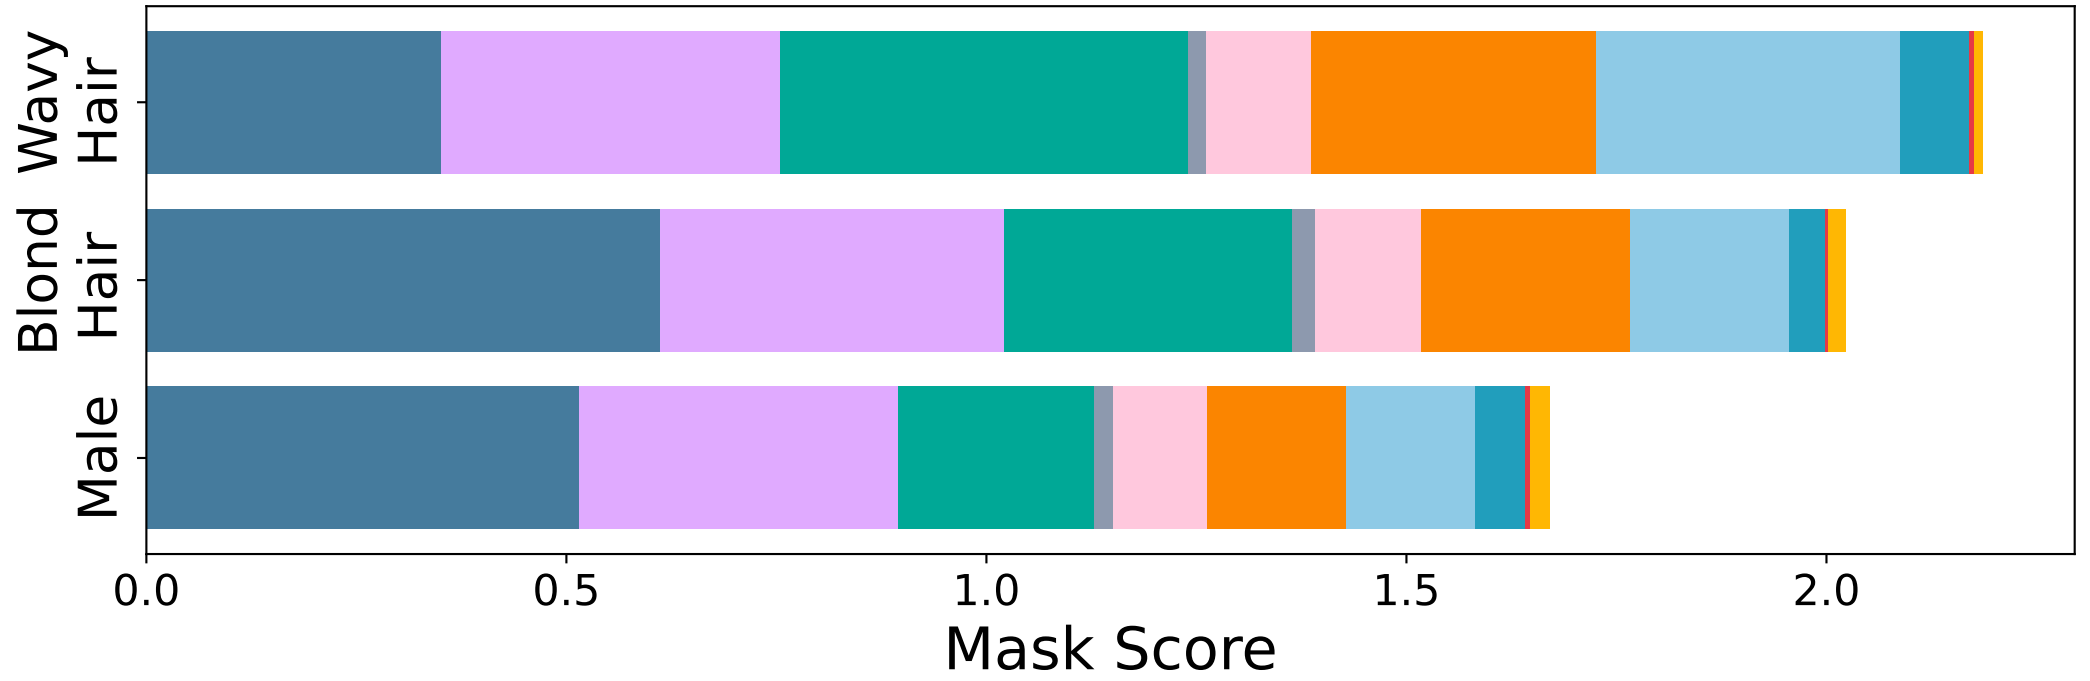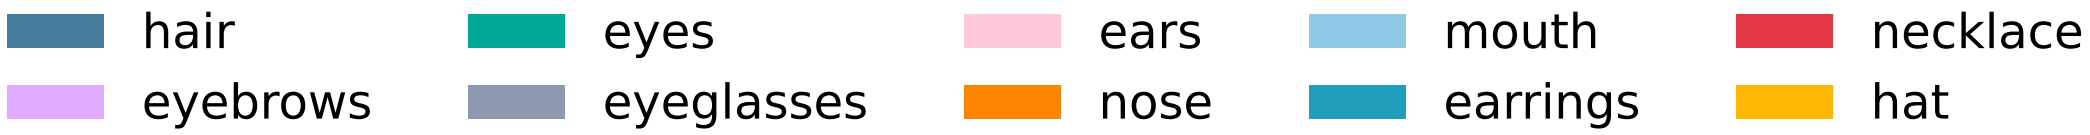

Supplement: Supplementary file 17 [file Serianni_Attention_IoU_Examining_CVPR_2025_supplemental.zip]

GradCAM - Target: all / Arched\_Eyebrows, Subset: all

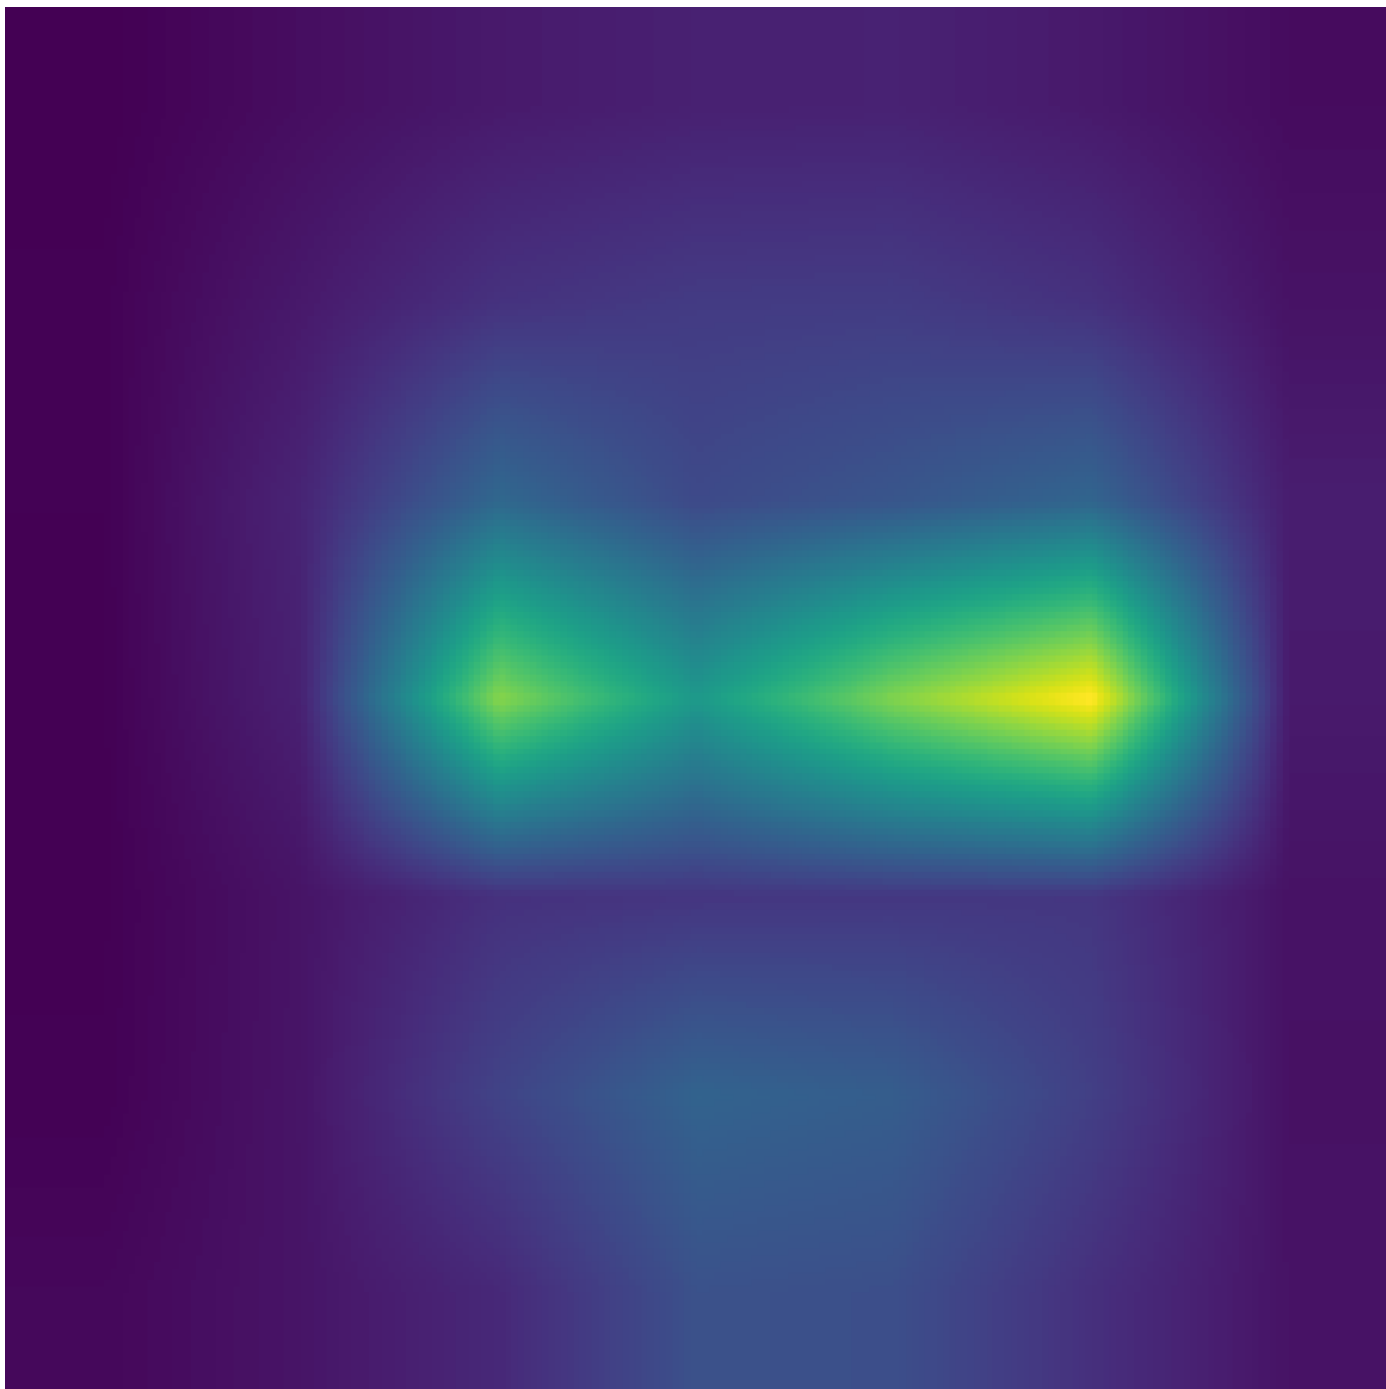

Supplement: Supplementary file 18 [file Serianni_Attention_IoU_Examining_CVPR_2025_supplemental.zip]

# Blond\_Hair and Male

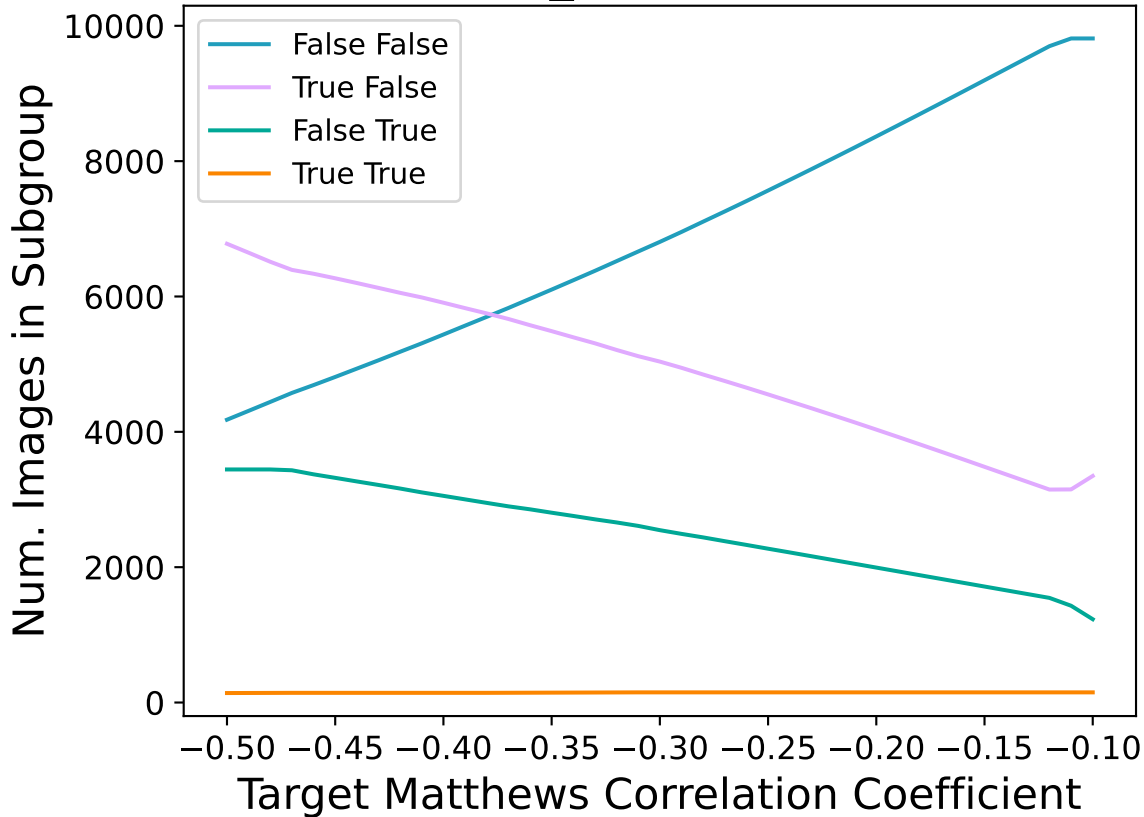

Supplement: Supplementary file 19 [file Serianni_Attention_IoU_Examining_CVPR_2025_supplemental.zip]

GradCAM - Target: all / Chubby, Subset: all

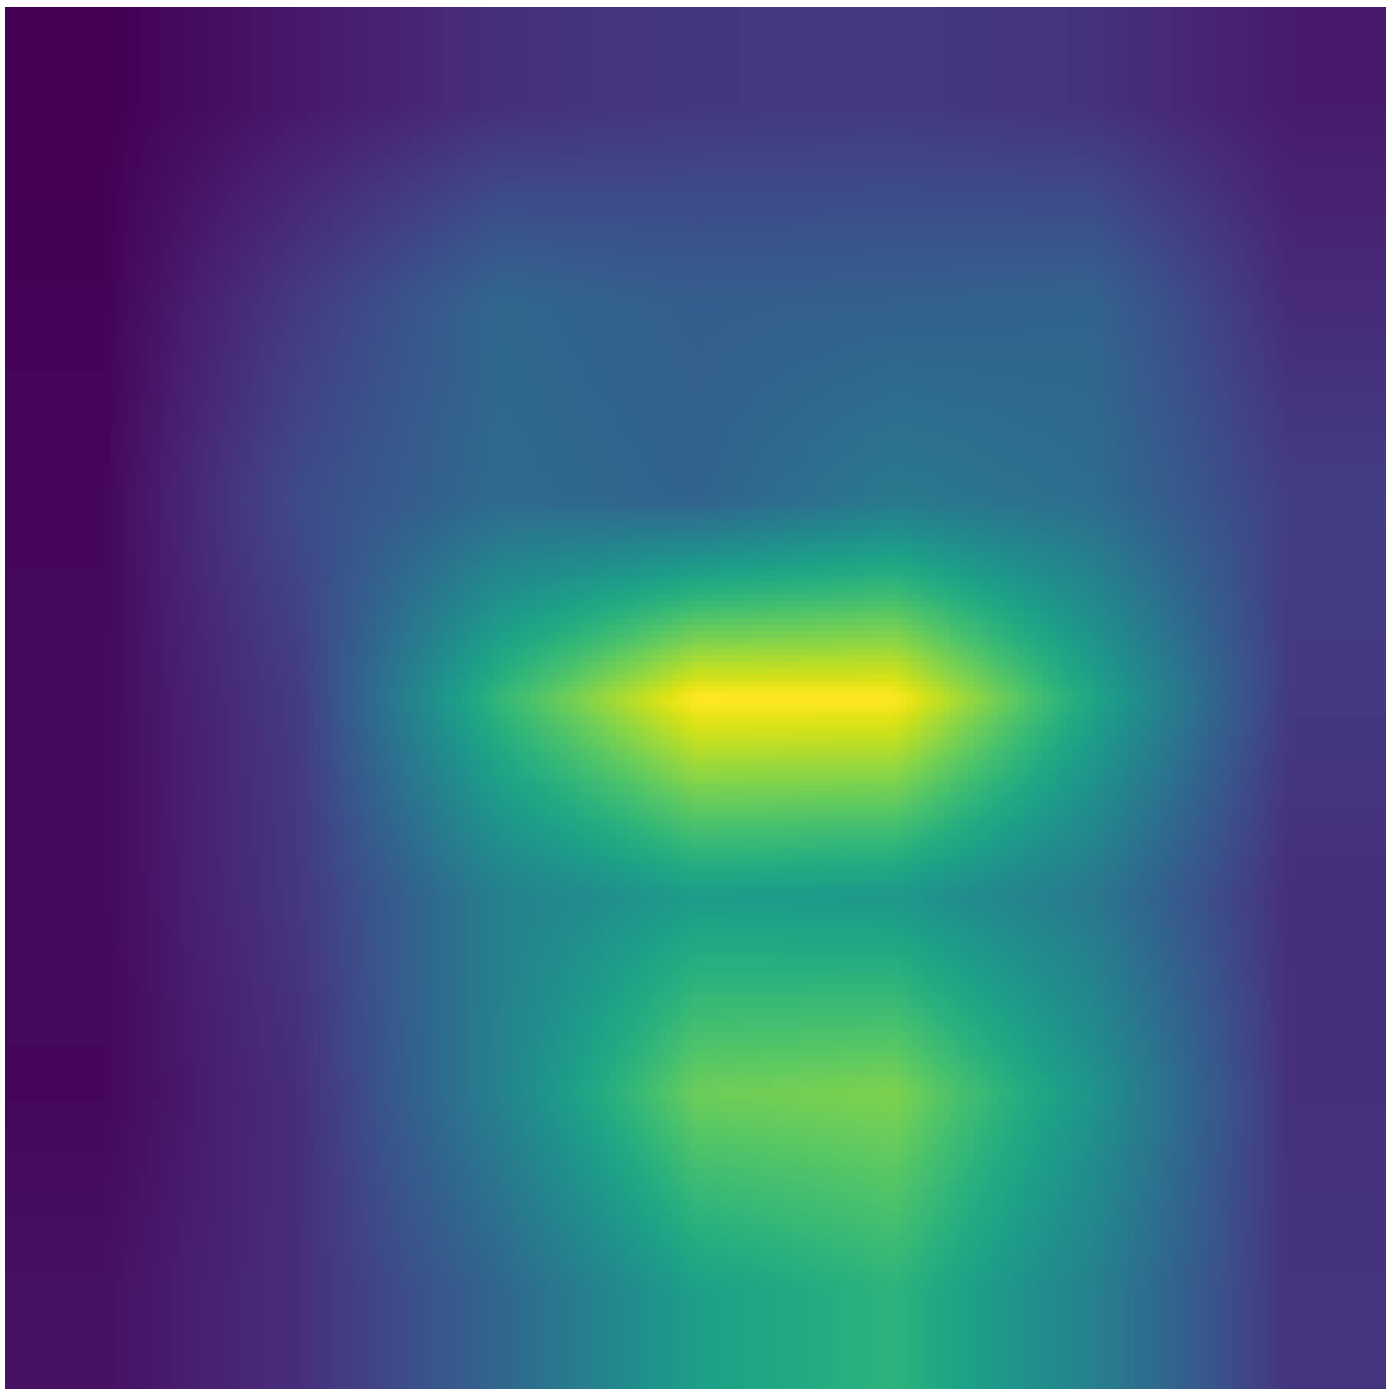

Supplement: Supplementary file 20 [file Serianni_Attention_IoU_Examining_CVPR_2025_supplemental.zip]

GradCAM - Target: all / Pointy\_Nose, Subset: all

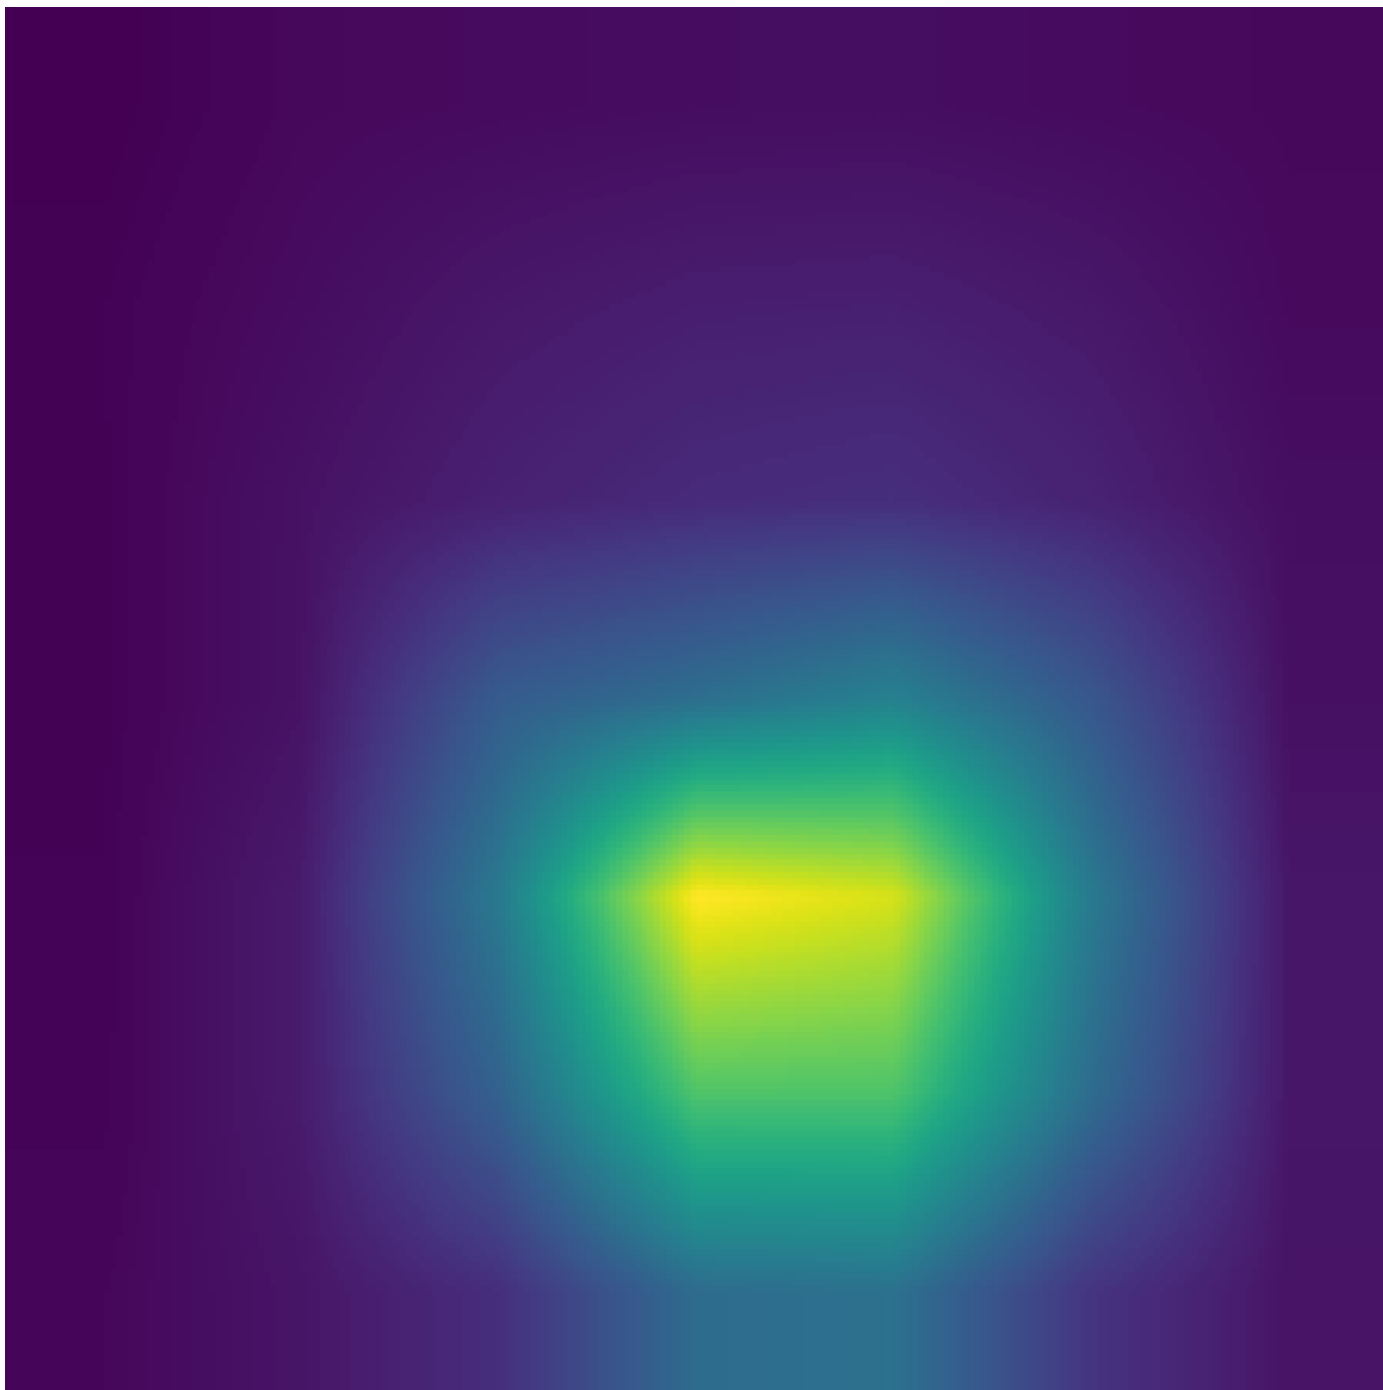

Supplement: Supplementary file 21 [file Serianni_Attention_IoU_Examining_CVPR_2025_supplemental.zip]

GradCAM - Target: all / Blond\_Hair, Subset: all

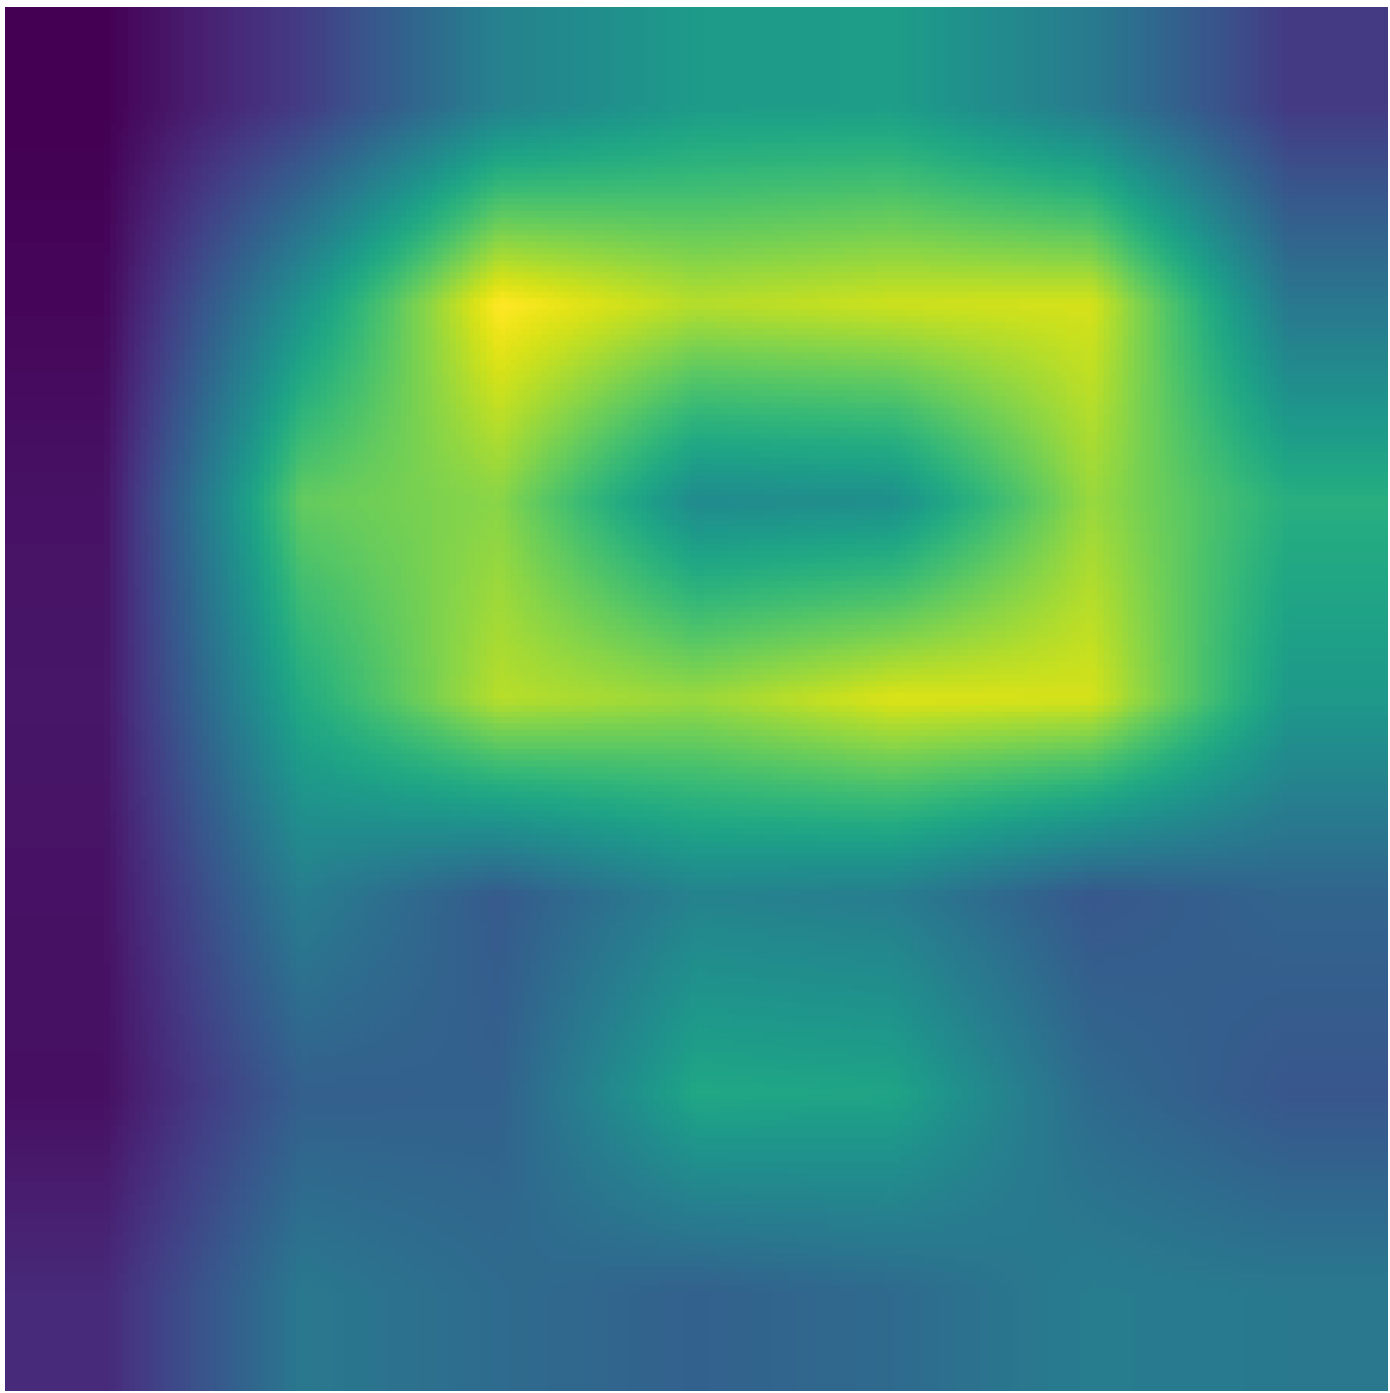

Supplement: Supplementary file 22 [file Serianni_Attention_IoU_Examining_CVPR_2025_supplemental.zip]

Worst Group Accuracy

Mask Score

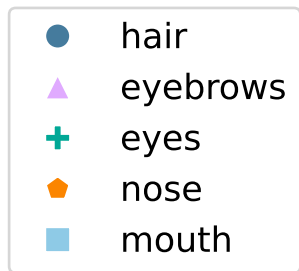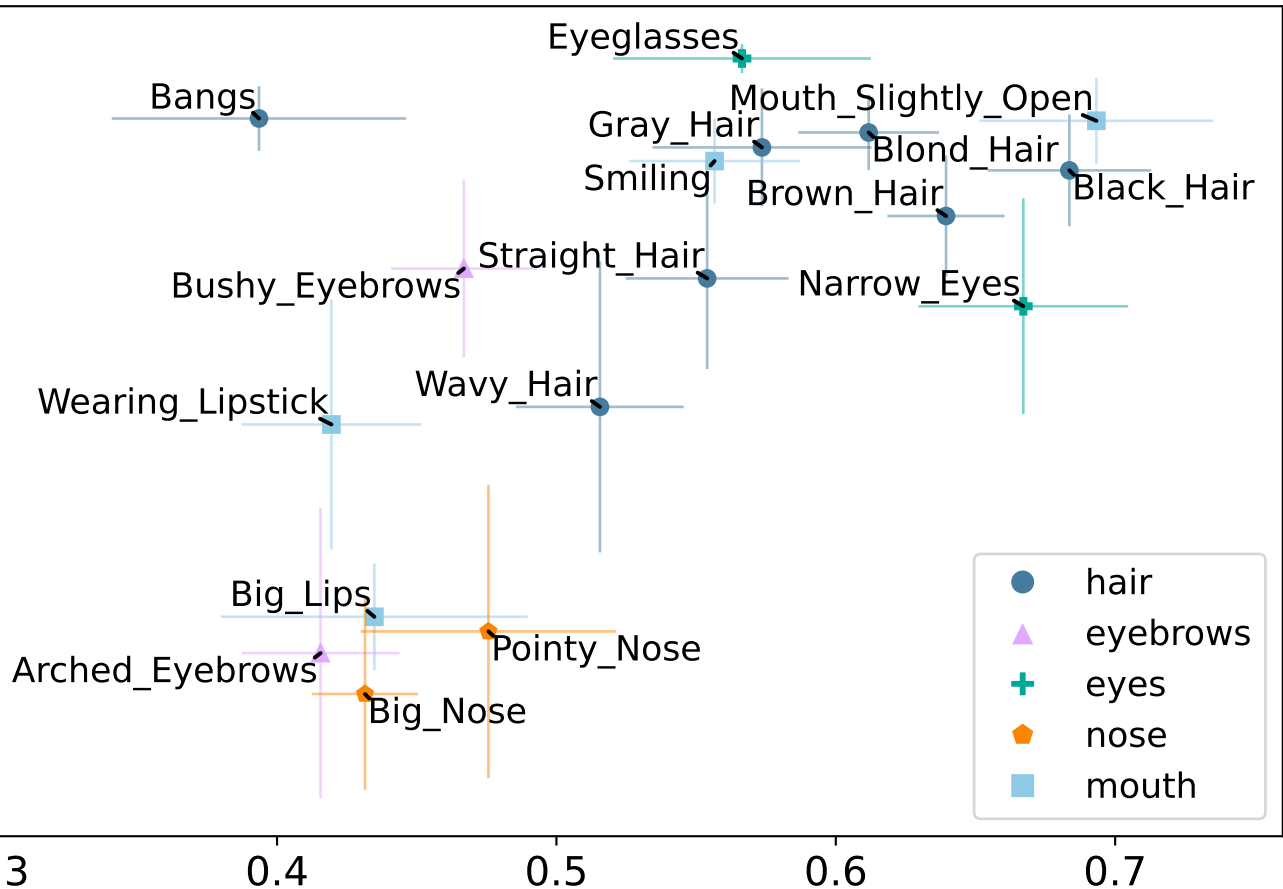

Supplement: Supplementary file 23 [file Serianni_Attention_IoU_Examining_CVPR_2025_supplemental.zip]

GradCAM - Target: all / Double\_Chin, Subset: all

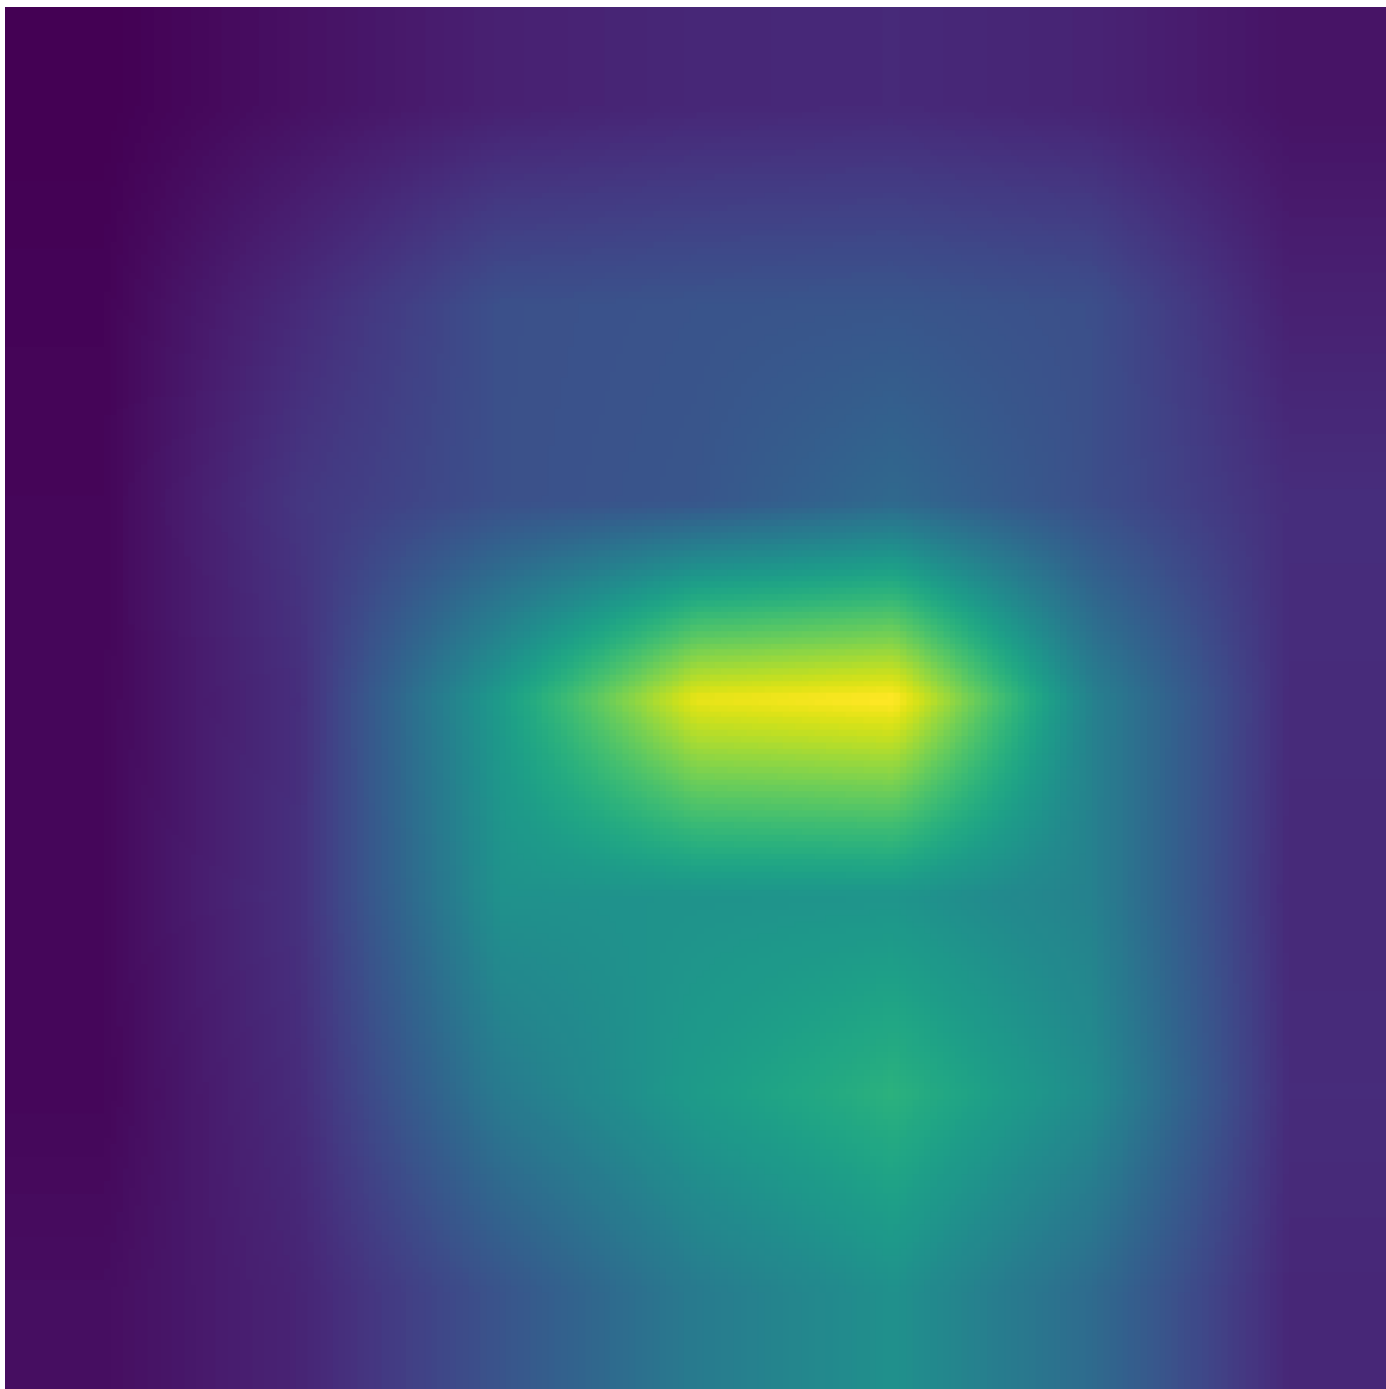

Supplement: Supplementary file 24 [file Serianni_Attention_IoU_Examining_CVPR_2025_supplemental.zip]

Normalized Average Precision

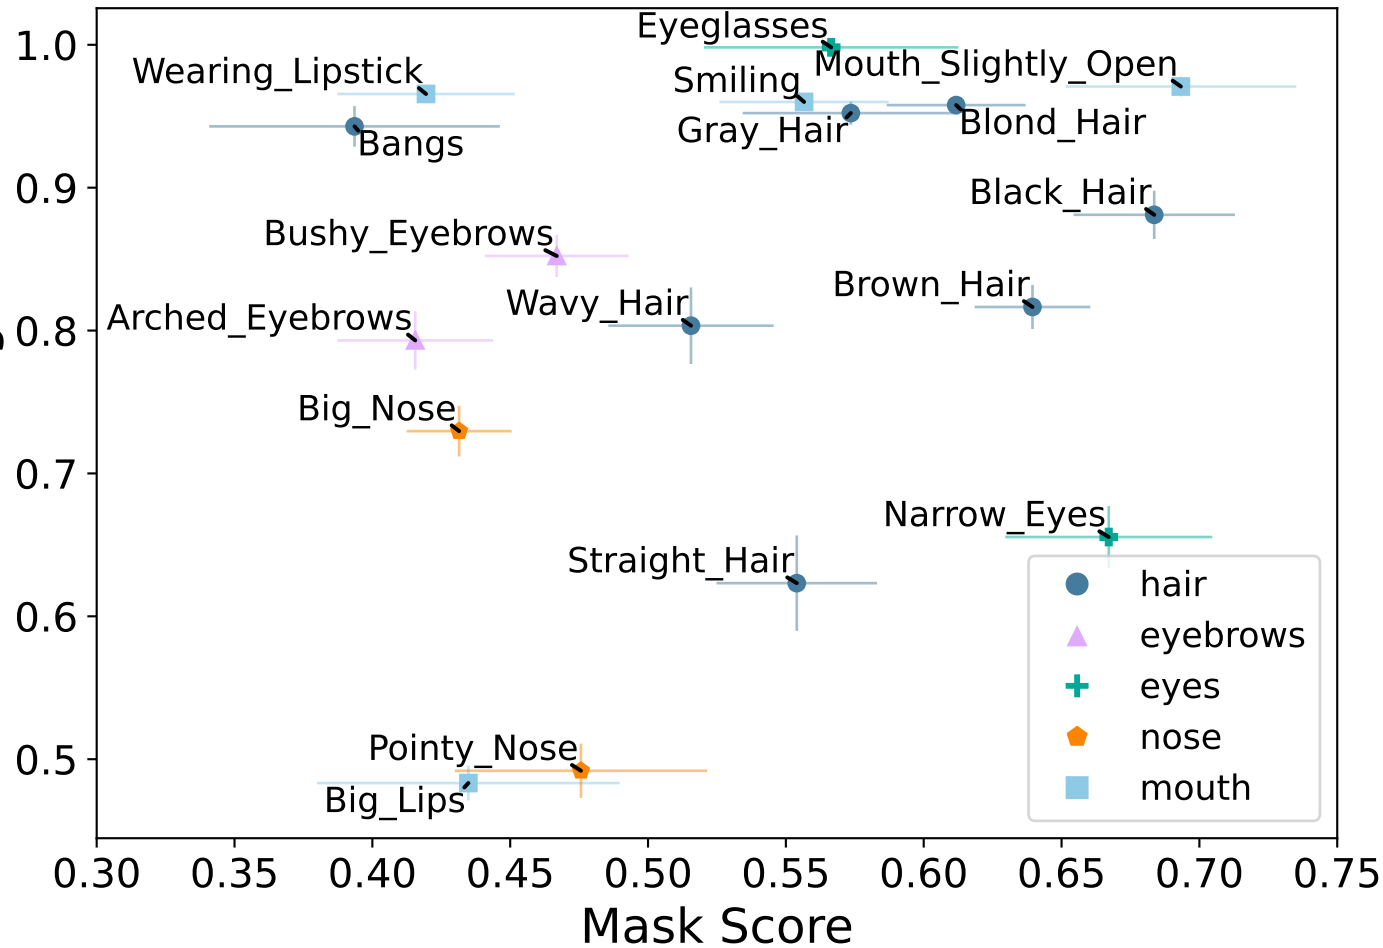

Supplement: Supplementary file 25 [file Serianni_Attention_IoU_Examining_CVPR_2025_supplemental.zip]

GradCAM - Target: all / Arched\_Eyebrows, Subset: all

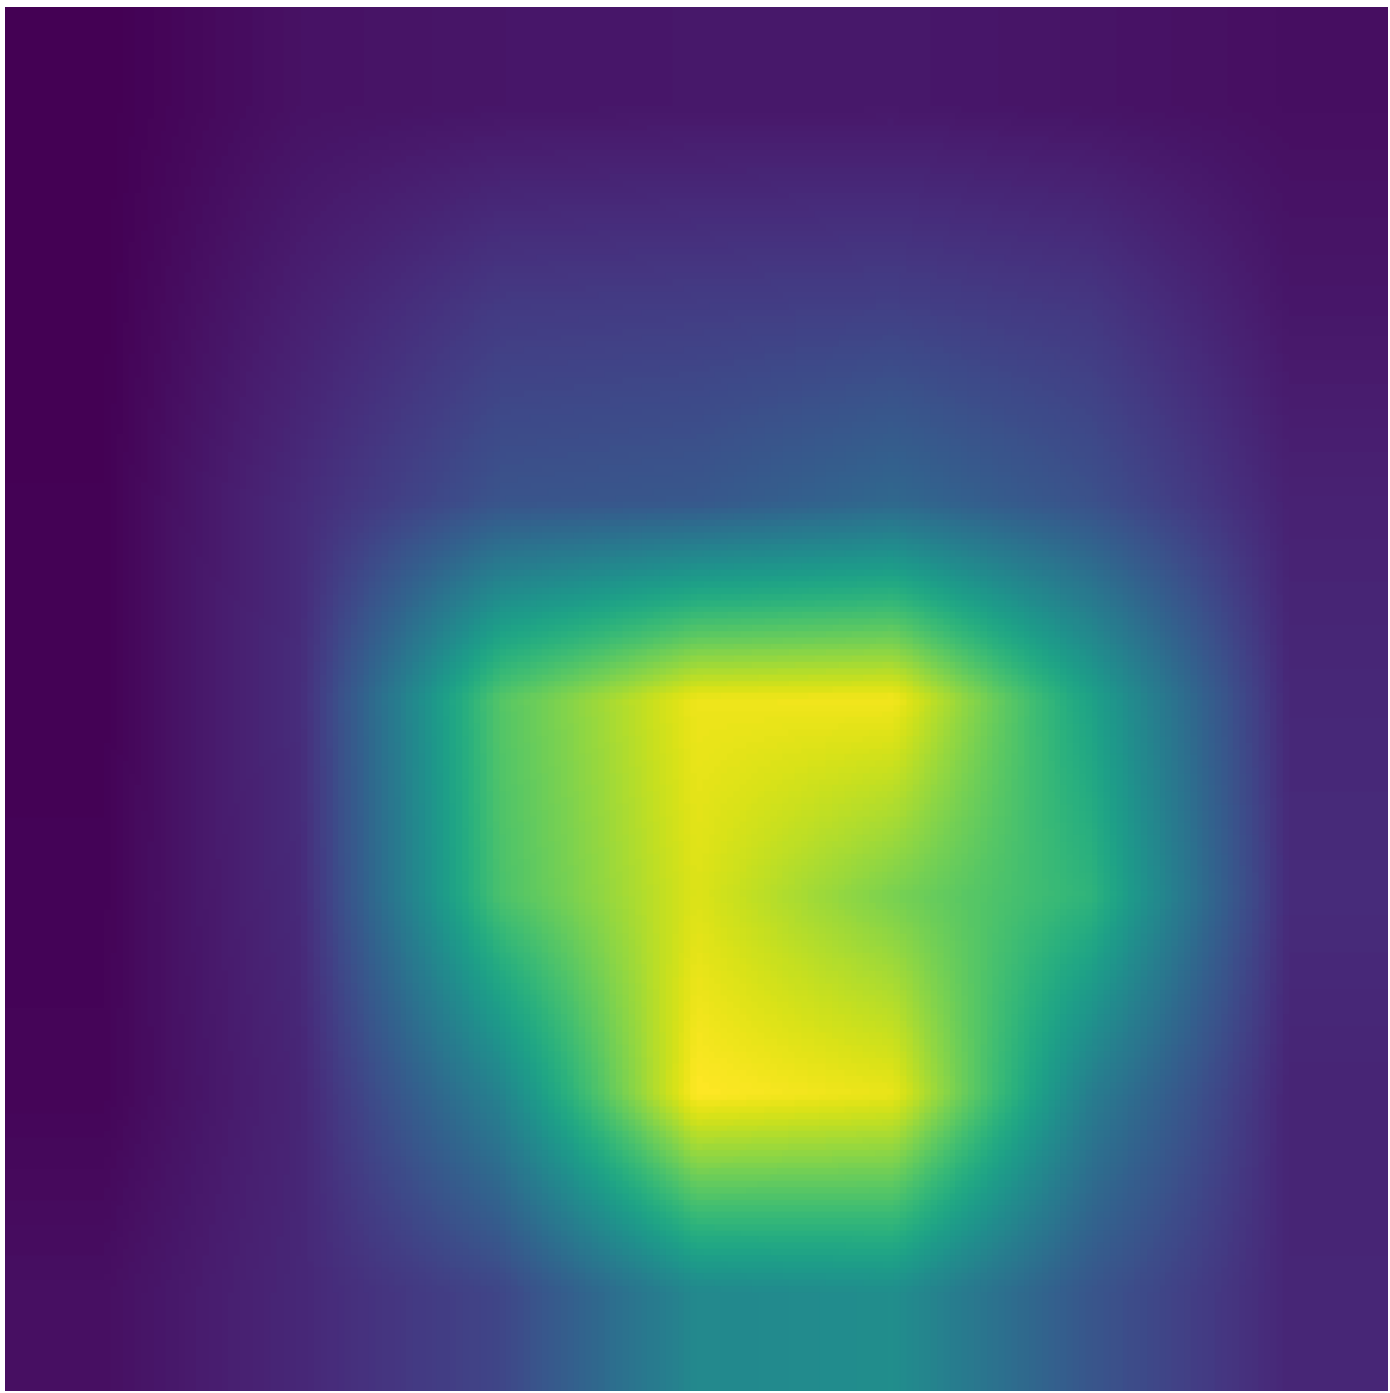

Supplement: Supplementary file 26 [file Serianni_Attention_IoU_Examining_CVPR_2025_supplemental.zip]

GradCAM - Target: all / Wearing\_Necktie, Subset: all

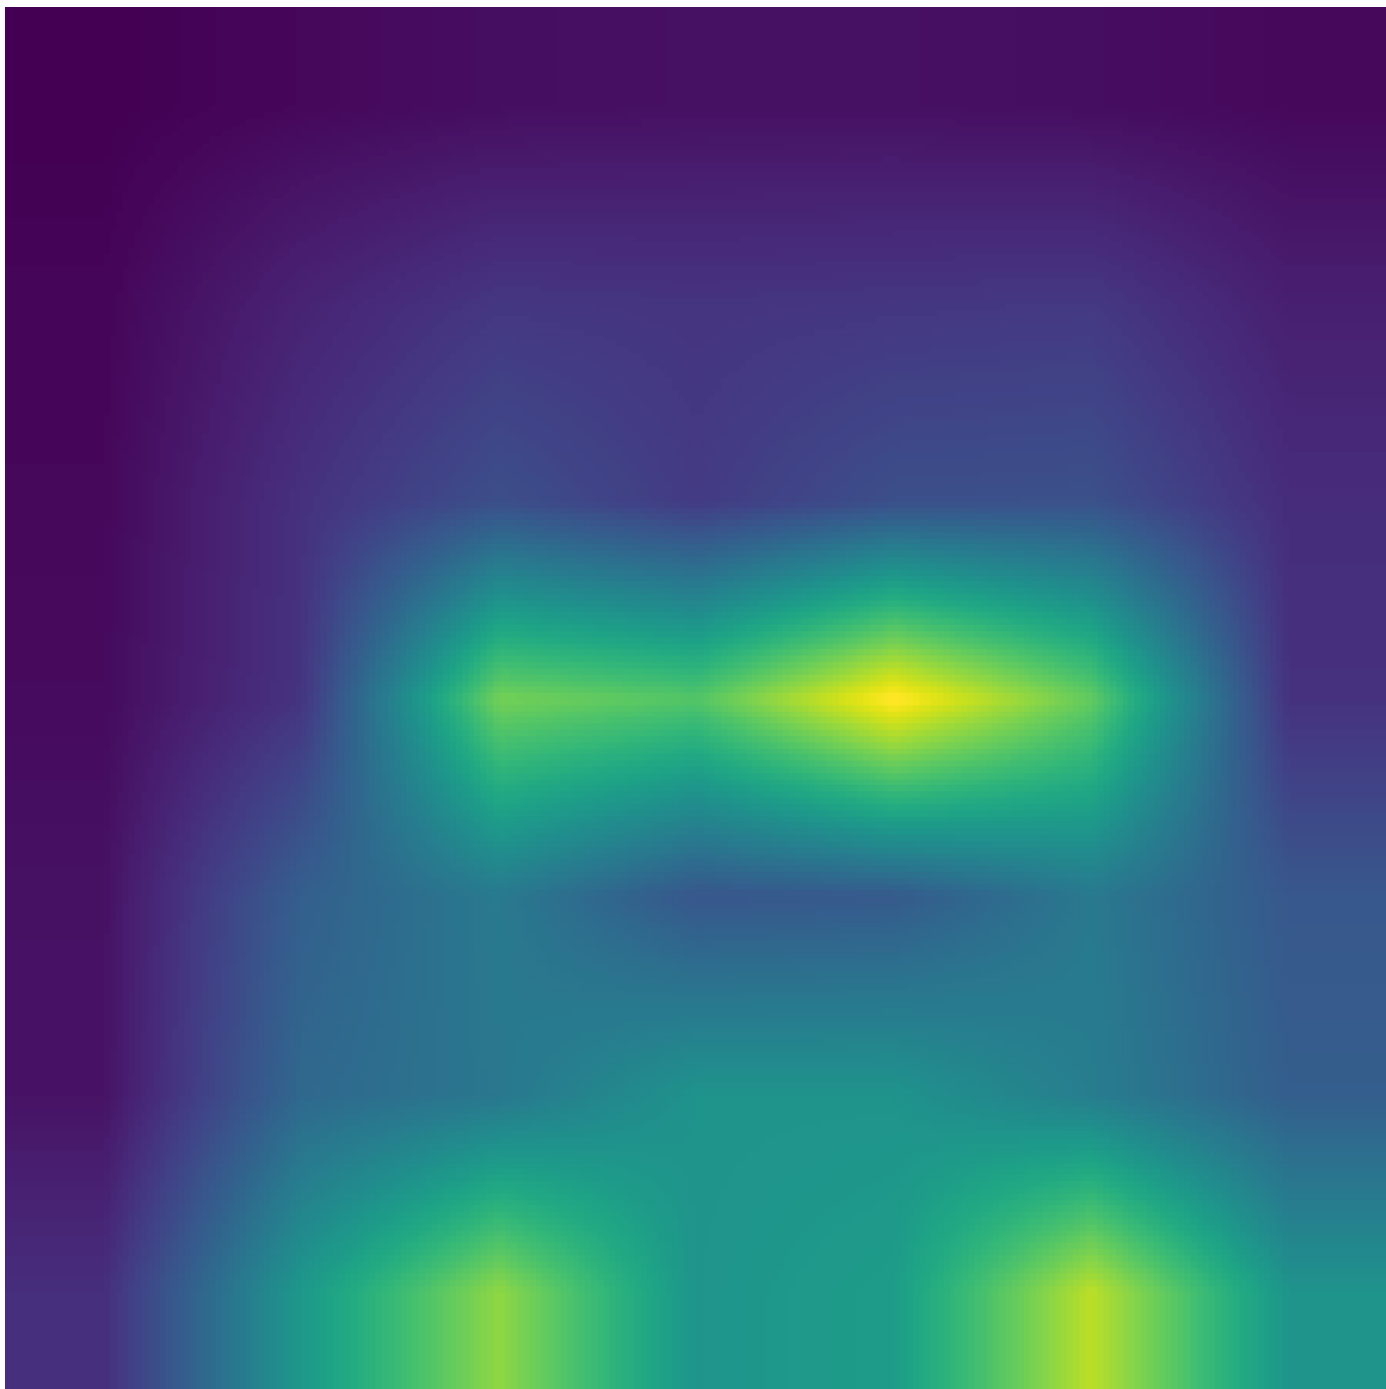

Supplement: Supplementary file 27 [file Serianni_Attention_IoU_Examining_CVPR_2025_supplemental.zip]

GradCAM - Target: all / Straight\_Hair, Subset: all

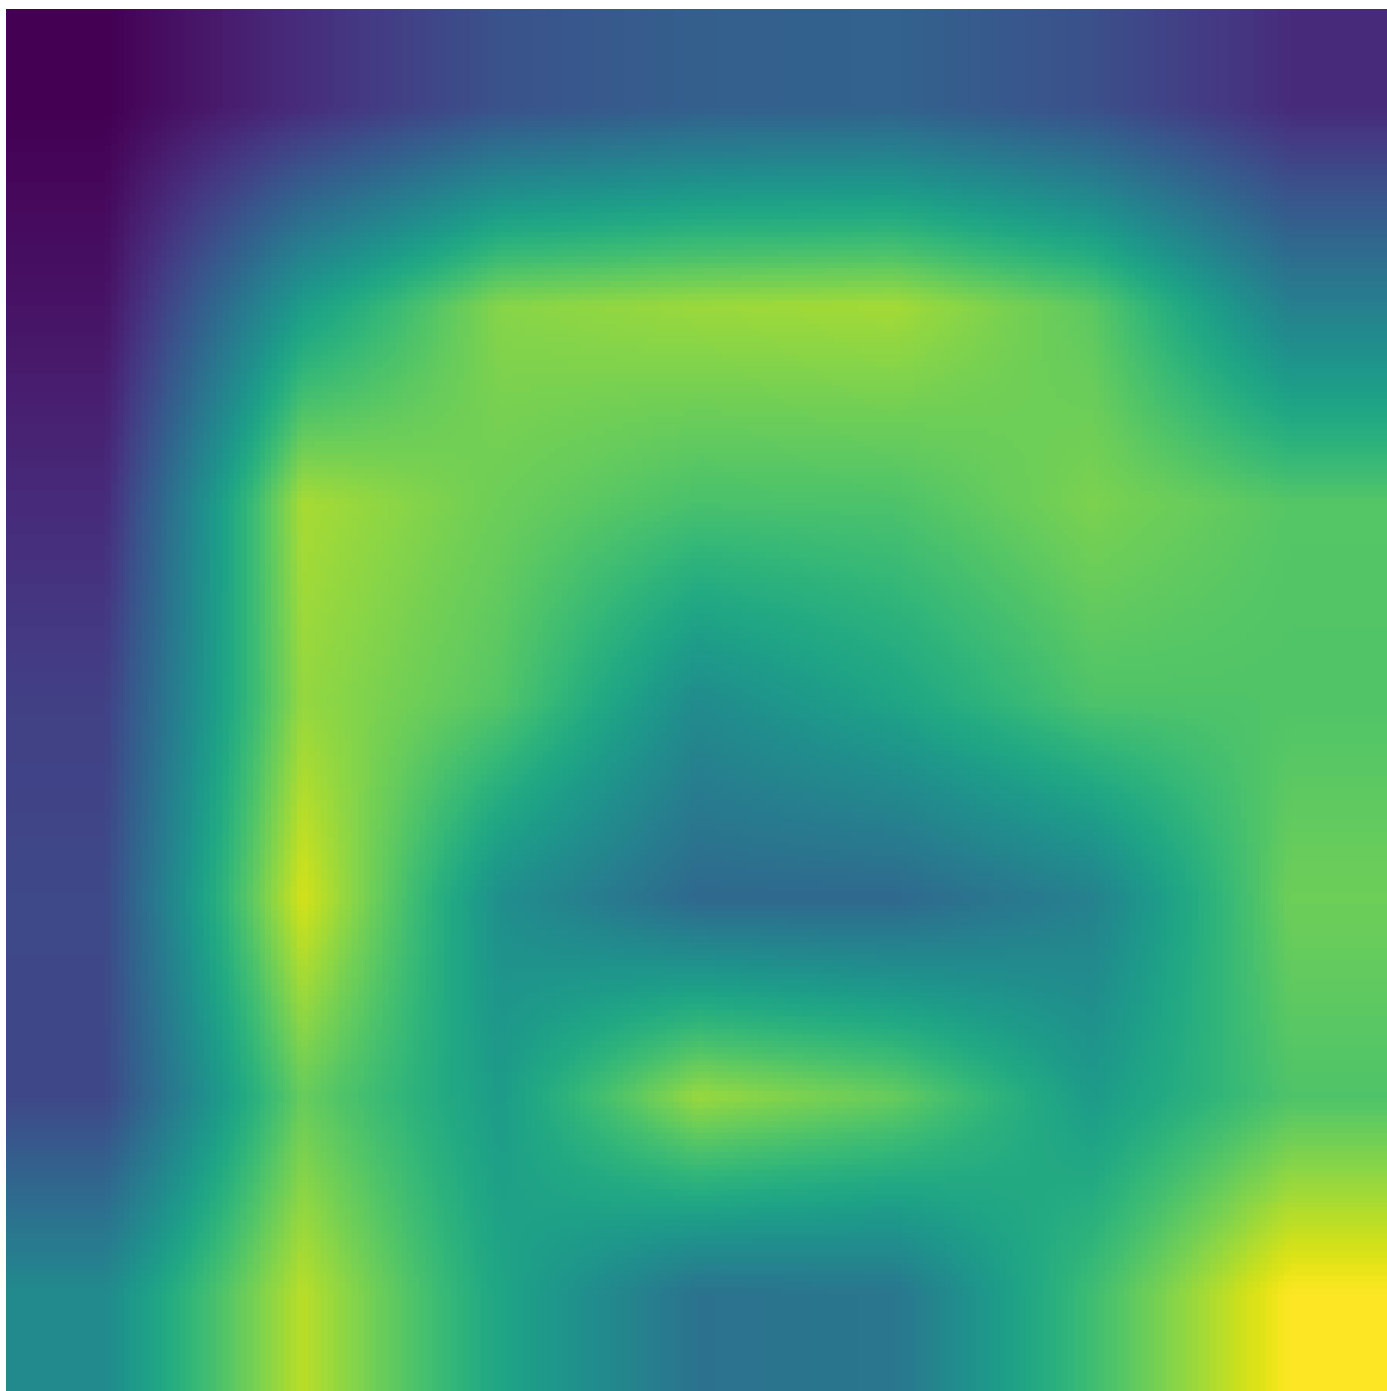

Supplement: Supplementary file 28 [file Serianni_Attention_IoU_Examining_CVPR_2025_supplemental.zip]

GradCAM - Target: all / Heavy\_Makeup, Subset: all

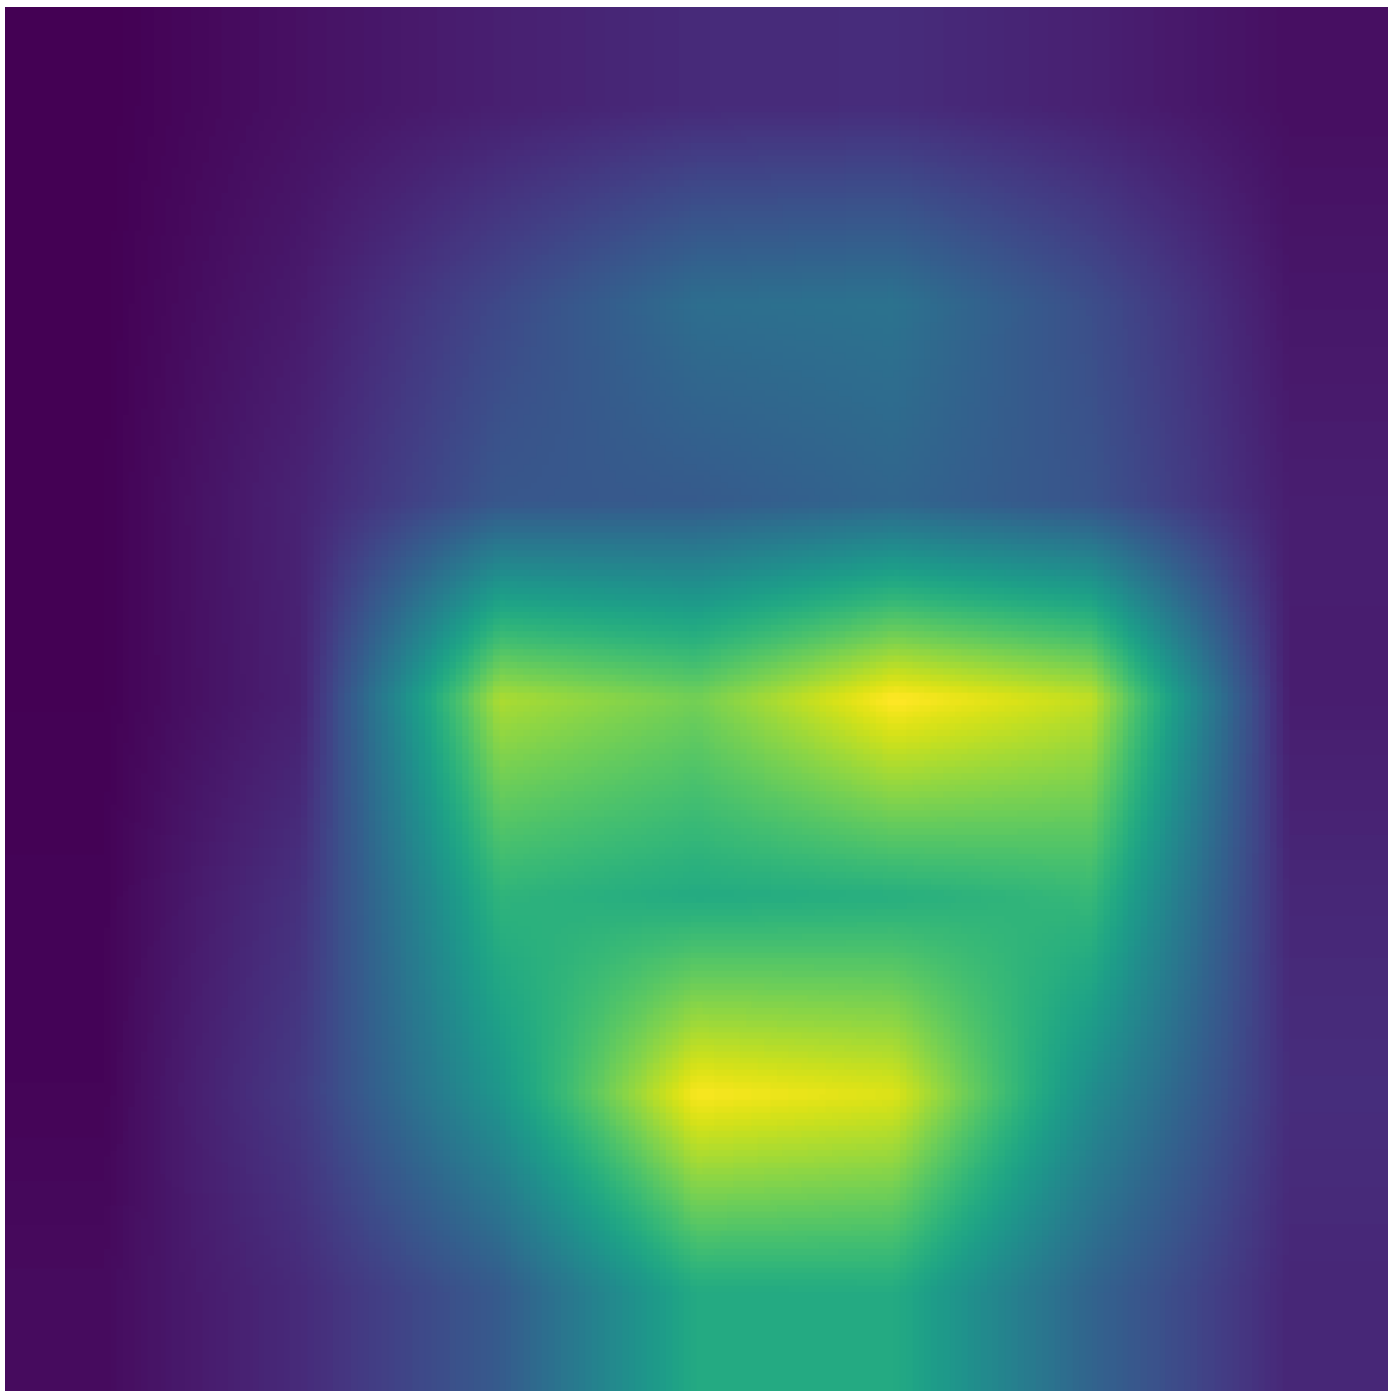

Supplement: Supplementary file 29 [file Serianni_Attention_IoU_Examining_CVPR_2025_supplemental.zip]

GradCAM - Target: all / Brown\_Hair, Subset: all

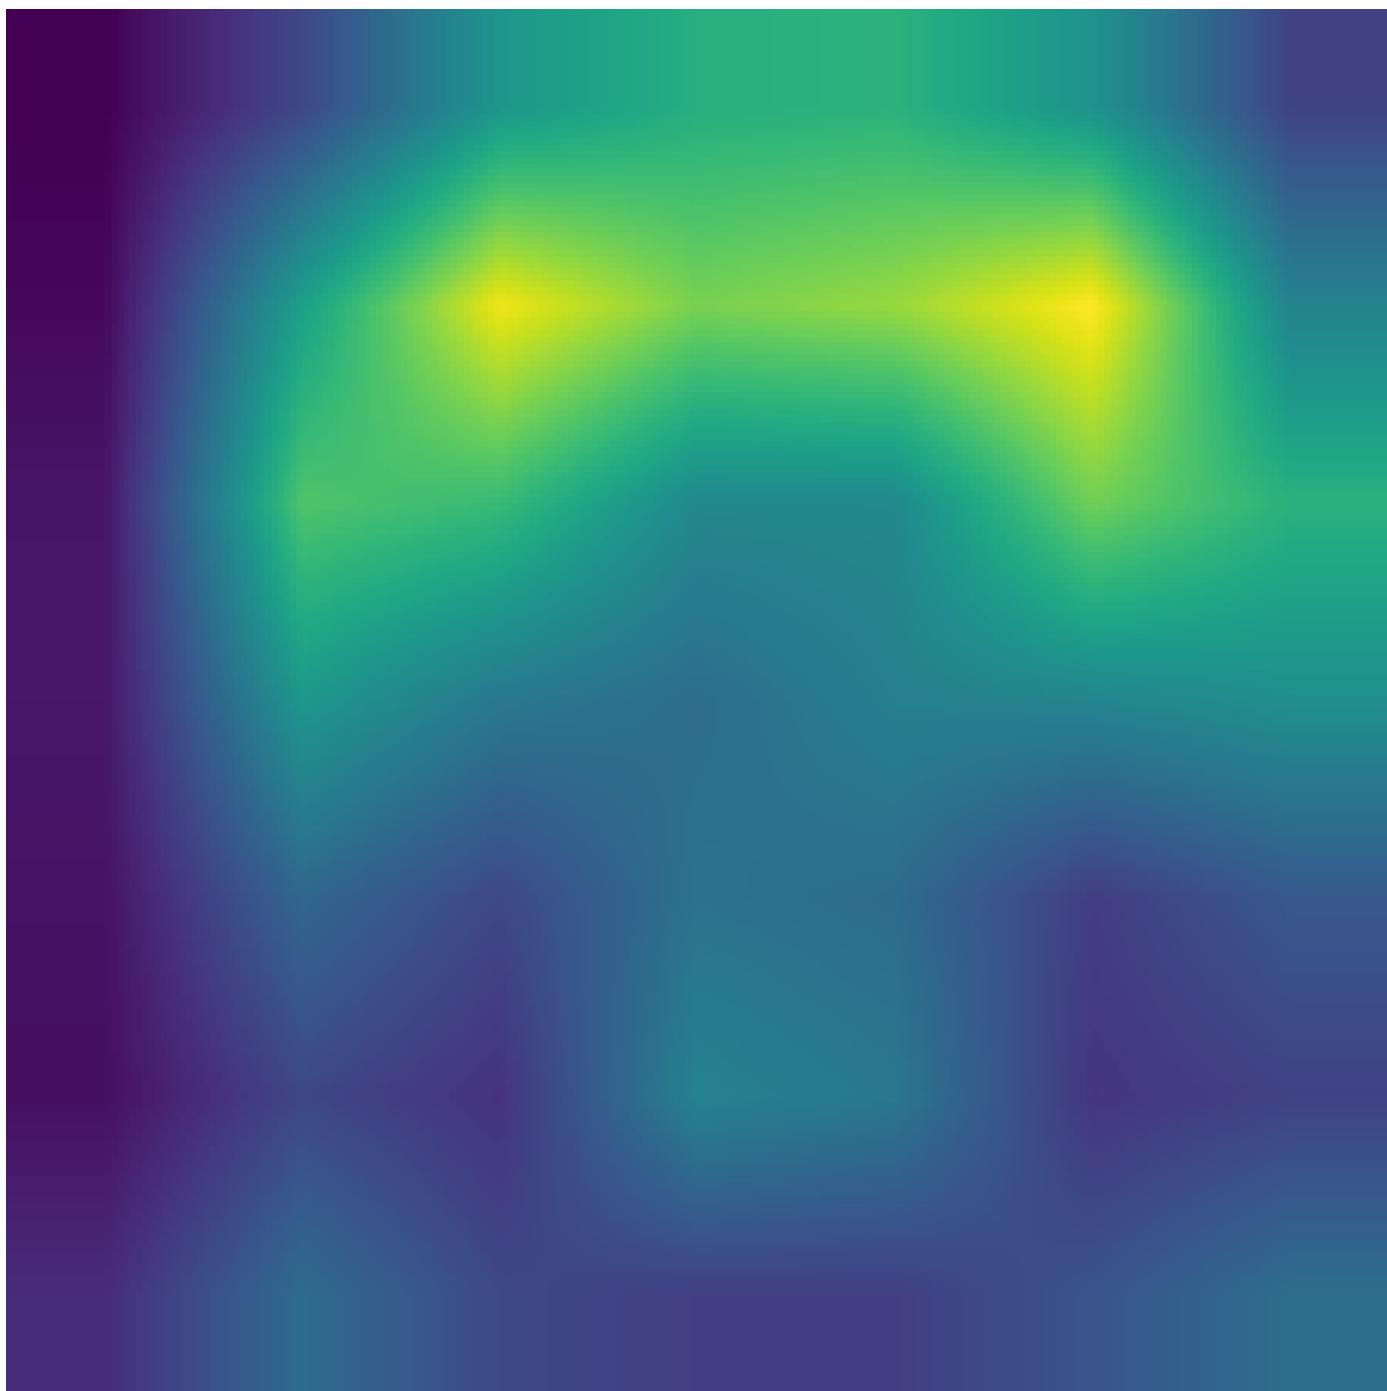

Supplement: Supplementary file 30 [file Serianni_Attention_IoU_Examining_CVPR_2025_supplemental.zip]

GradCAM - Target: all / Mouth\_Slightly\_Open, Subset: all

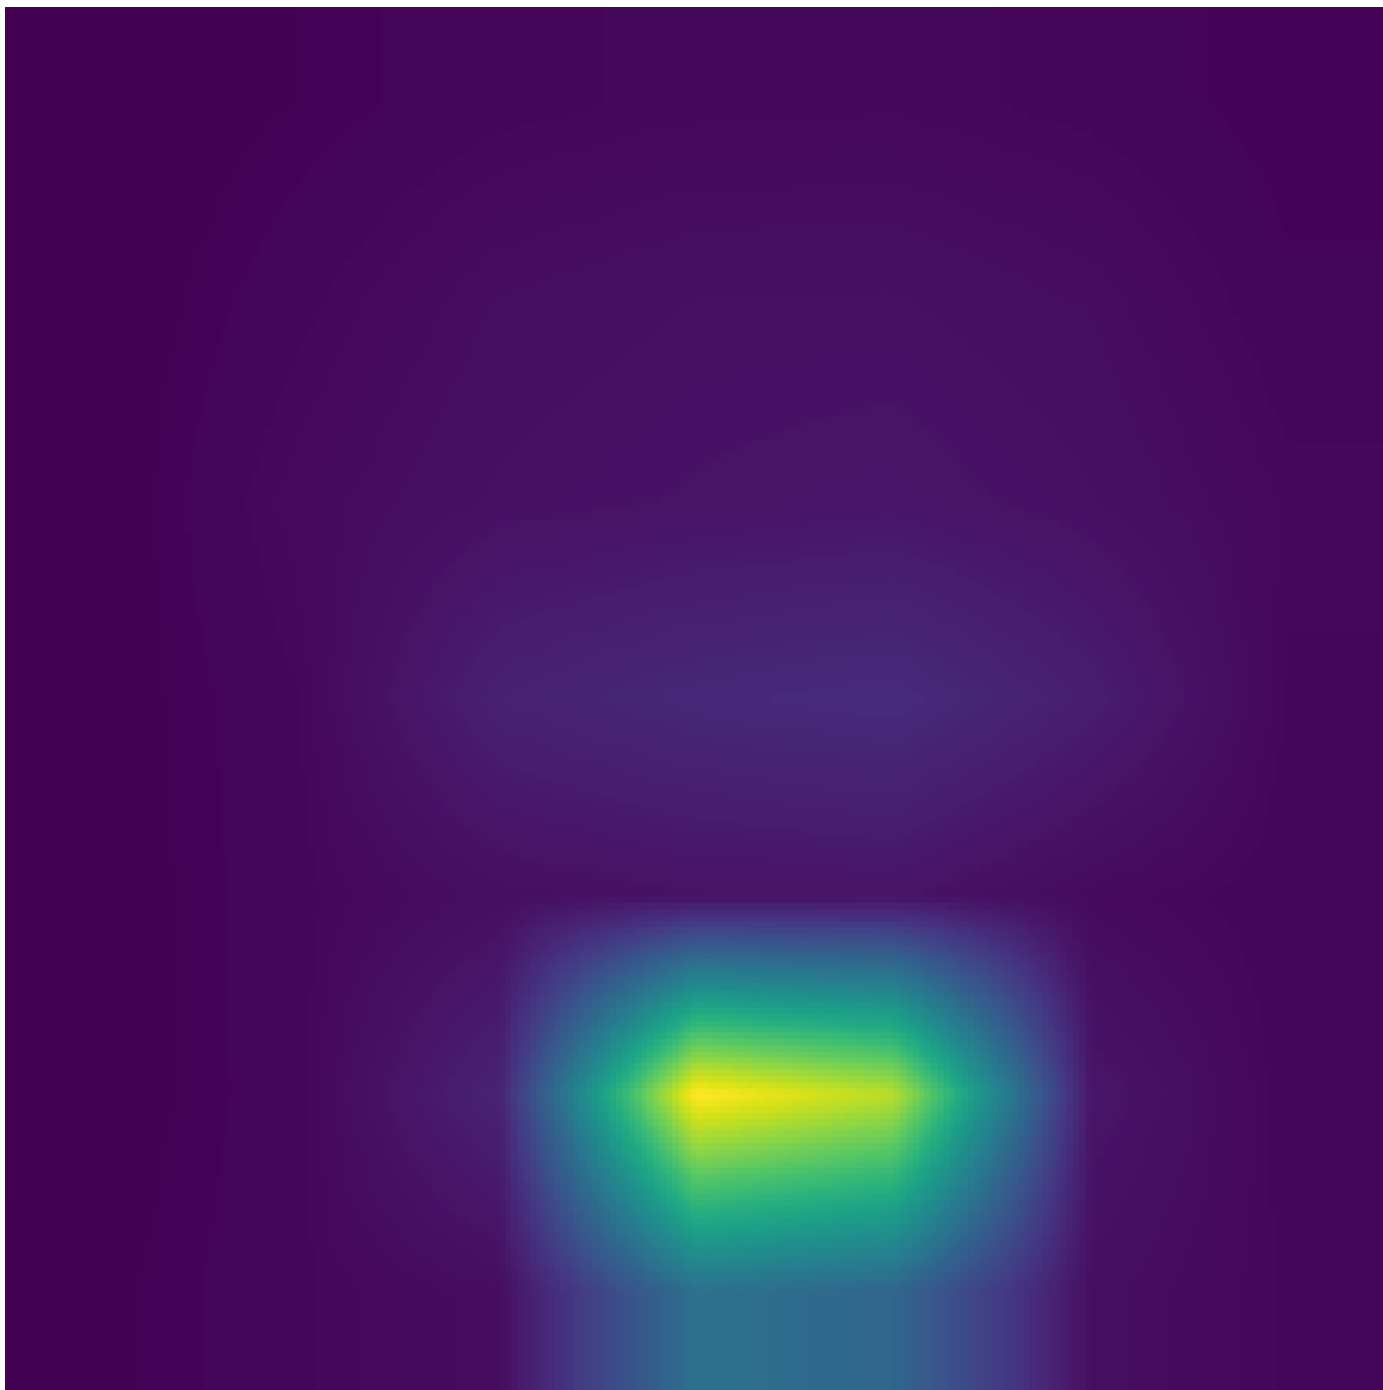

Supplement: Supplementary file 31 [file Serianni_Attention_IoU_Examining_CVPR_2025_supplemental.zip]

GradCAM - Target: all / Oval\_Face, Subset: all

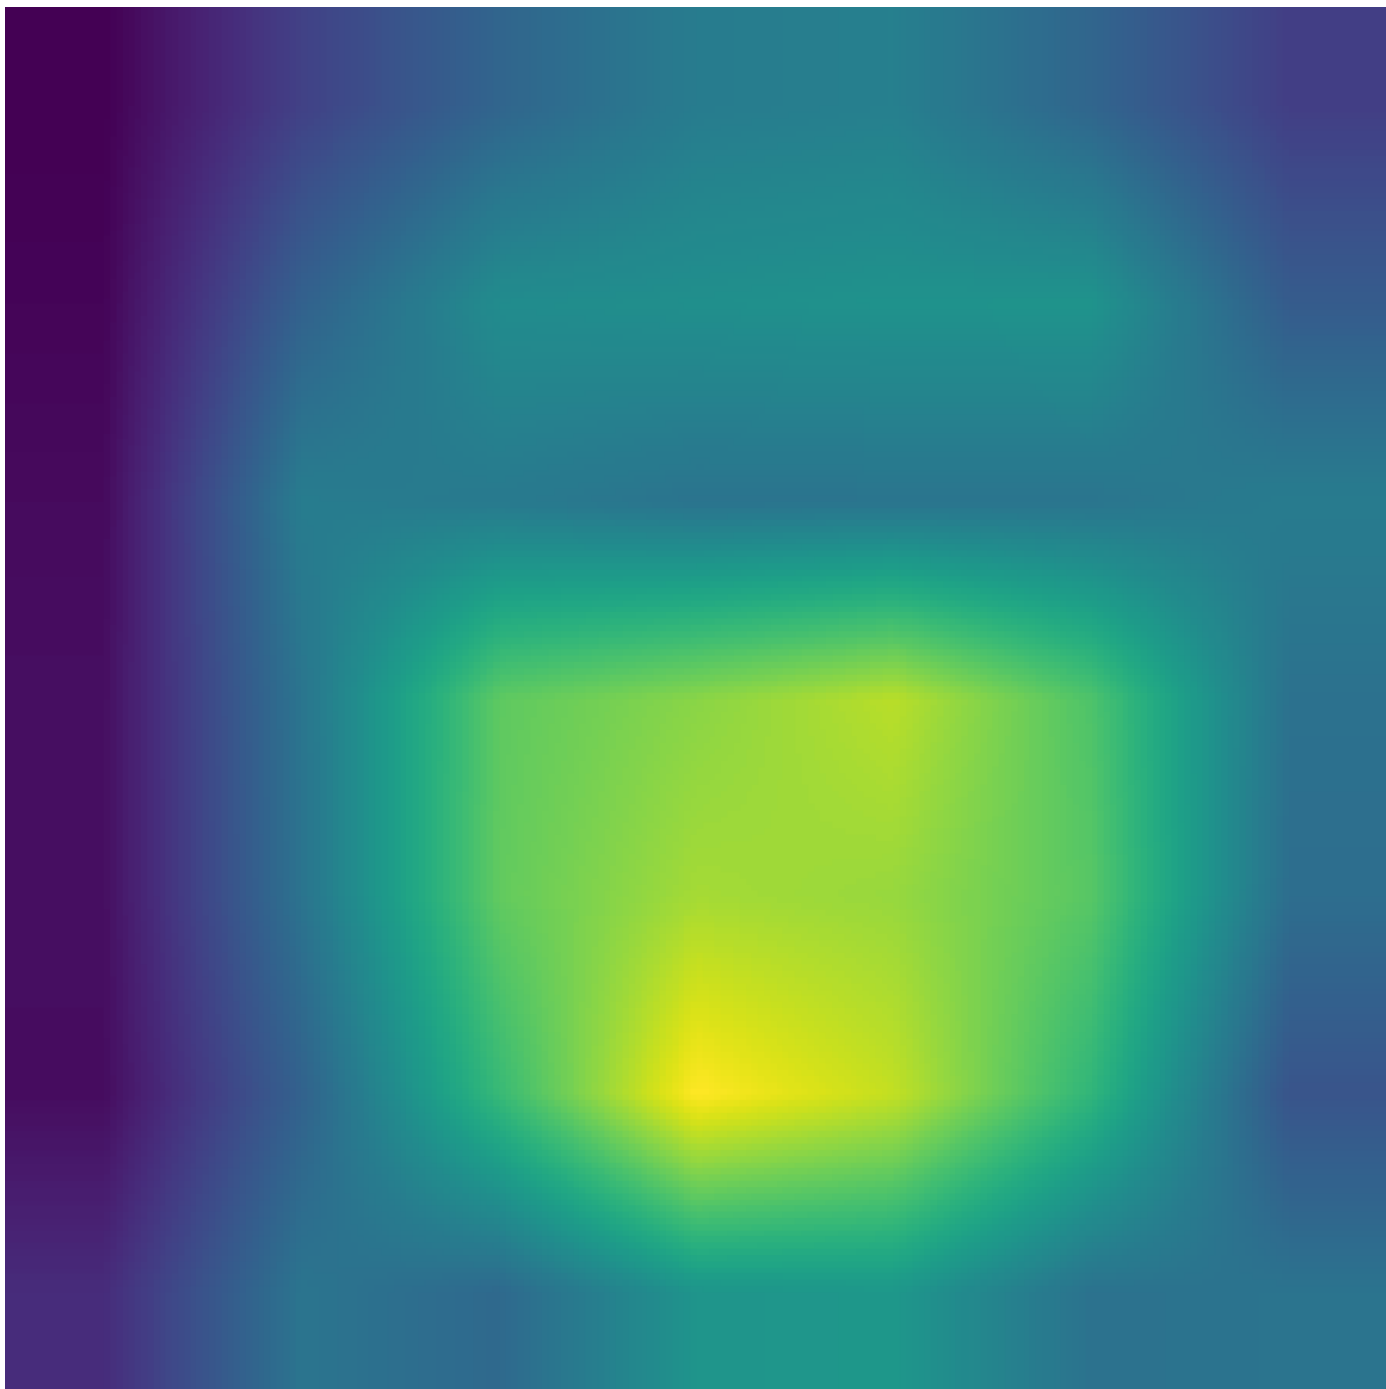

Supplement: Supplementary file 32 [file Serianni_Attention_IoU_Examining_CVPR_2025_supplemental.zip]

GradCAM - Target: all / Arched\_Eyebrows, Subset: all

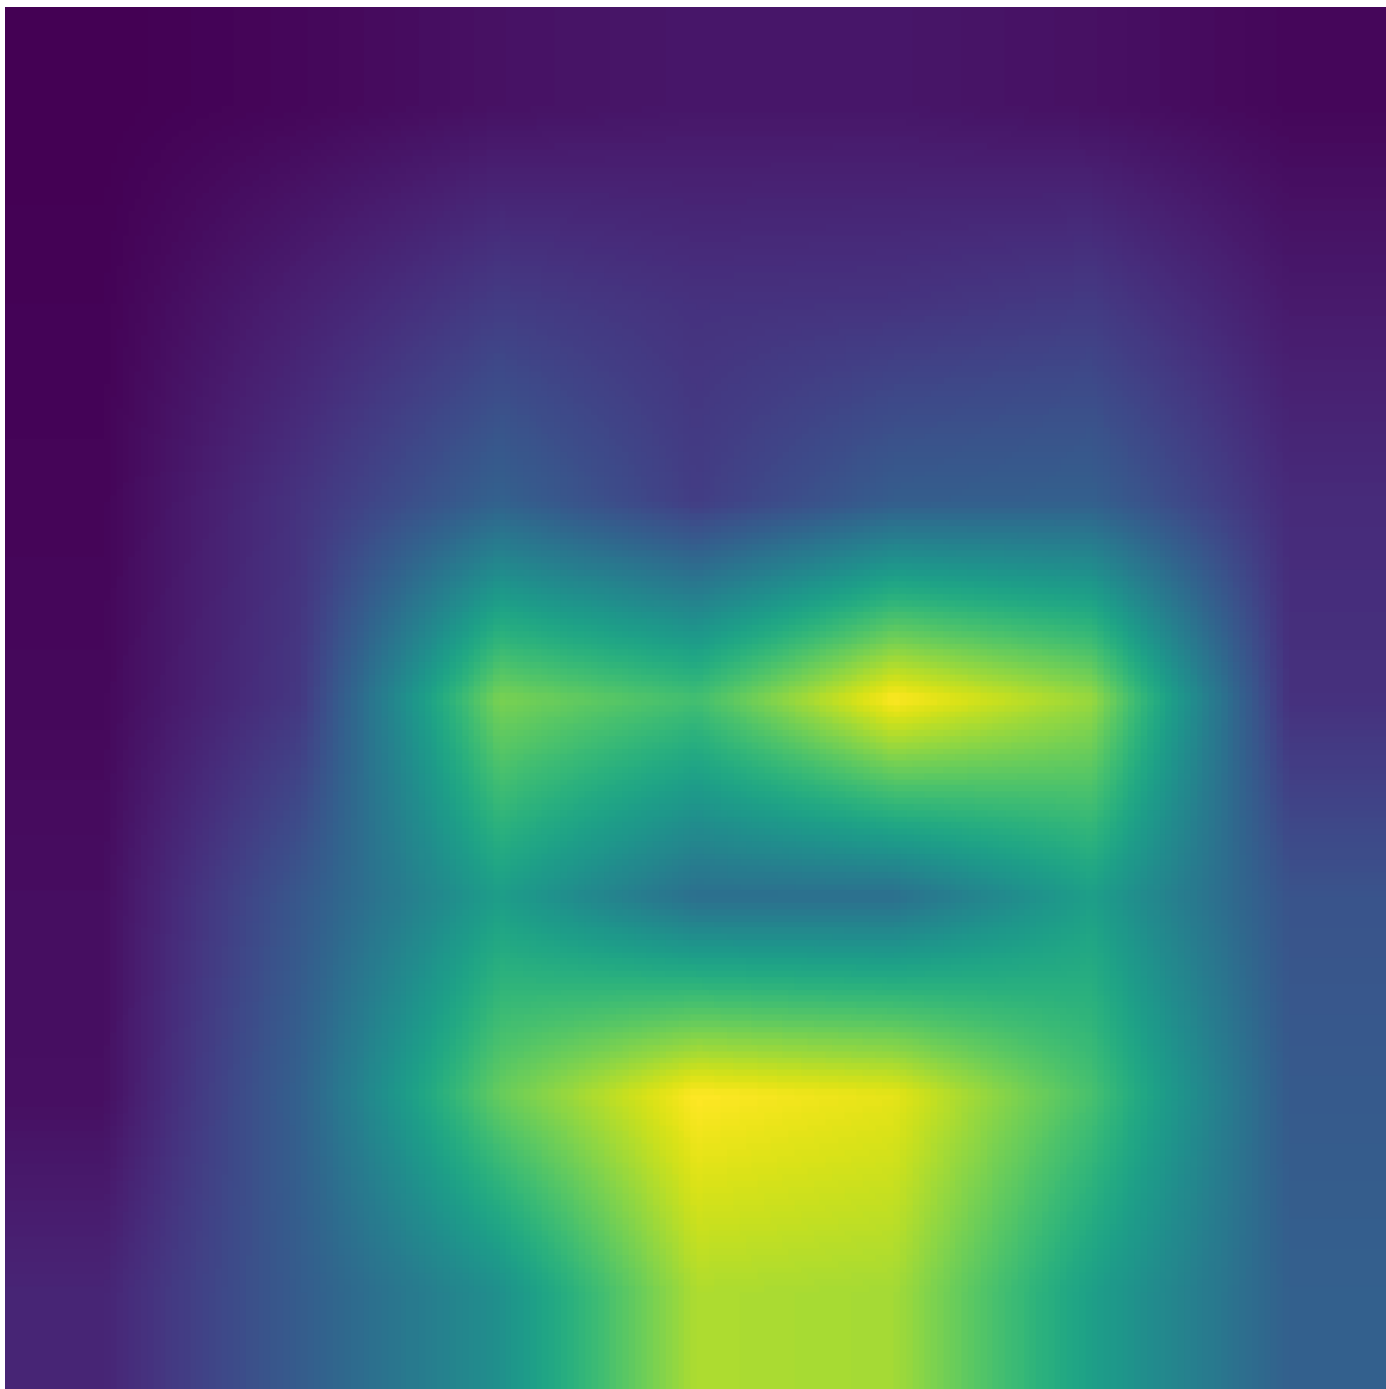

Supplement: Supplementary file 33 [file Serianni_Attention_IoU_Examining_CVPR_2025_supplemental.zip]

GradCAM - Target: all / Black\_Hair, Subset: all

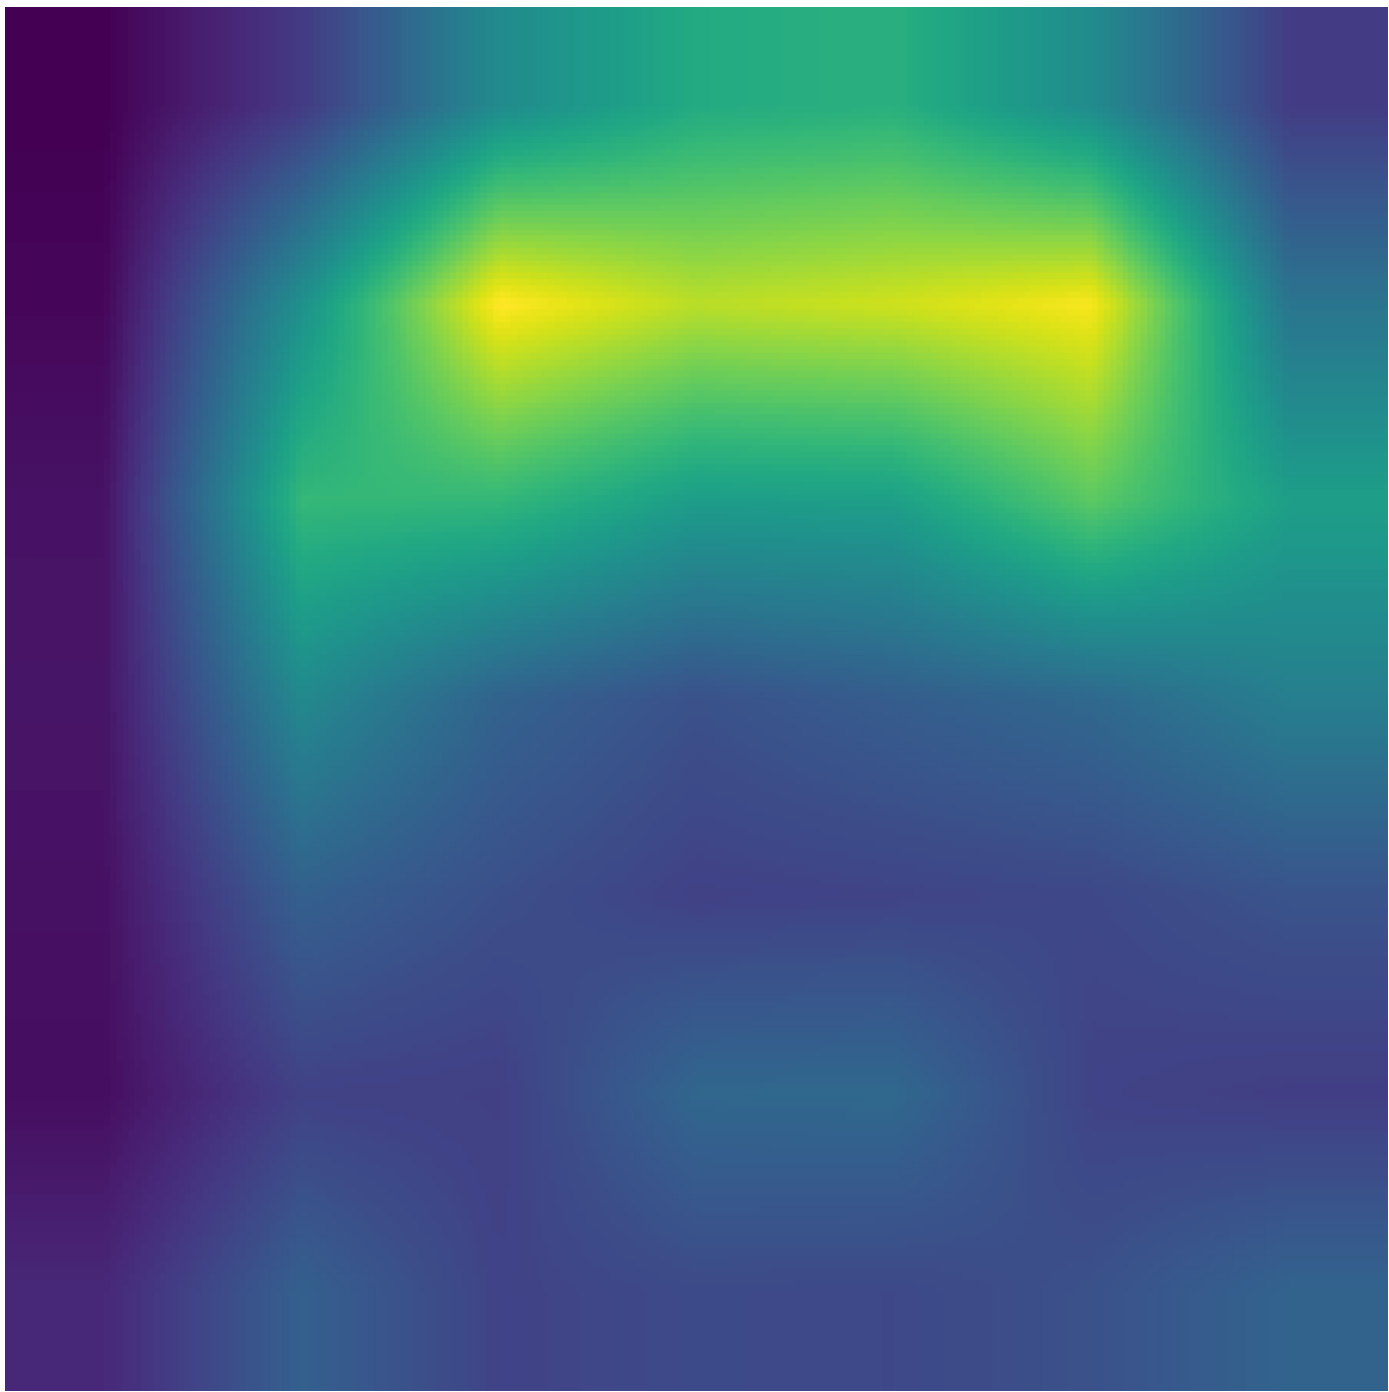

Supplement: Supplementary file 34 [file Serianni_Attention_IoU_Examining_CVPR_2025_supplemental.zip]

GradCAM - Target: all / Bangs, Subset: all

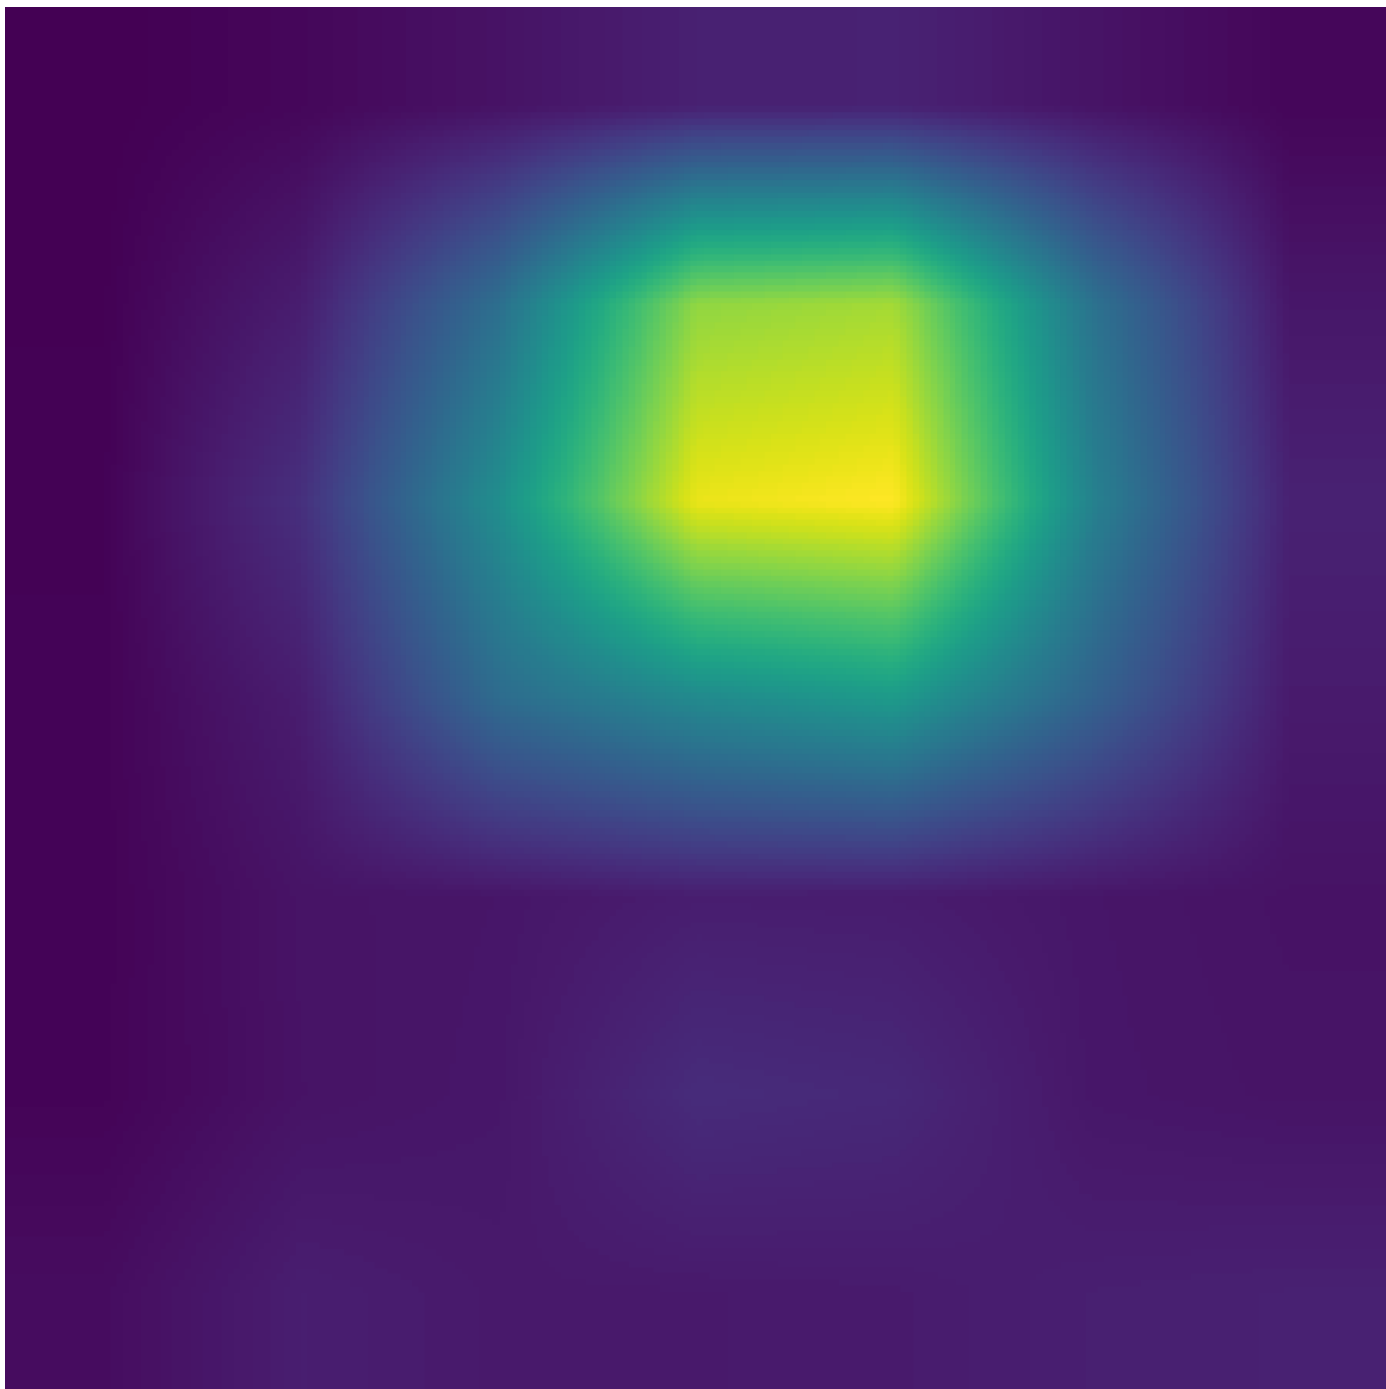

Supplement: Supplementary file 35 [file Serianni_Attention_IoU_Examining_CVPR_2025_supplemental.zip]

GradCAM - Target: all / No\_Beard, Subset: all

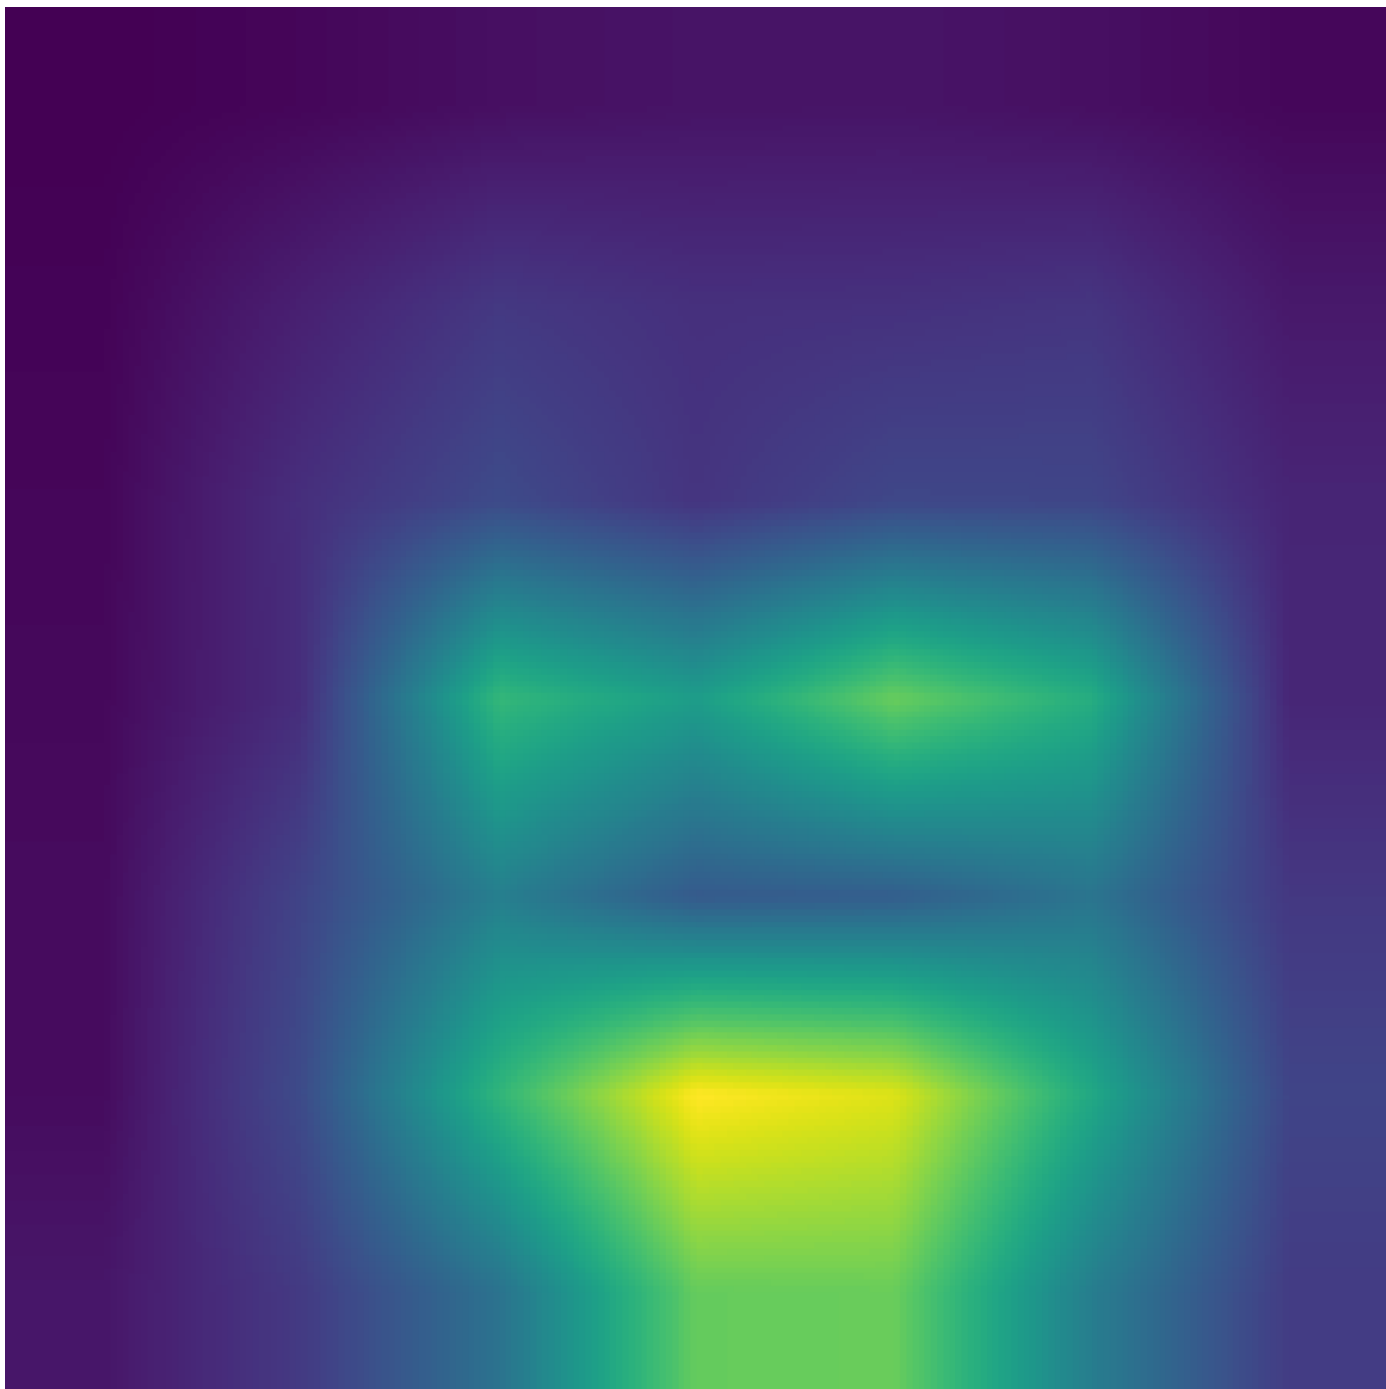

Supplement: Supplementary file 37 [file Serianni_Attention_IoU_Examining_CVPR_2025_supplemental.zip]

GradCAM - Target: all / Gray\_Hair, Subset: all

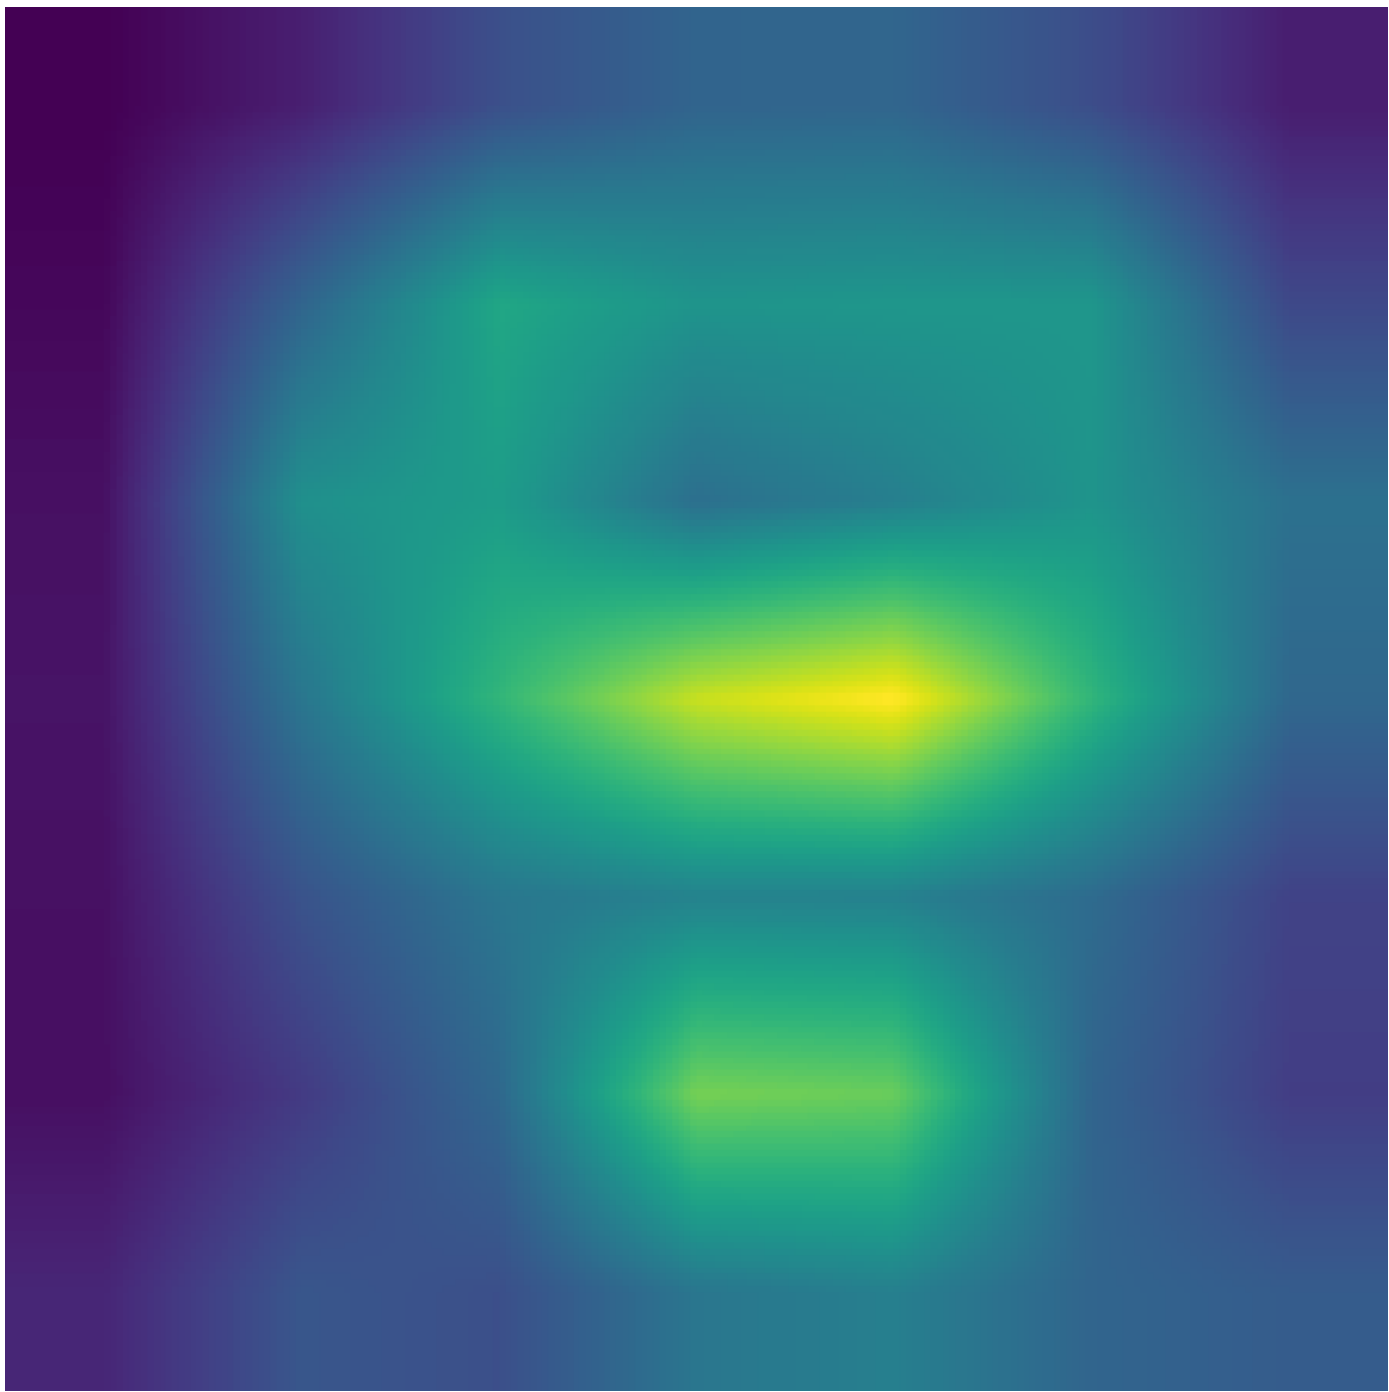

Supplement: Supplementary file 38 [file Serianni_Attention_IoU_Examining_CVPR_2025_supplemental.zip]

GradCAM - Target: all / Smiling, Subset: all

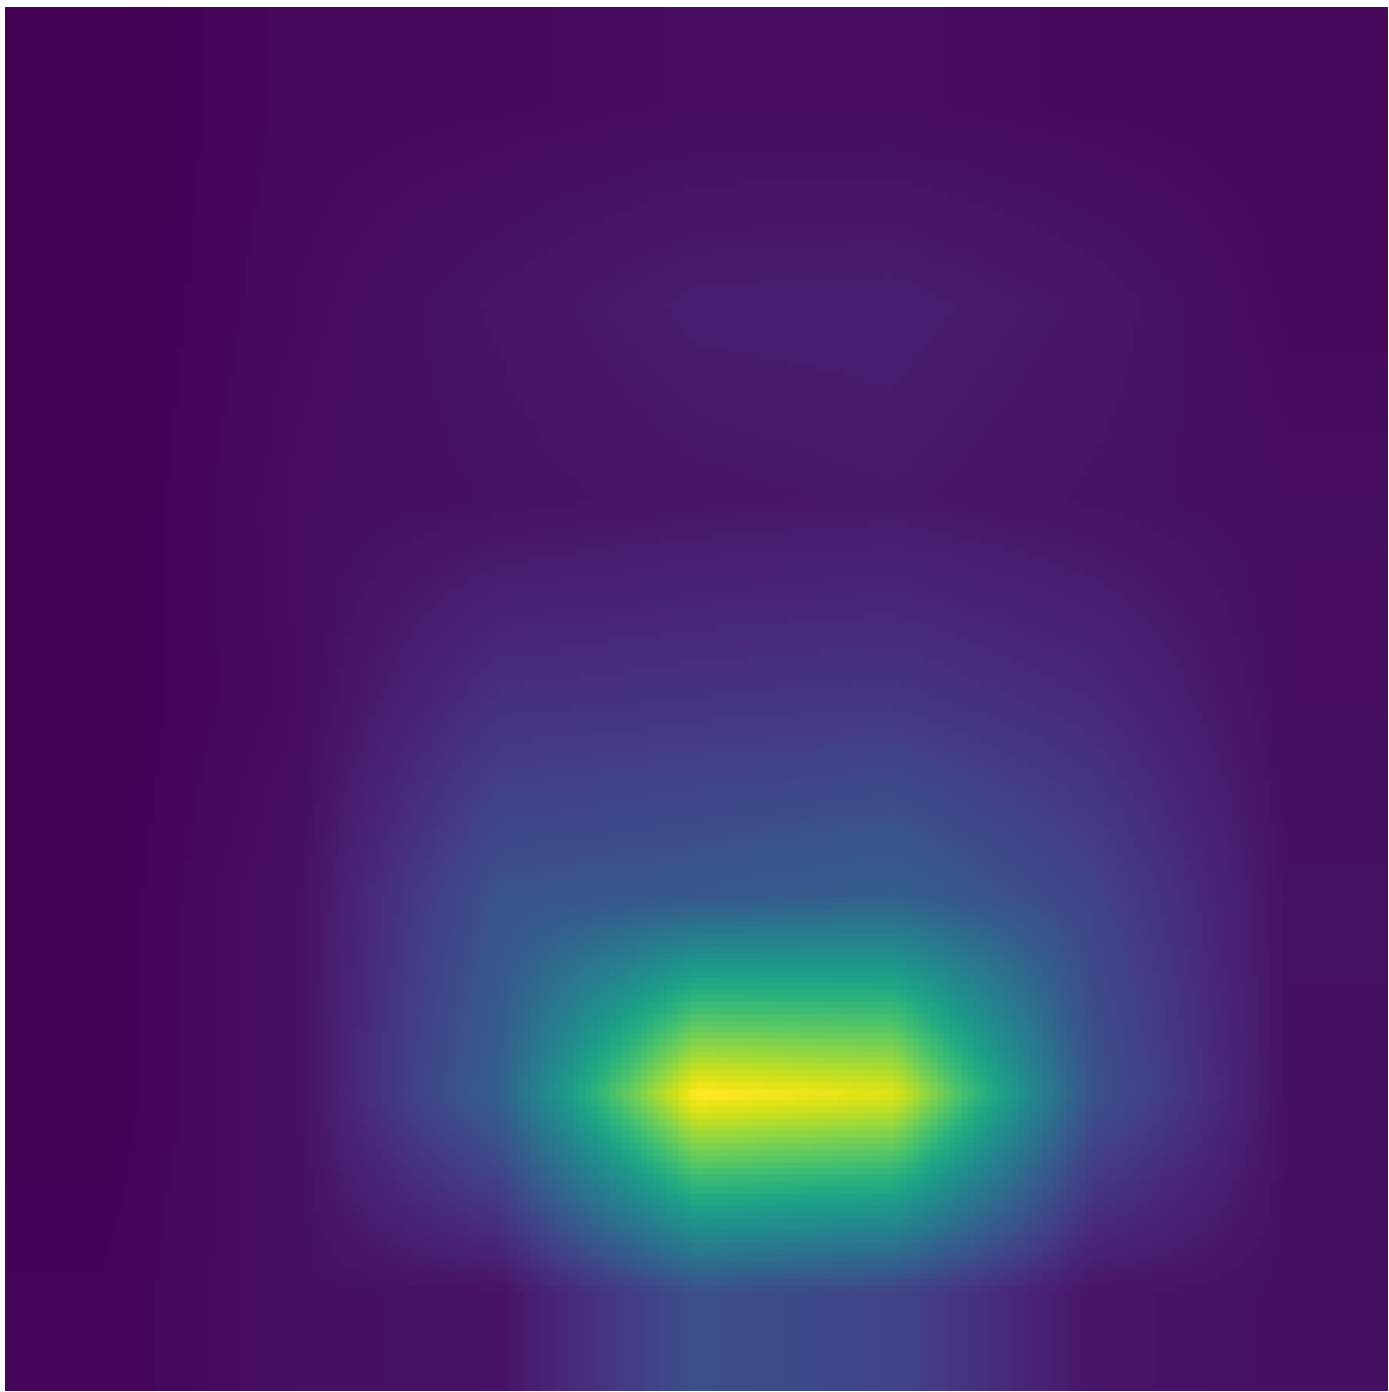

Supplement: Supplementary file 40 [file Serianni_Attention_IoU_Examining_CVPR_2025_supplemental.zip]

GradCAM - Target: all / Arched\_Eyebrows, Subset: all

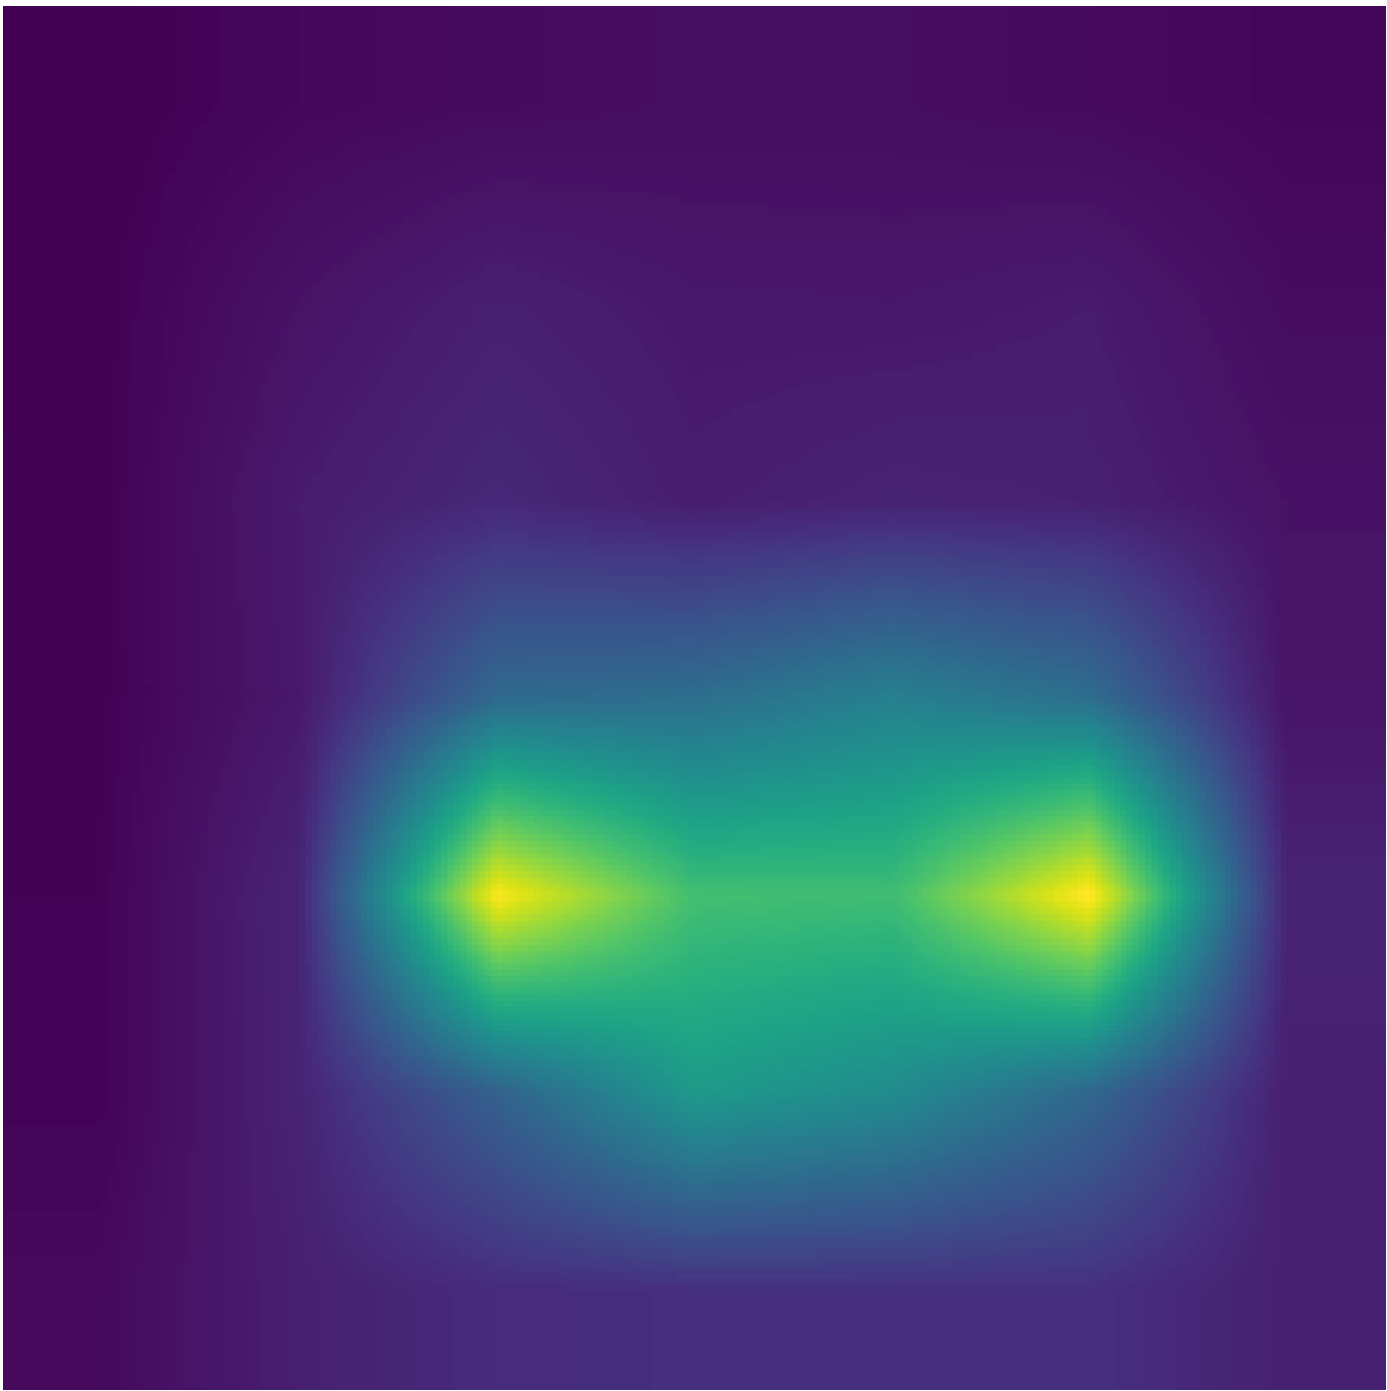

Supplement: Supplementary file 41 [file Serianni_Attention_IoU_Examining_CVPR_2025_supplemental.zip]

GradCAM - Target: all / Rosy\_Cheeks, Subset: all

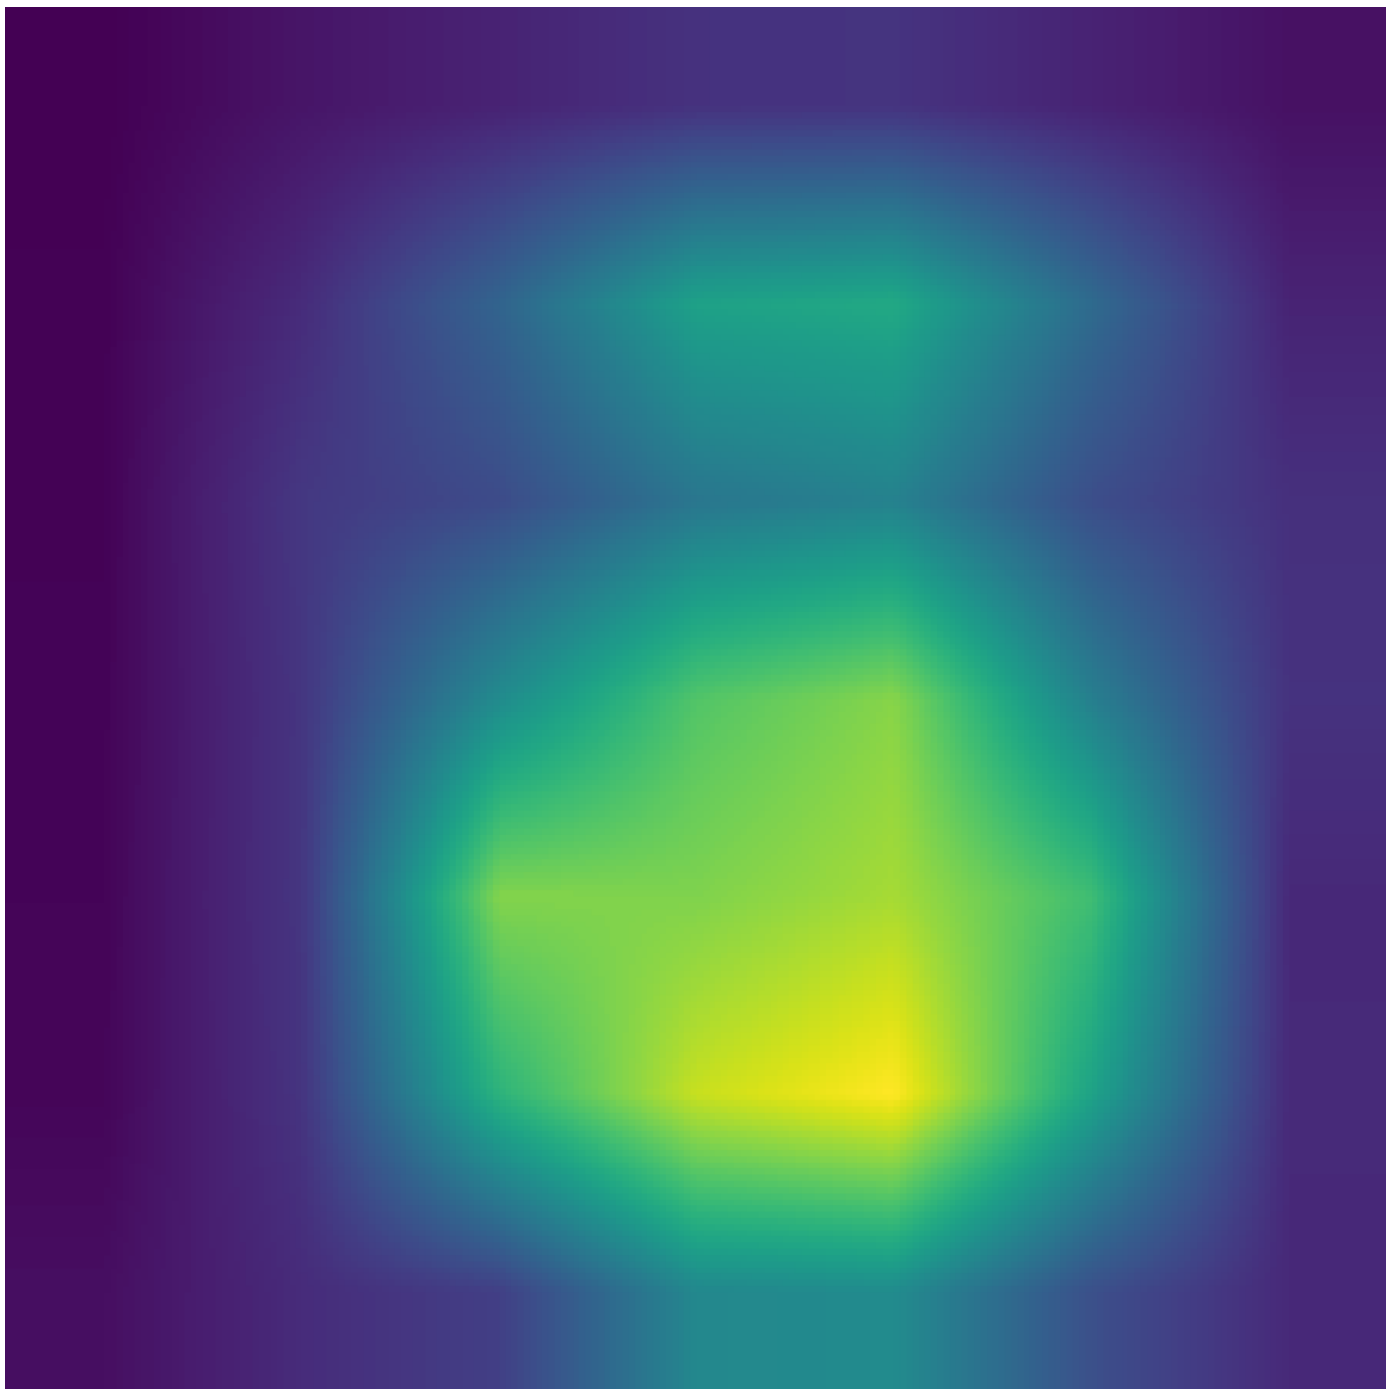

Supplement: Supplementary file 42 [file Serianni_Attention_IoU_Examining_CVPR_2025_supplemental.zip]

GradCAM - Target: all / Big\_Nose, Subset: all

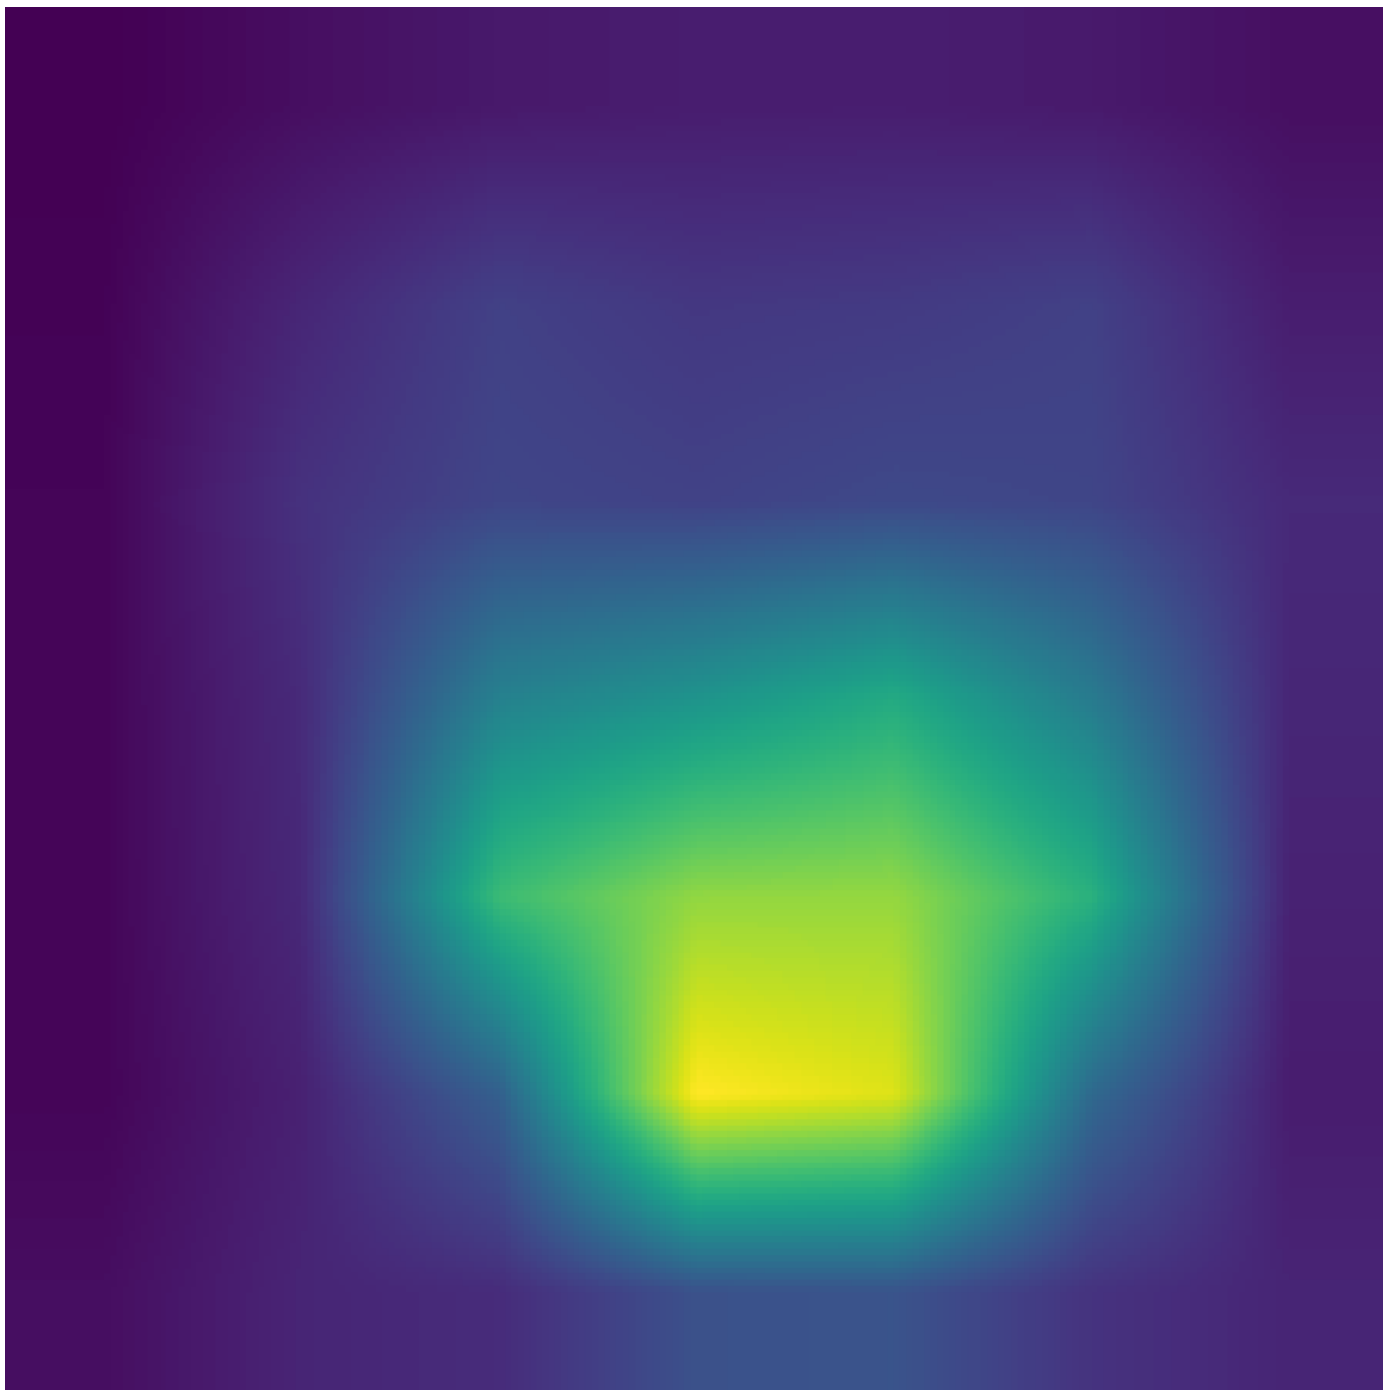

Supplement: Supplementary file 43 [file Serianni_Attention_IoU_Examining_CVPR_2025_supplemental.zip]

GradCAM - Target: all / Bushy\_Eyebrows, Subset: all

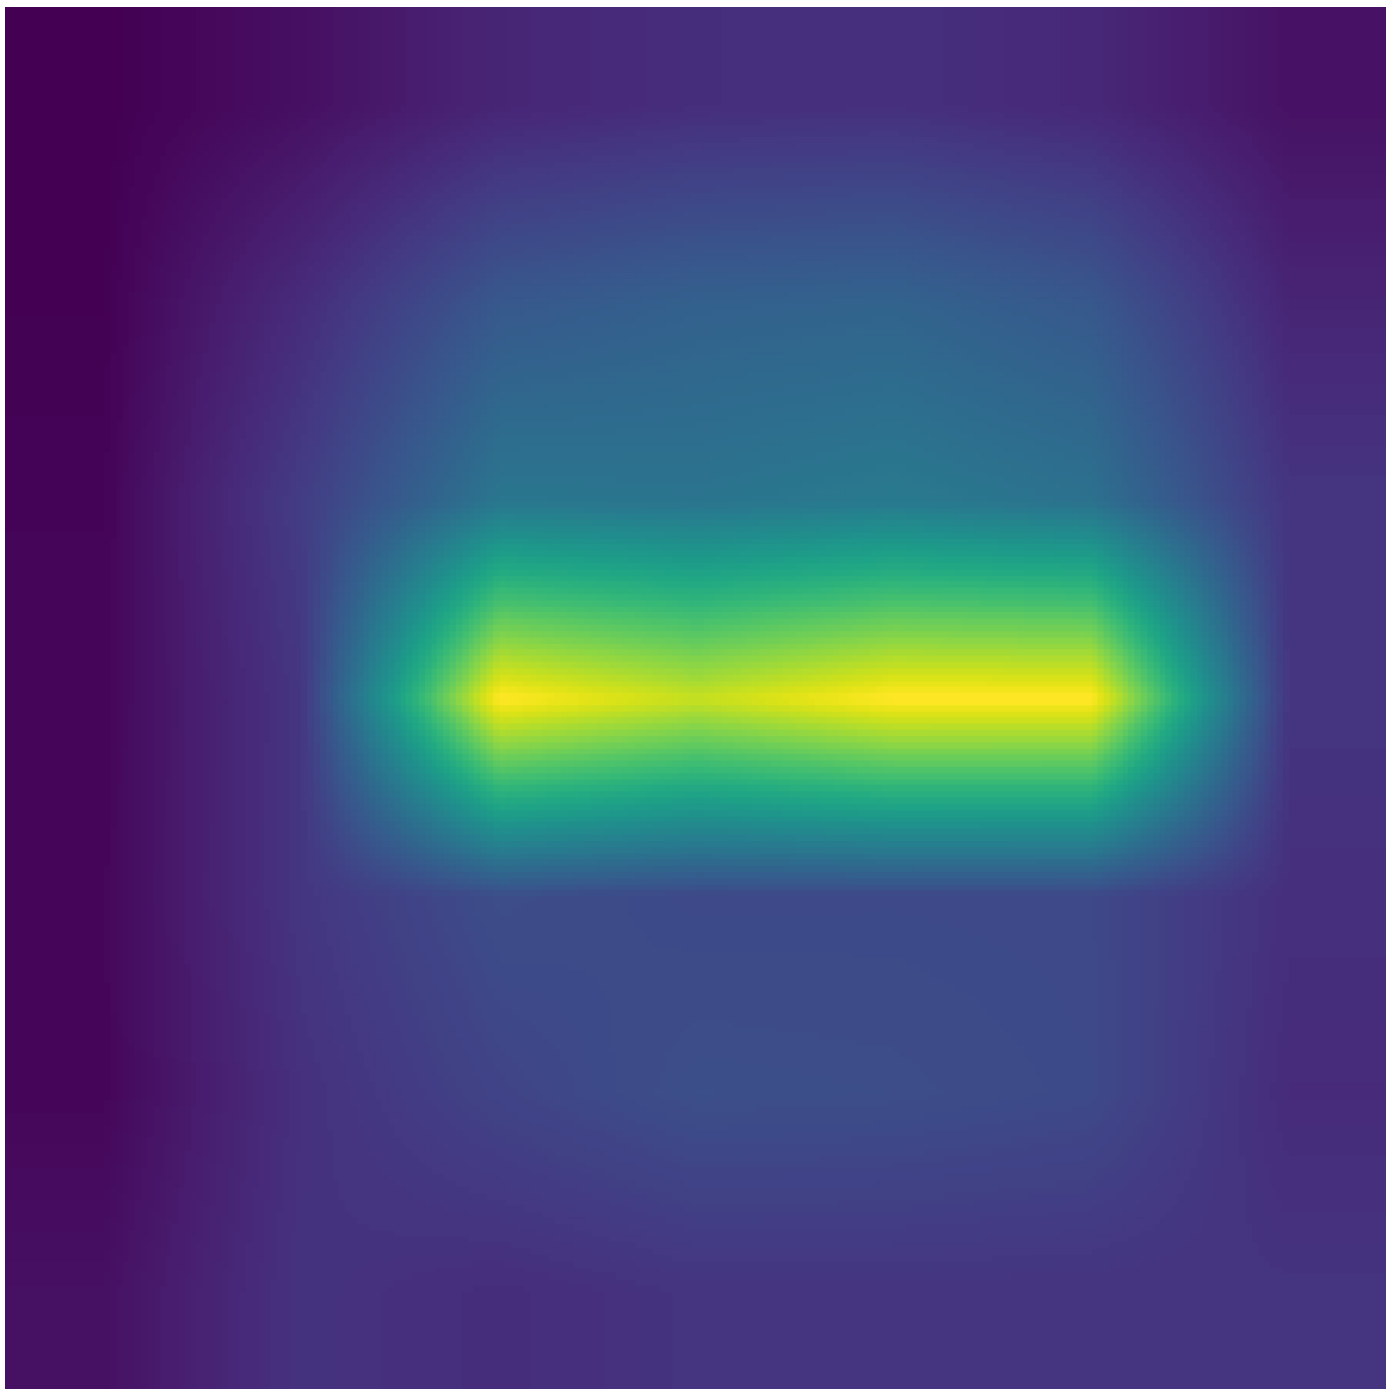

Supplement: Supplementary file 44 [file Serianni_Attention_IoU_Examining_CVPR_2025_supplemental.zip]

# Wavy\_Hair and Male

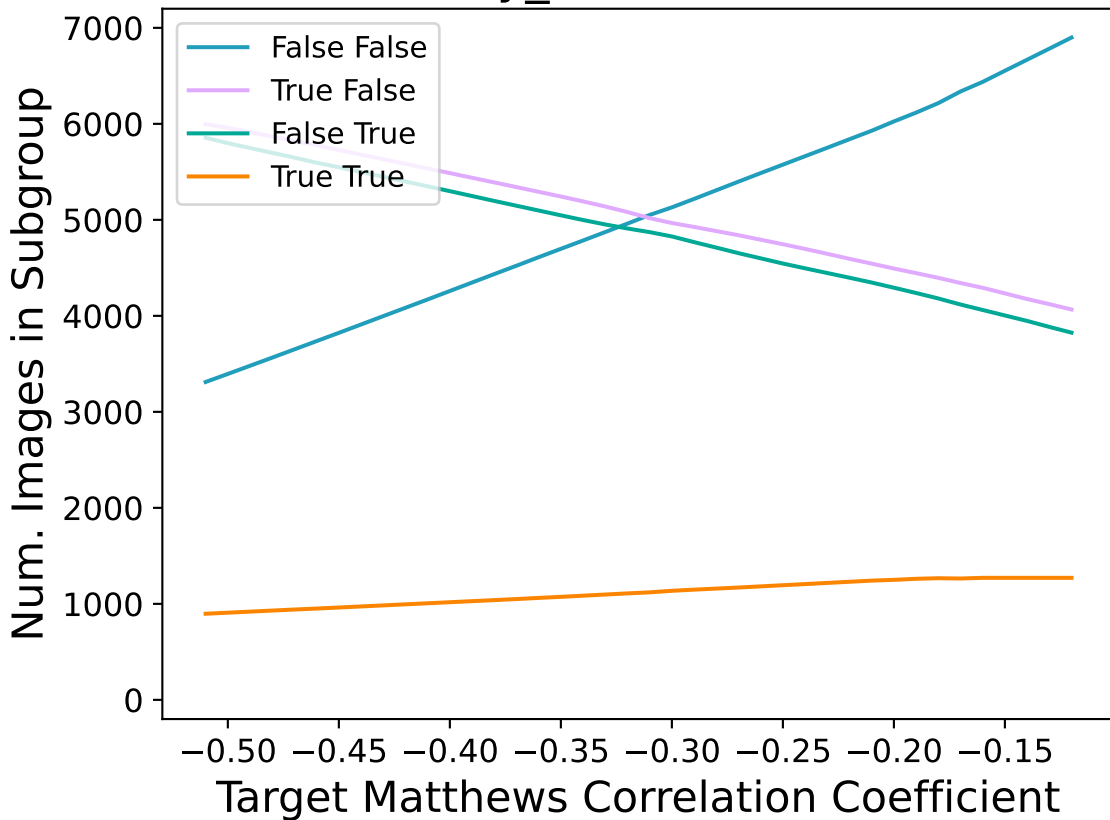

Supplement: Supplementary file 45 [file Serianni_Attention_IoU_Examining_CVPR_2025_supplemental.zip]

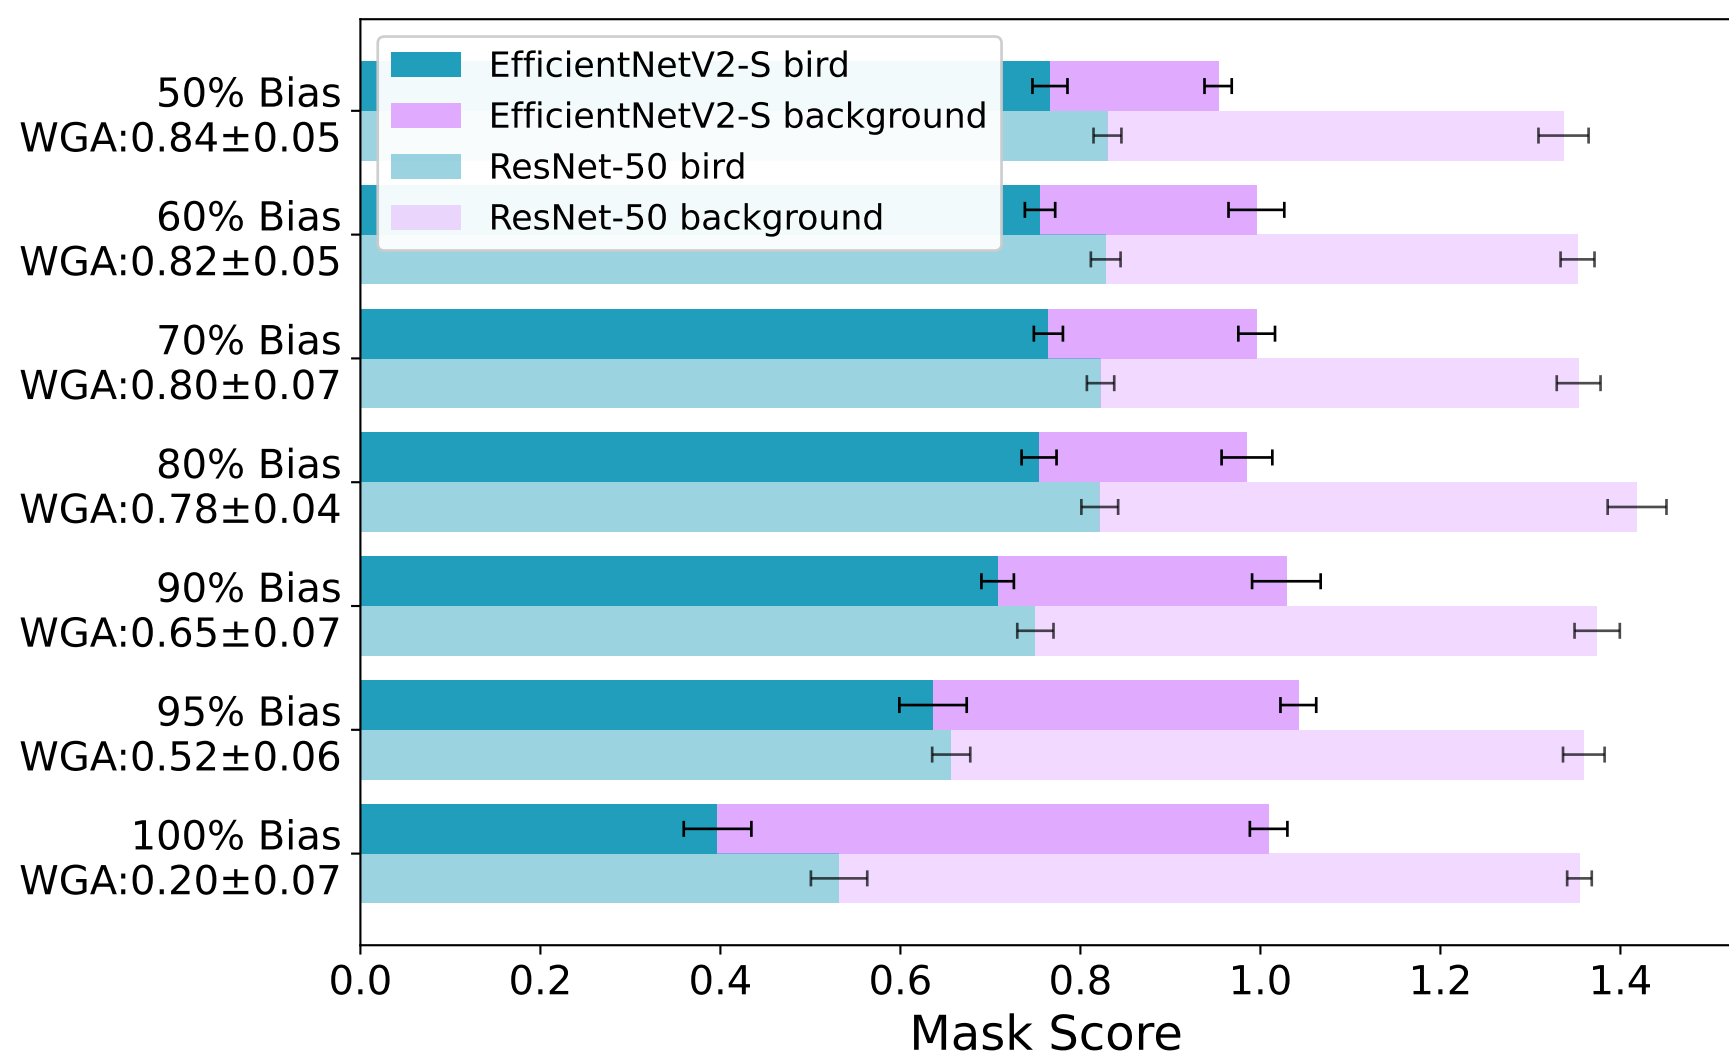

Supplement: Supplementary file 46 [file Serianni_Attention_IoU_Examining_CVPR_2025_supplemental.zip]

GradCAM - Target: all / Big\_Lips, Subset: all

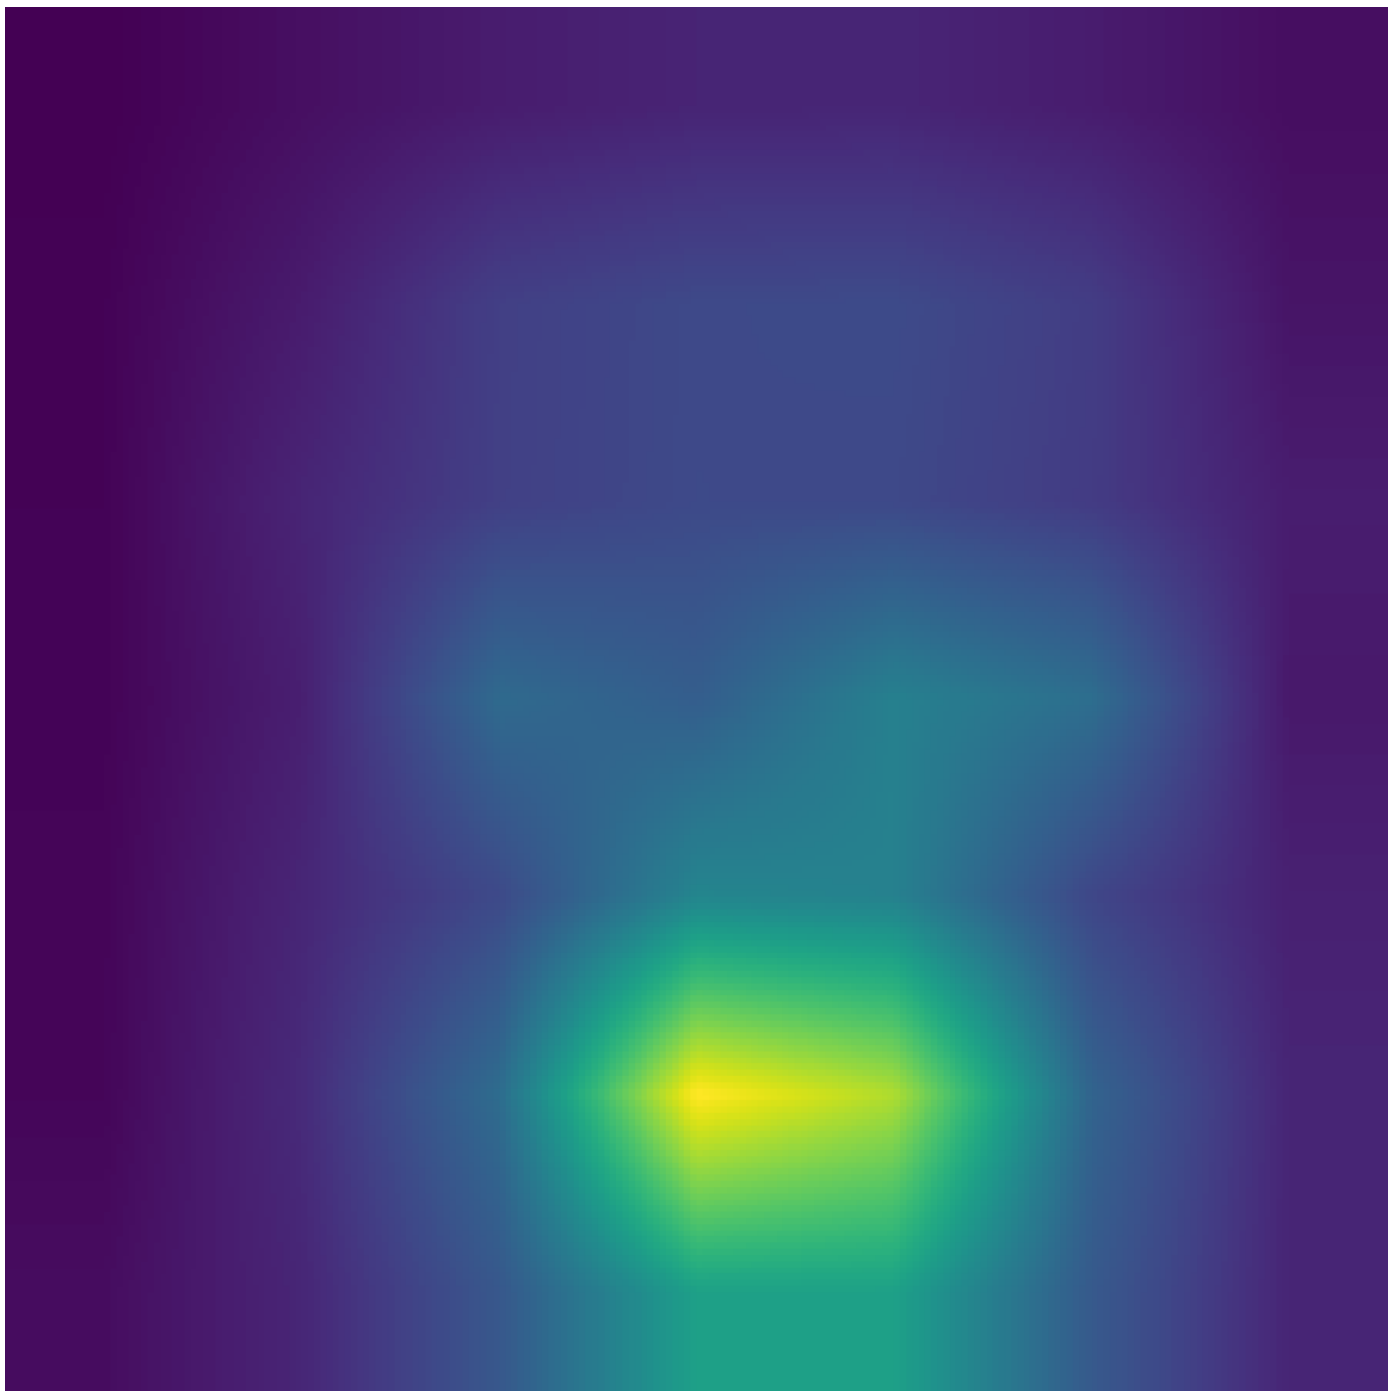

Supplement: Supplementary file 47 [file Serianni_Attention_IoU_Examining_CVPR_2025_supplemental.zip]

GradCAM - Target: all / 5\_o\_Clock\_Shadow, Subset: all

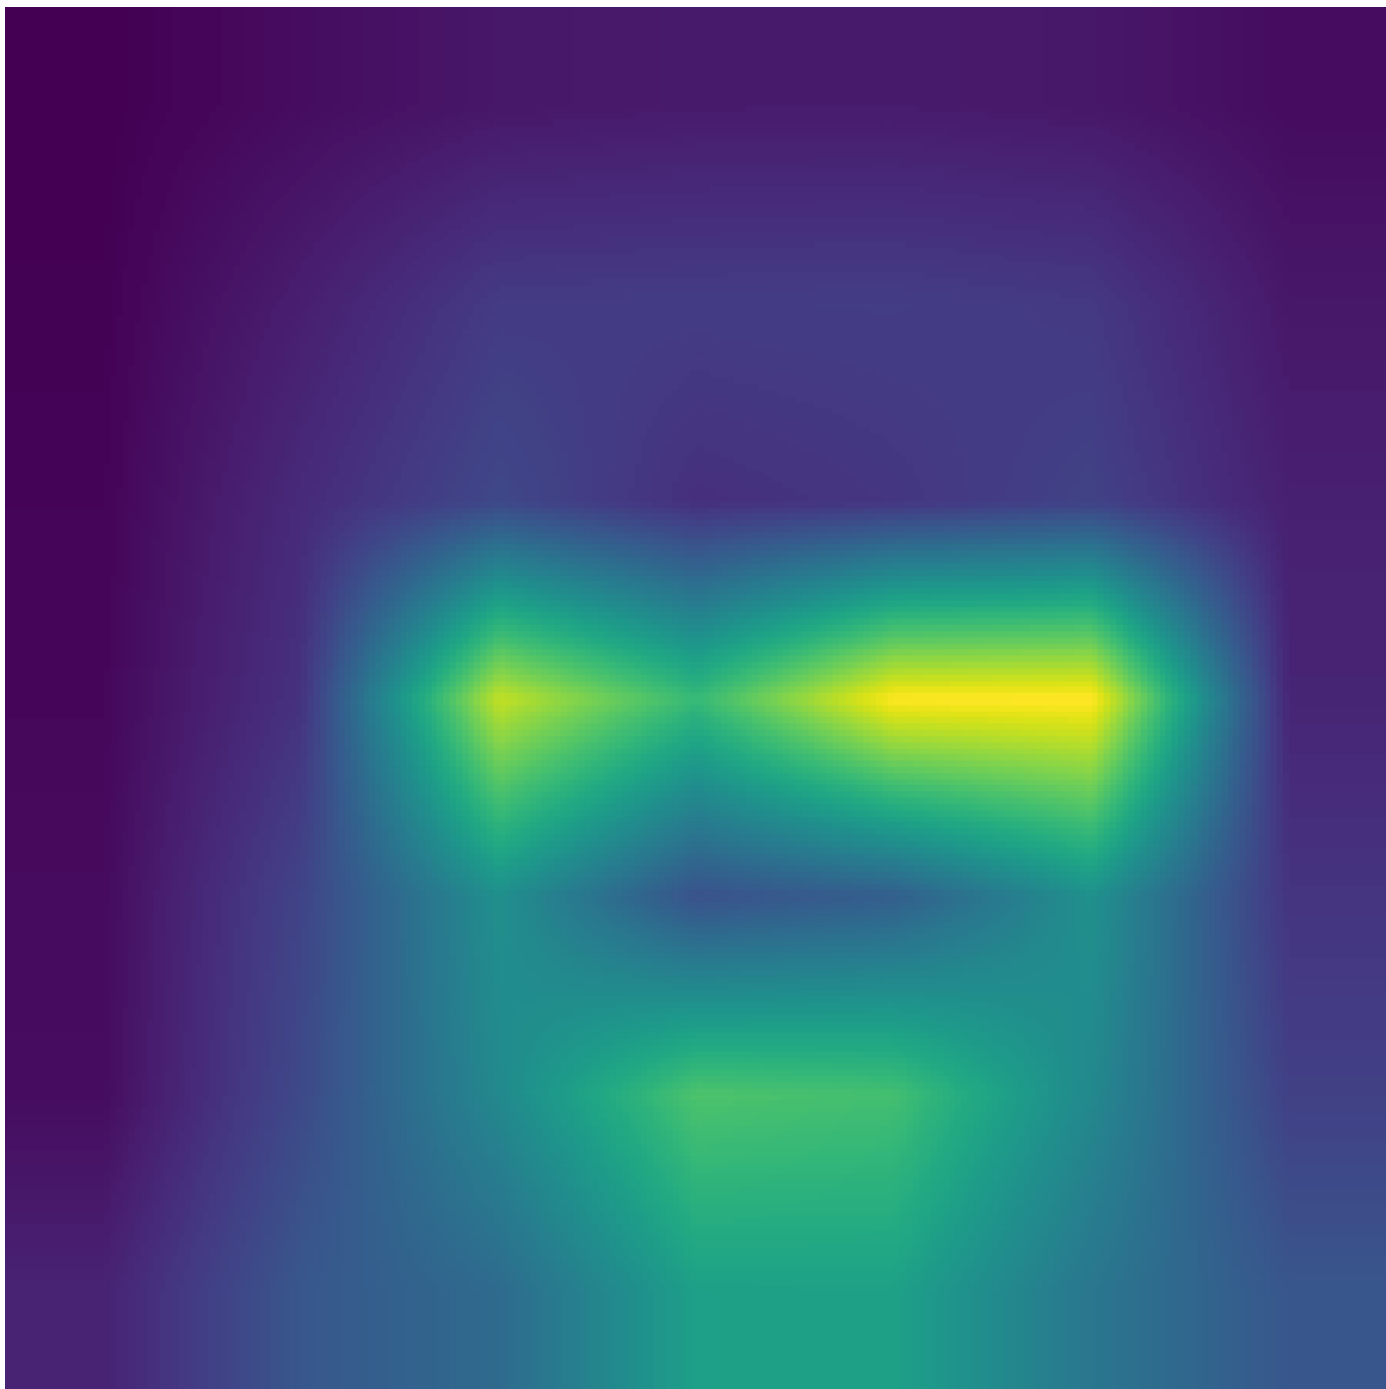

Supplement: Supplementary file 48 [file Serianni_Attention_IoU_Examining_CVPR_2025_supplemental.zip]

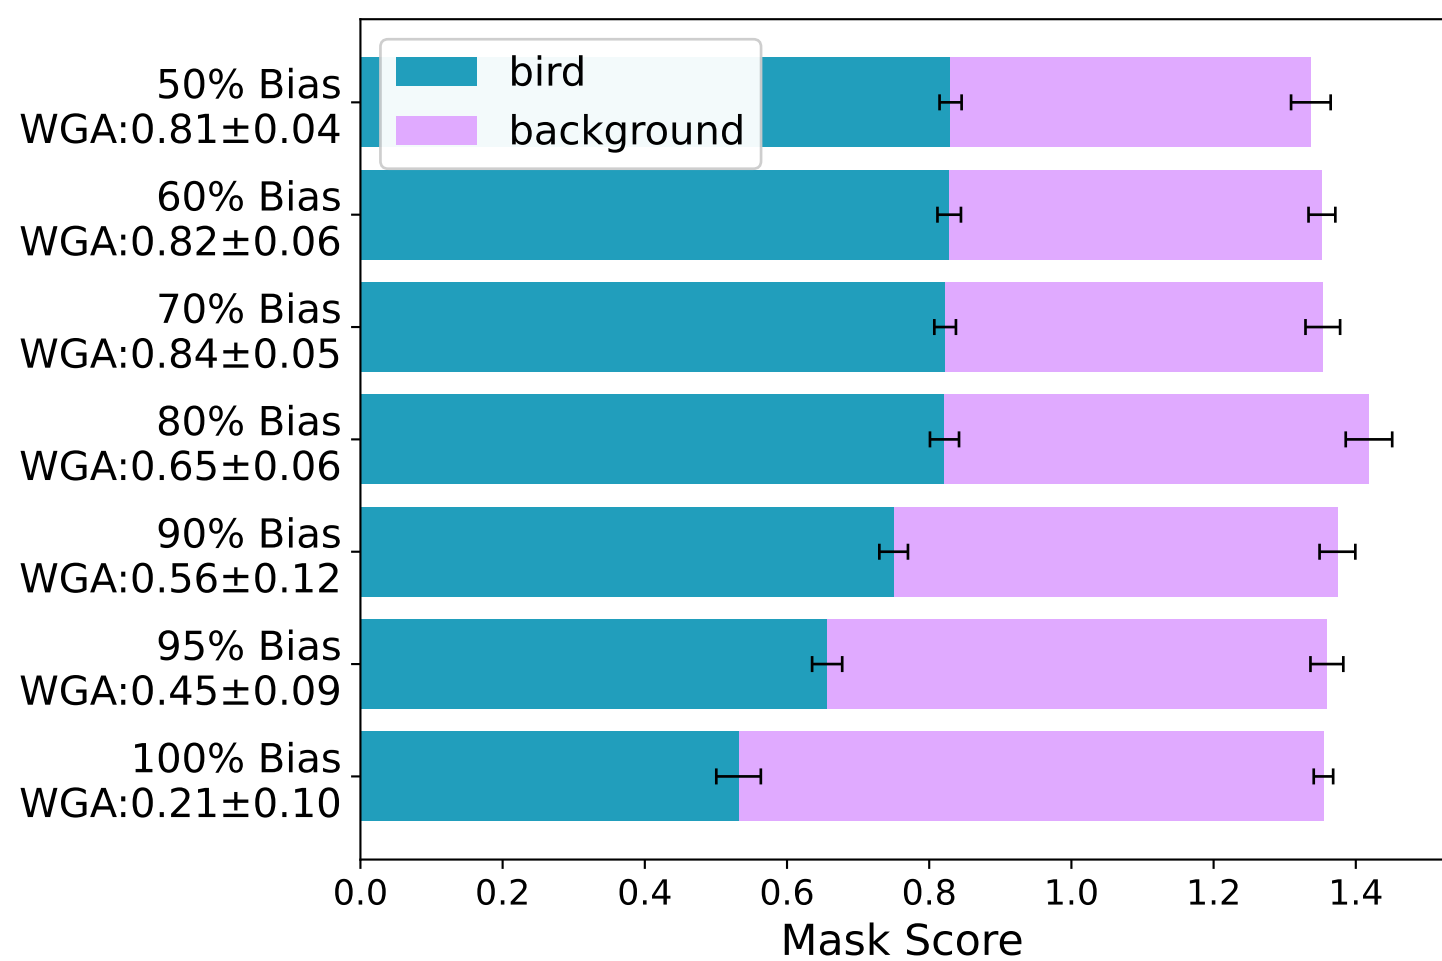

Supplement: Supplementary file 49 [file Serianni_Attention_IoU_Examining_CVPR_2025_supplemental.zip]

GradCAM - Target: all / Young, Subset: all

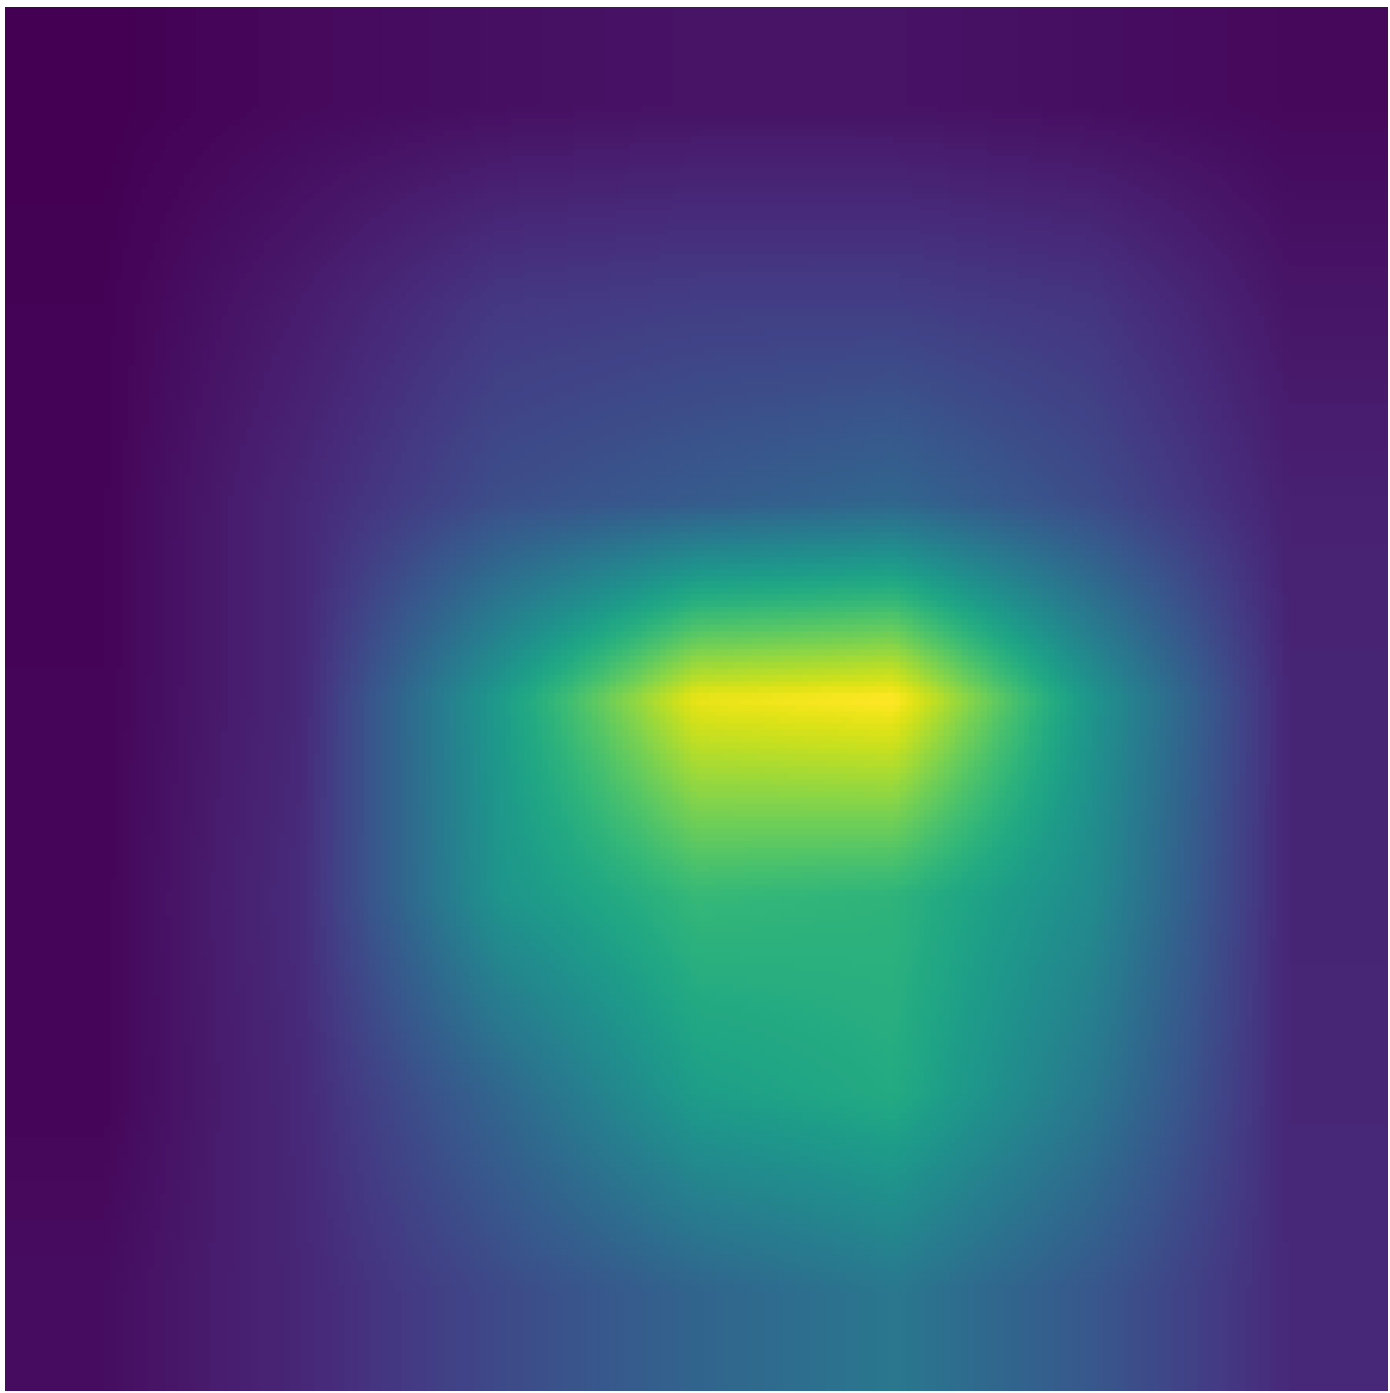

Supplement: Supplementary file 50 [file Serianni_Attention_IoU_Examining_CVPR_2025_supplemental.zip]

GradCAM - Target: all / Receding\_Hairline, Subset: all

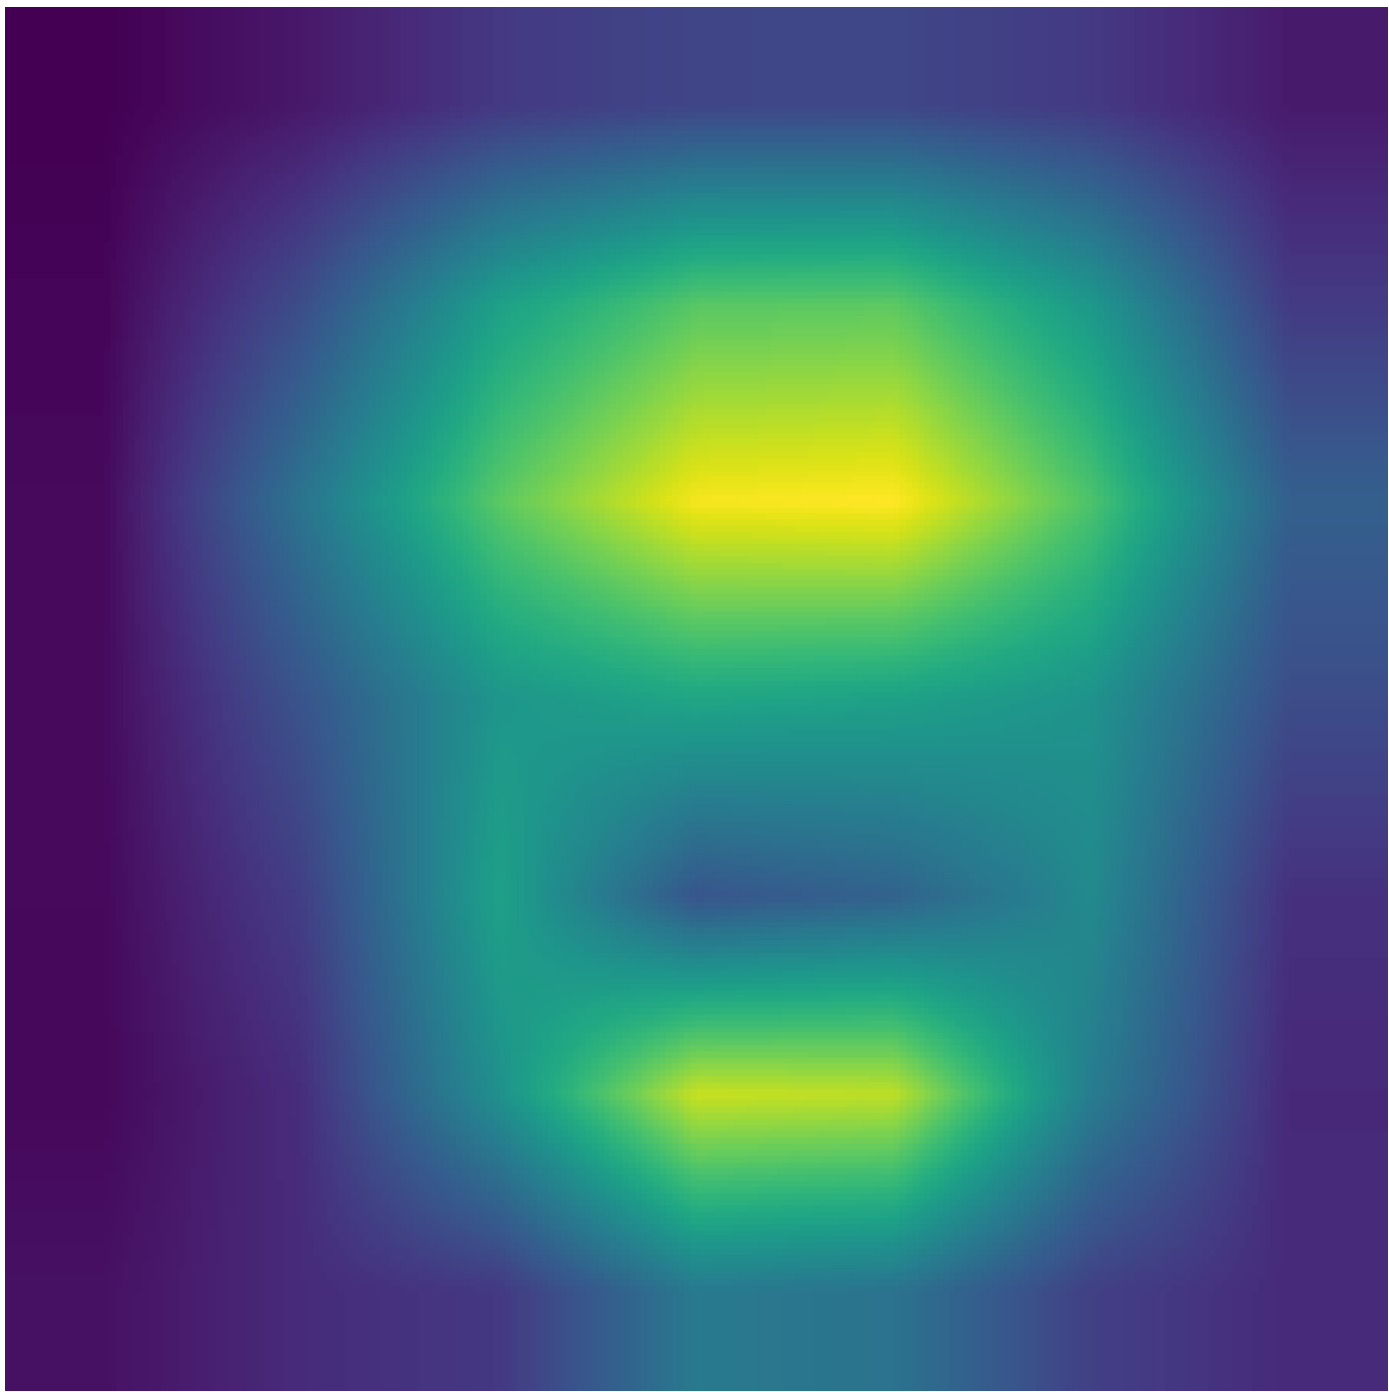

Supplement: Supplementary file 51 [file Serianni_Attention_IoU_Examining_CVPR_2025_supplemental.zip]

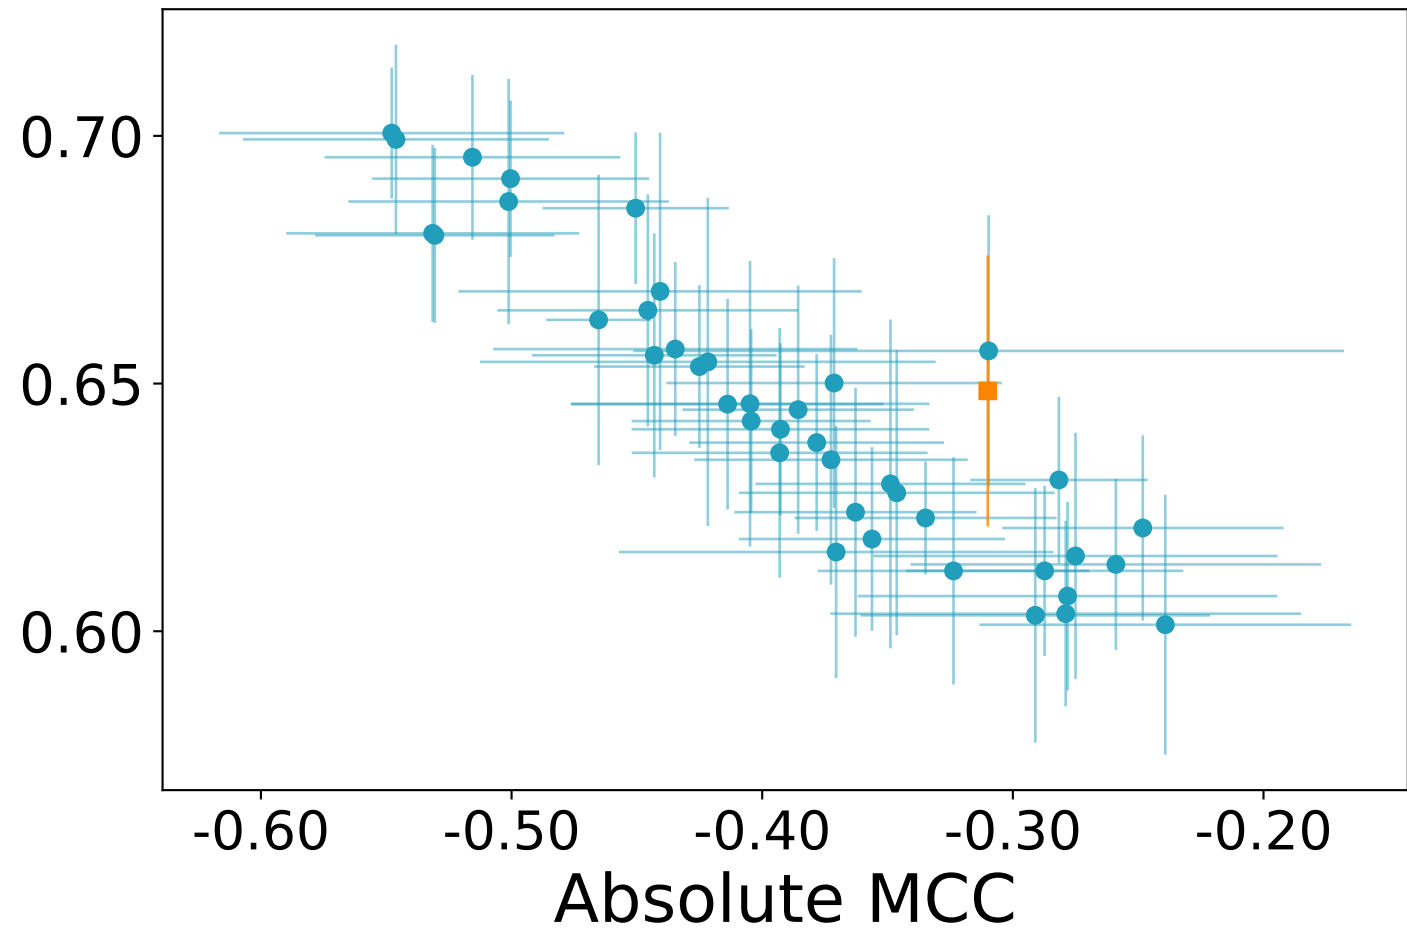

Supplement: Supplementary file 52 [file Serianni_Attention_IoU_Examining_CVPR_2025_supplemental.zip]

GradCAM - Target: all / Arched\_Eyebrows, Subset: all

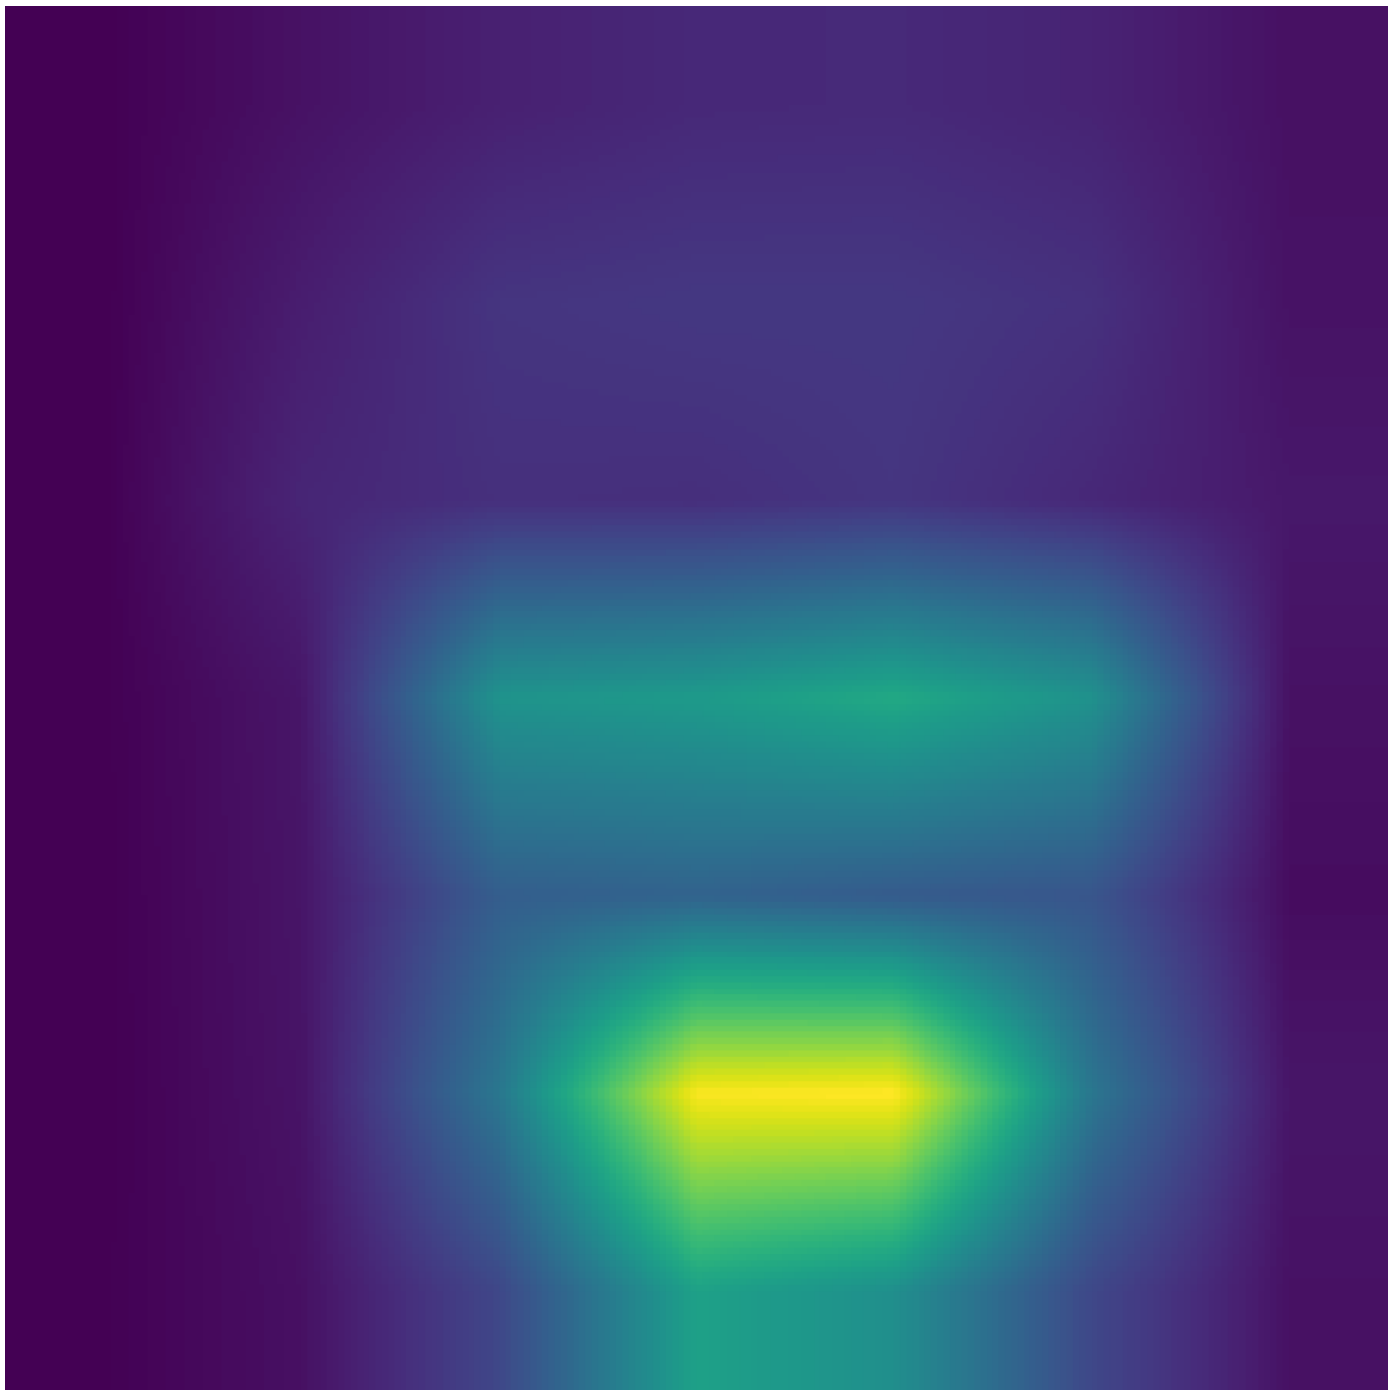

Supplement: Supplementary file 53 [file Serianni_Attention_IoU_Examining_CVPR_2025_supplemental.zip]

GradCAM - Target: all / Wearing\_Earrings, Subset: all

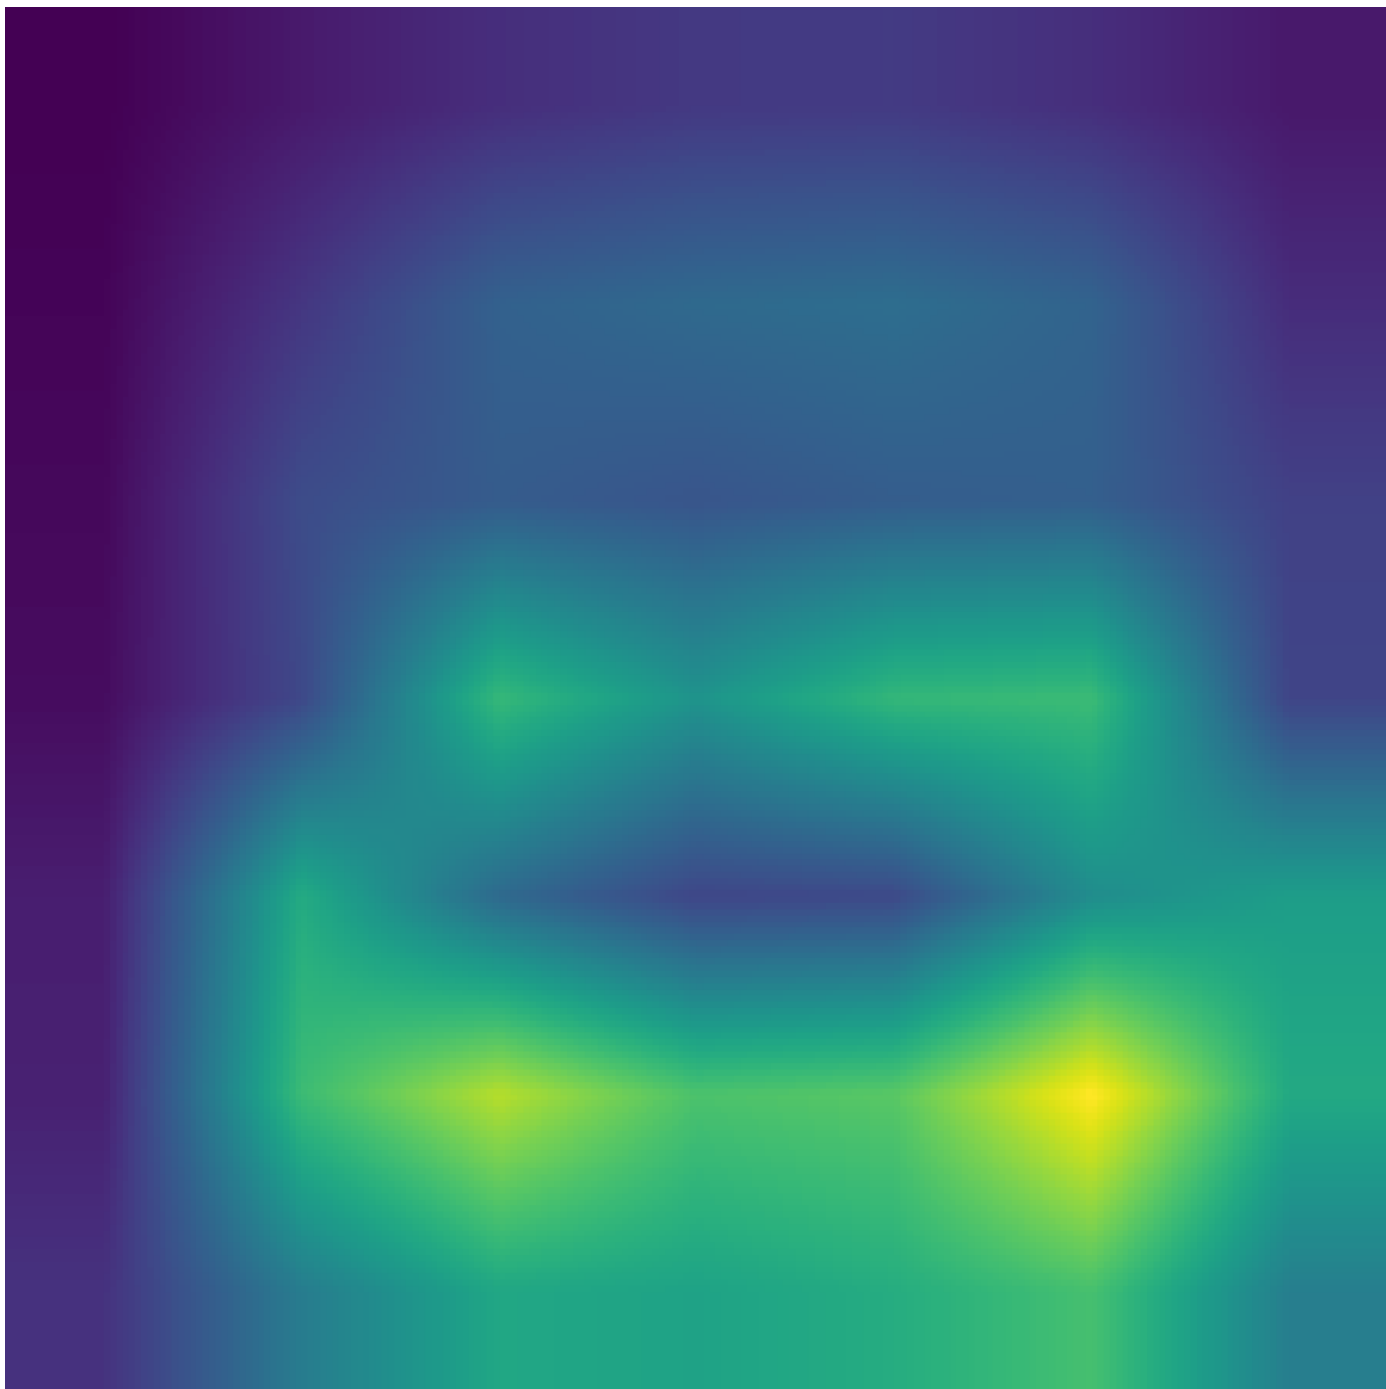

Supplement: Supplementary file 54 [file Serianni_Attention_IoU_Examining_CVPR_2025_supplemental.zip]

GradCAM - Target: all / Narrow\_Eyes, Subset: all

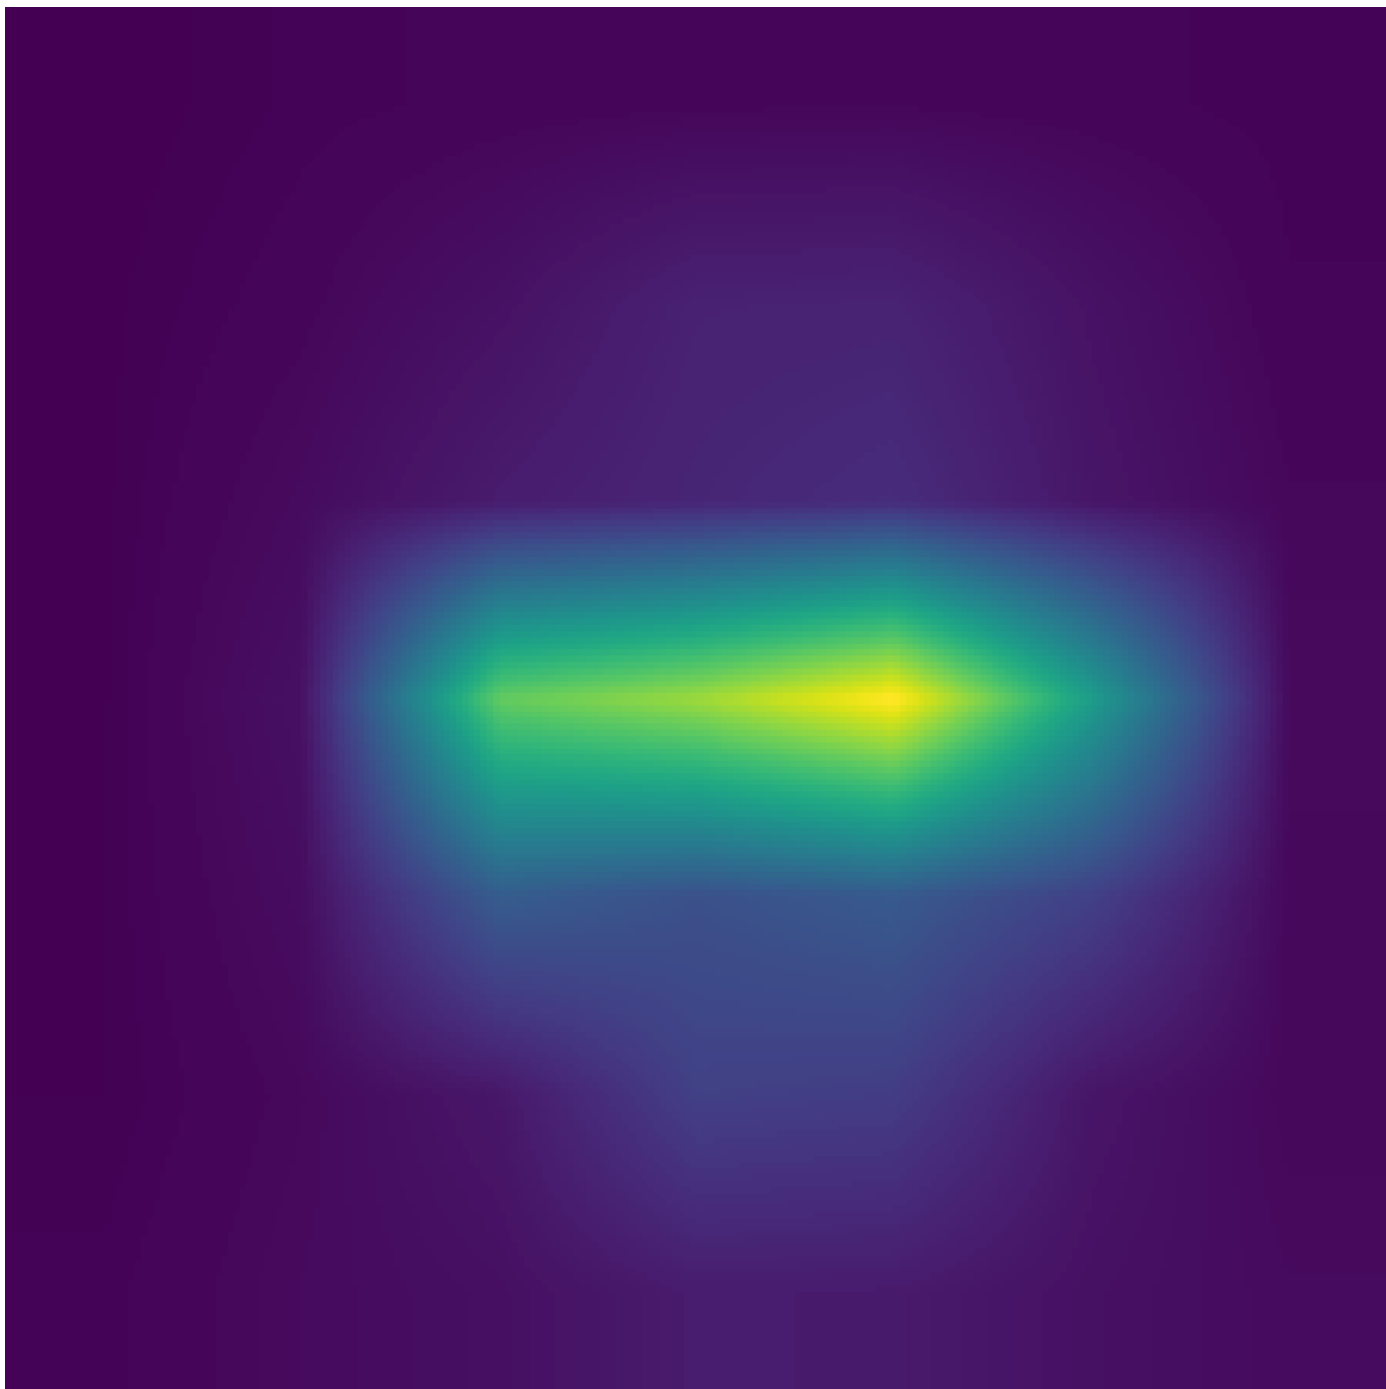

Supplement: Supplementary file 55 [file Serianni_Attention_IoU_Examining_CVPR_2025_supplemental.zip]

GradCAM - Target: all / Wearing\_Hat, Subset: all

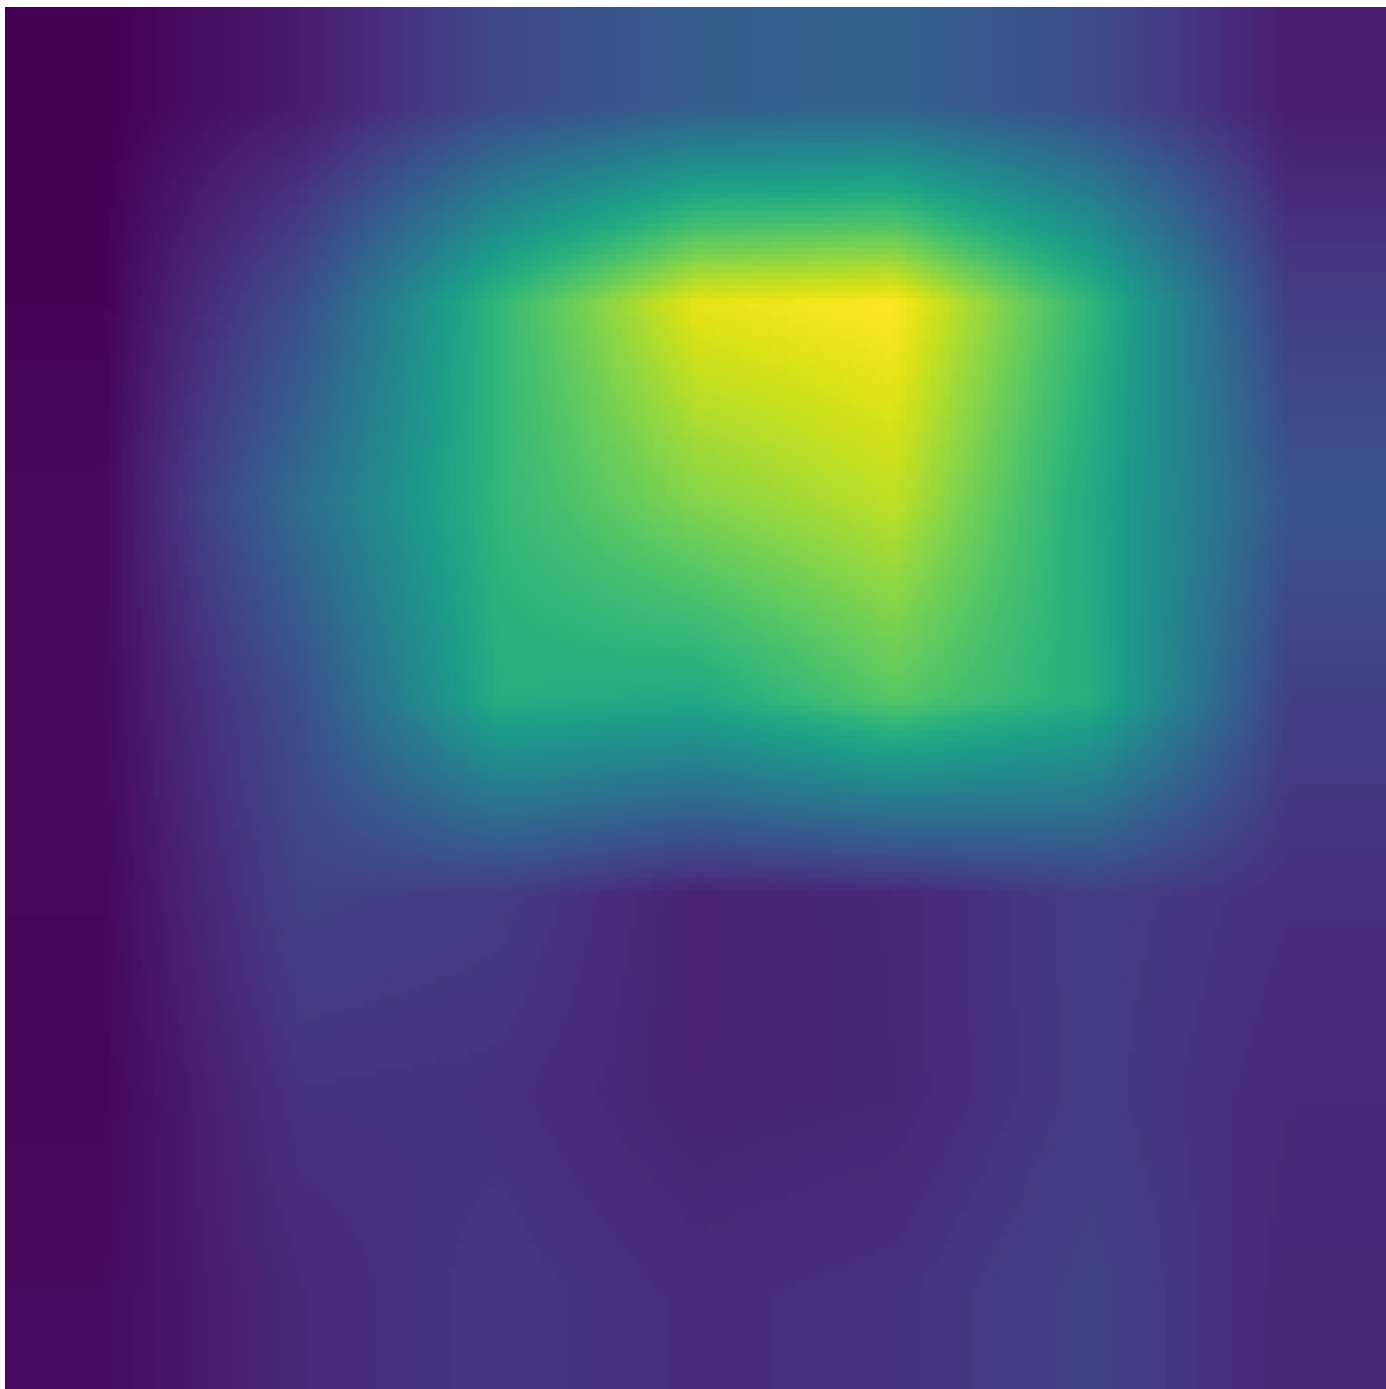

Supplement: Supplementary file 56 [file Serianni_Attention_IoU_Examining_CVPR_2025_supplemental.zip]

GradCAM - Target: all / Arched\_Eyebrows, Subset: all

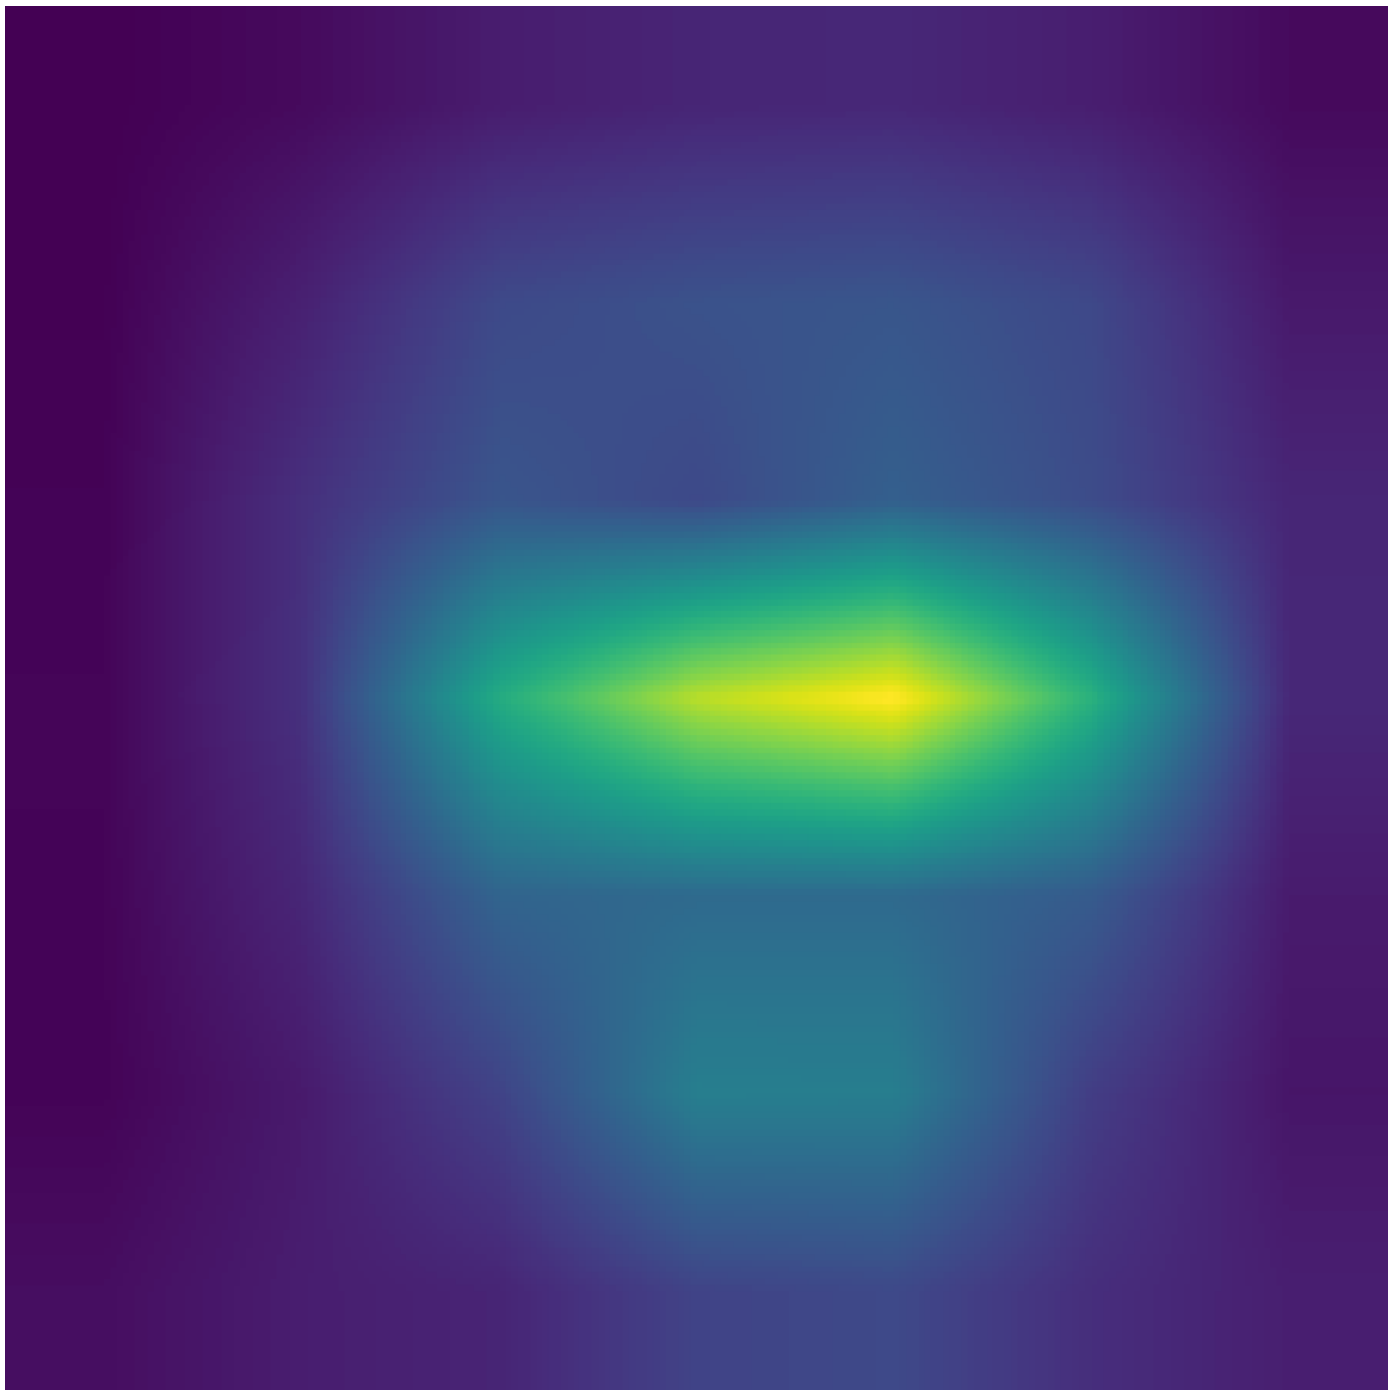

Supplement: Supplementary file 57 [file Serianni_Attention_IoU_Examining_CVPR_2025_supplemental.zip]

GradCAM - Target: all / Wearing\_Lipstick, Subset: all

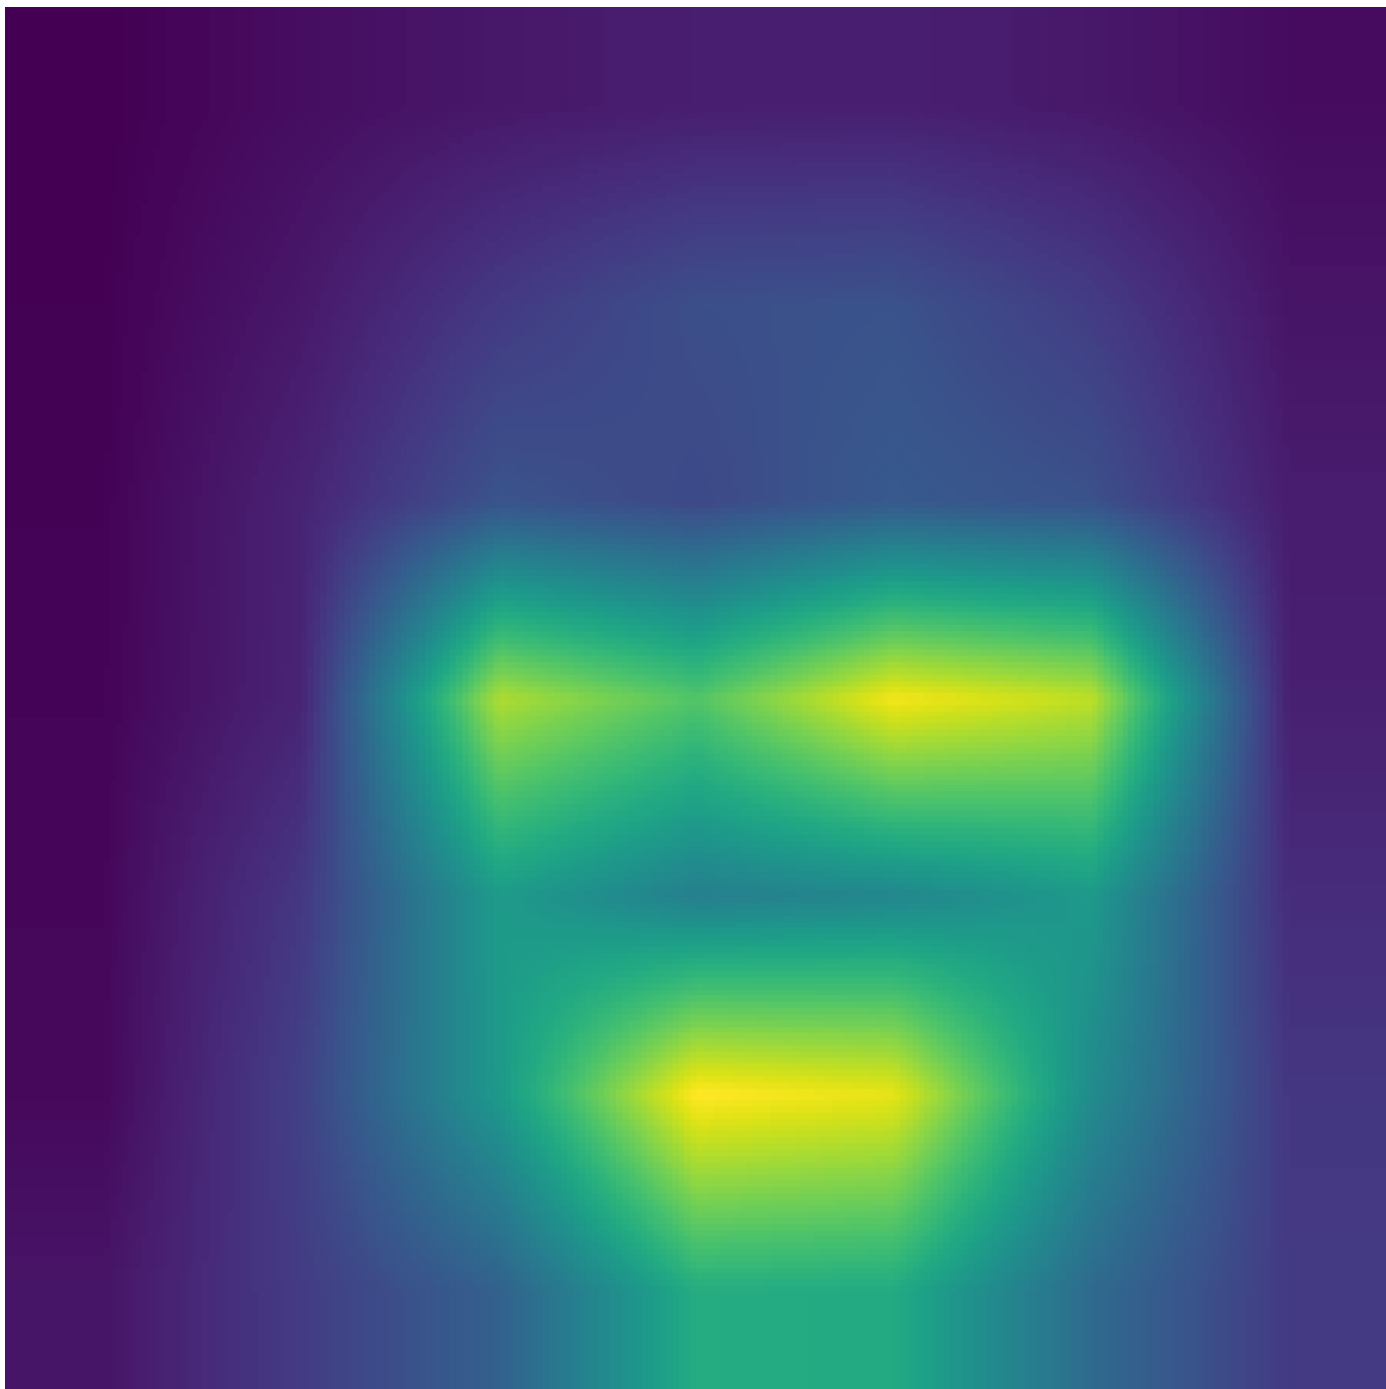

Supplement: Supplementary file 58 [file Serianni_Attention_IoU_Examining_CVPR_2025_supplemental.zip]

GradCAM - Target: all / 5\_o\_Clock\_Shadow, Subset: all

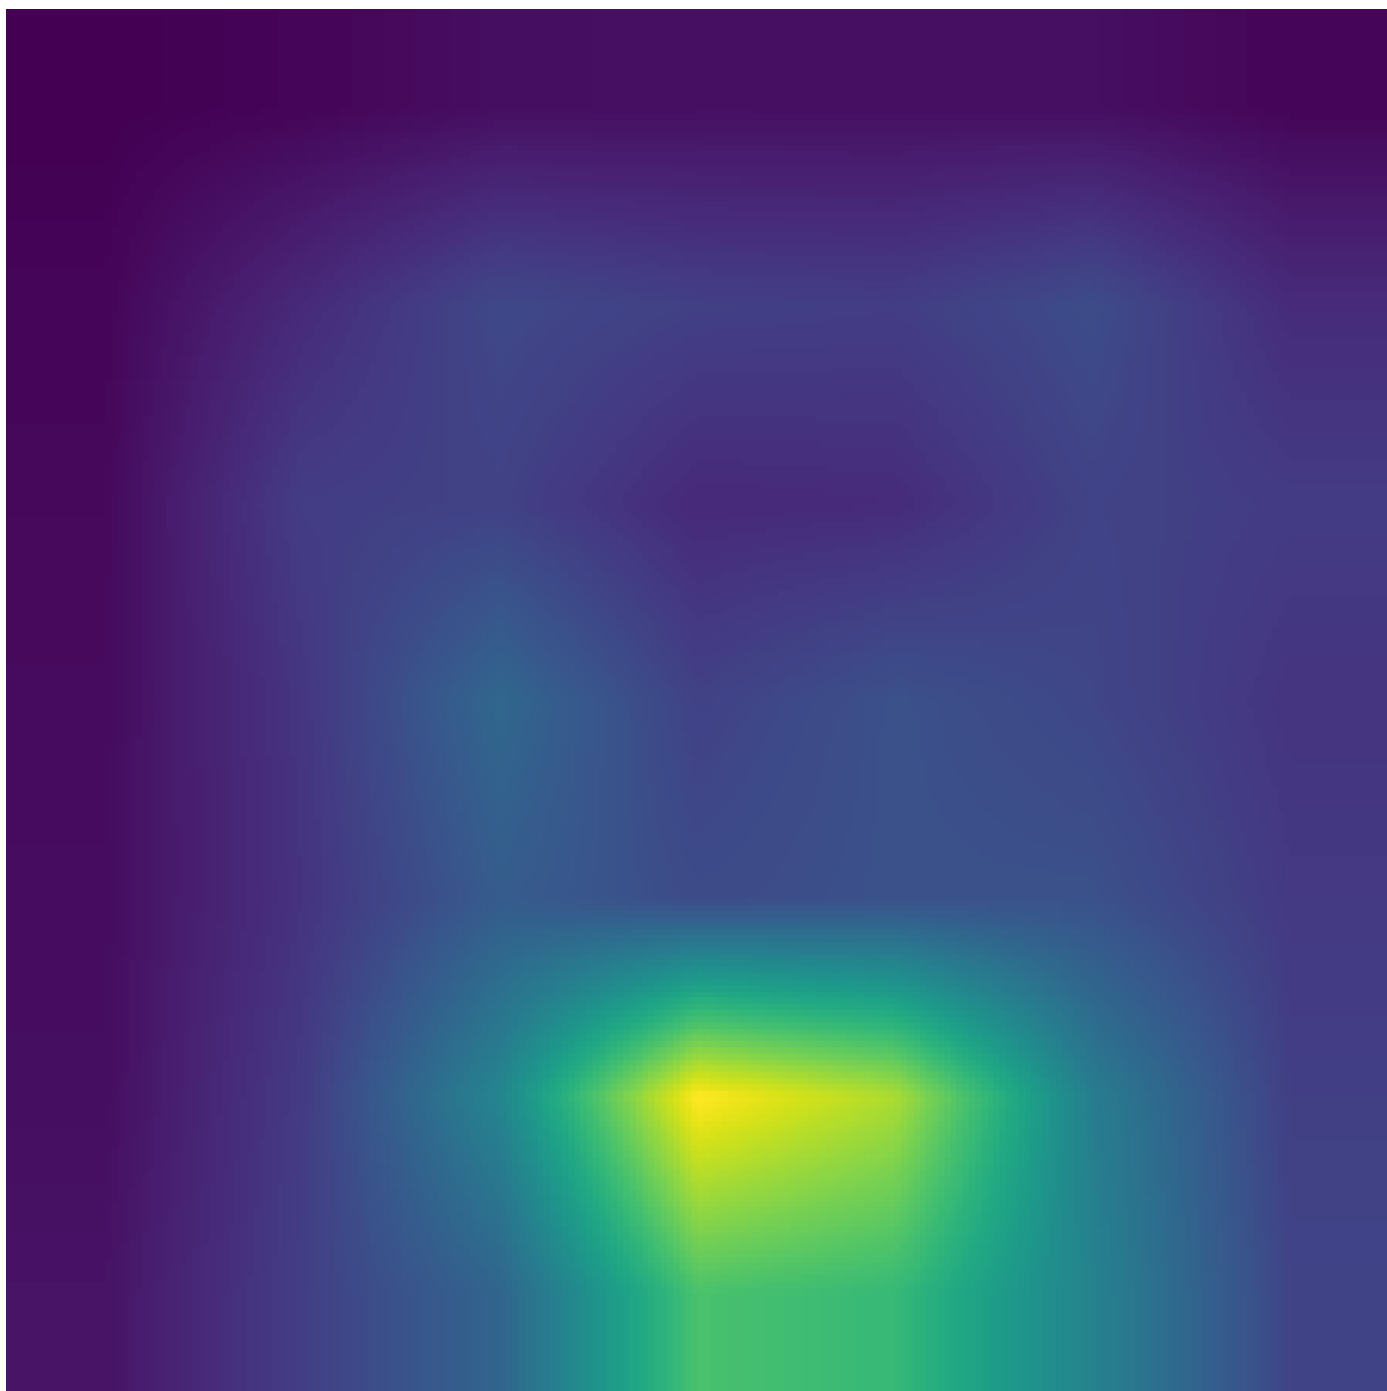

Supplement: Supplementary file 59 [file Serianni_Attention_IoU_Examining_CVPR_2025_supplemental.zip]

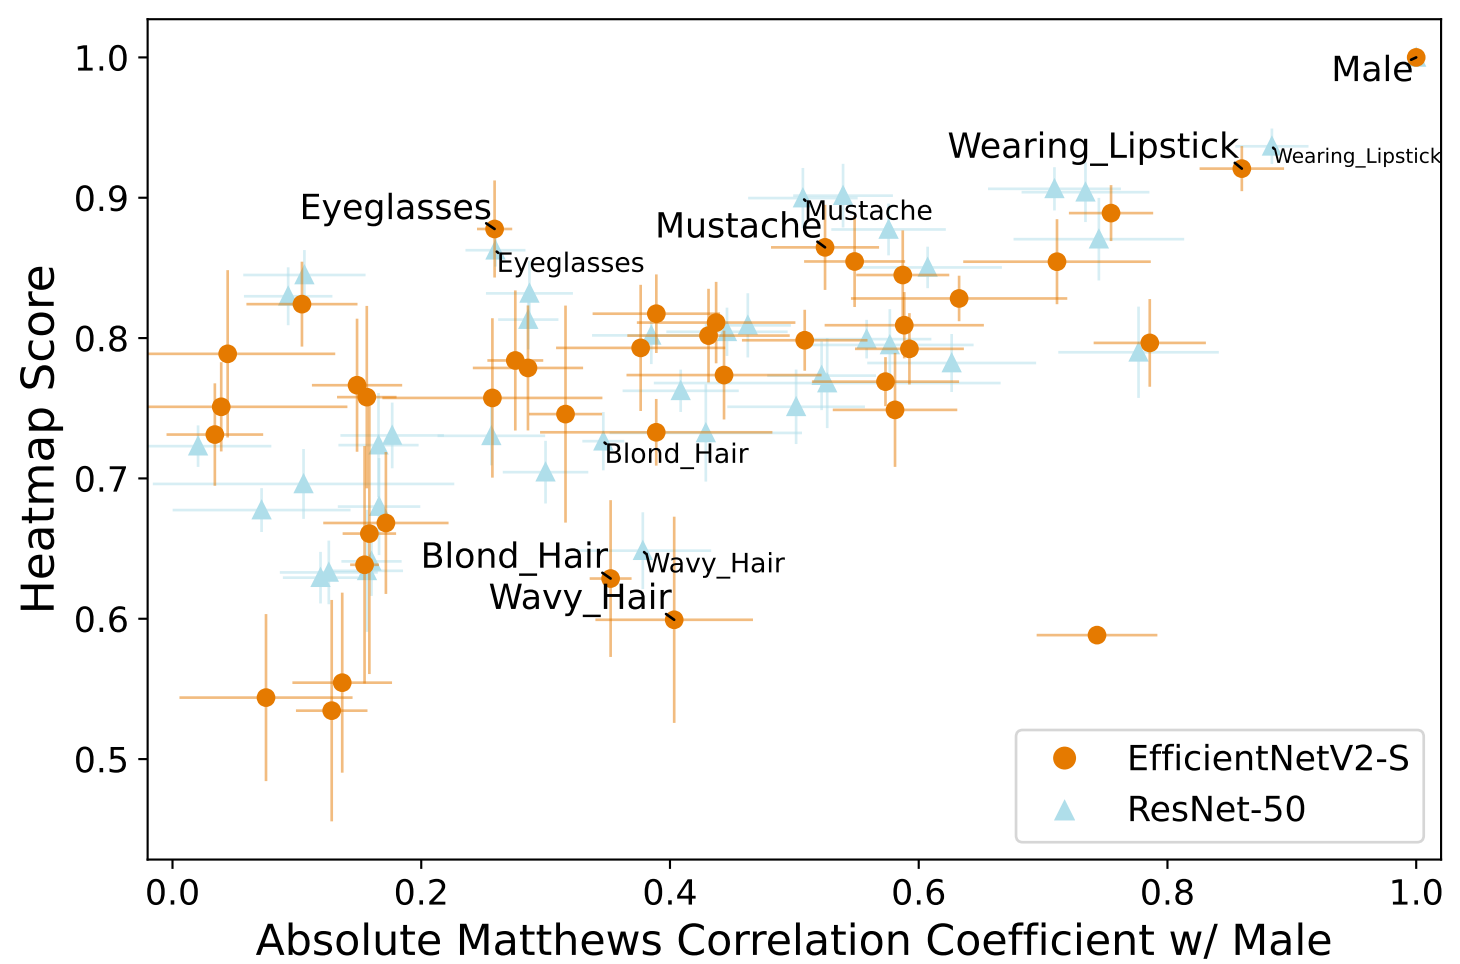

Supplement: Supplementary file 60 [file Serianni_Attention_IoU_Examining_CVPR_2025_supplemental.zip]

GradCAM - Target: all / Arched\_Eyebrows, Subset: all

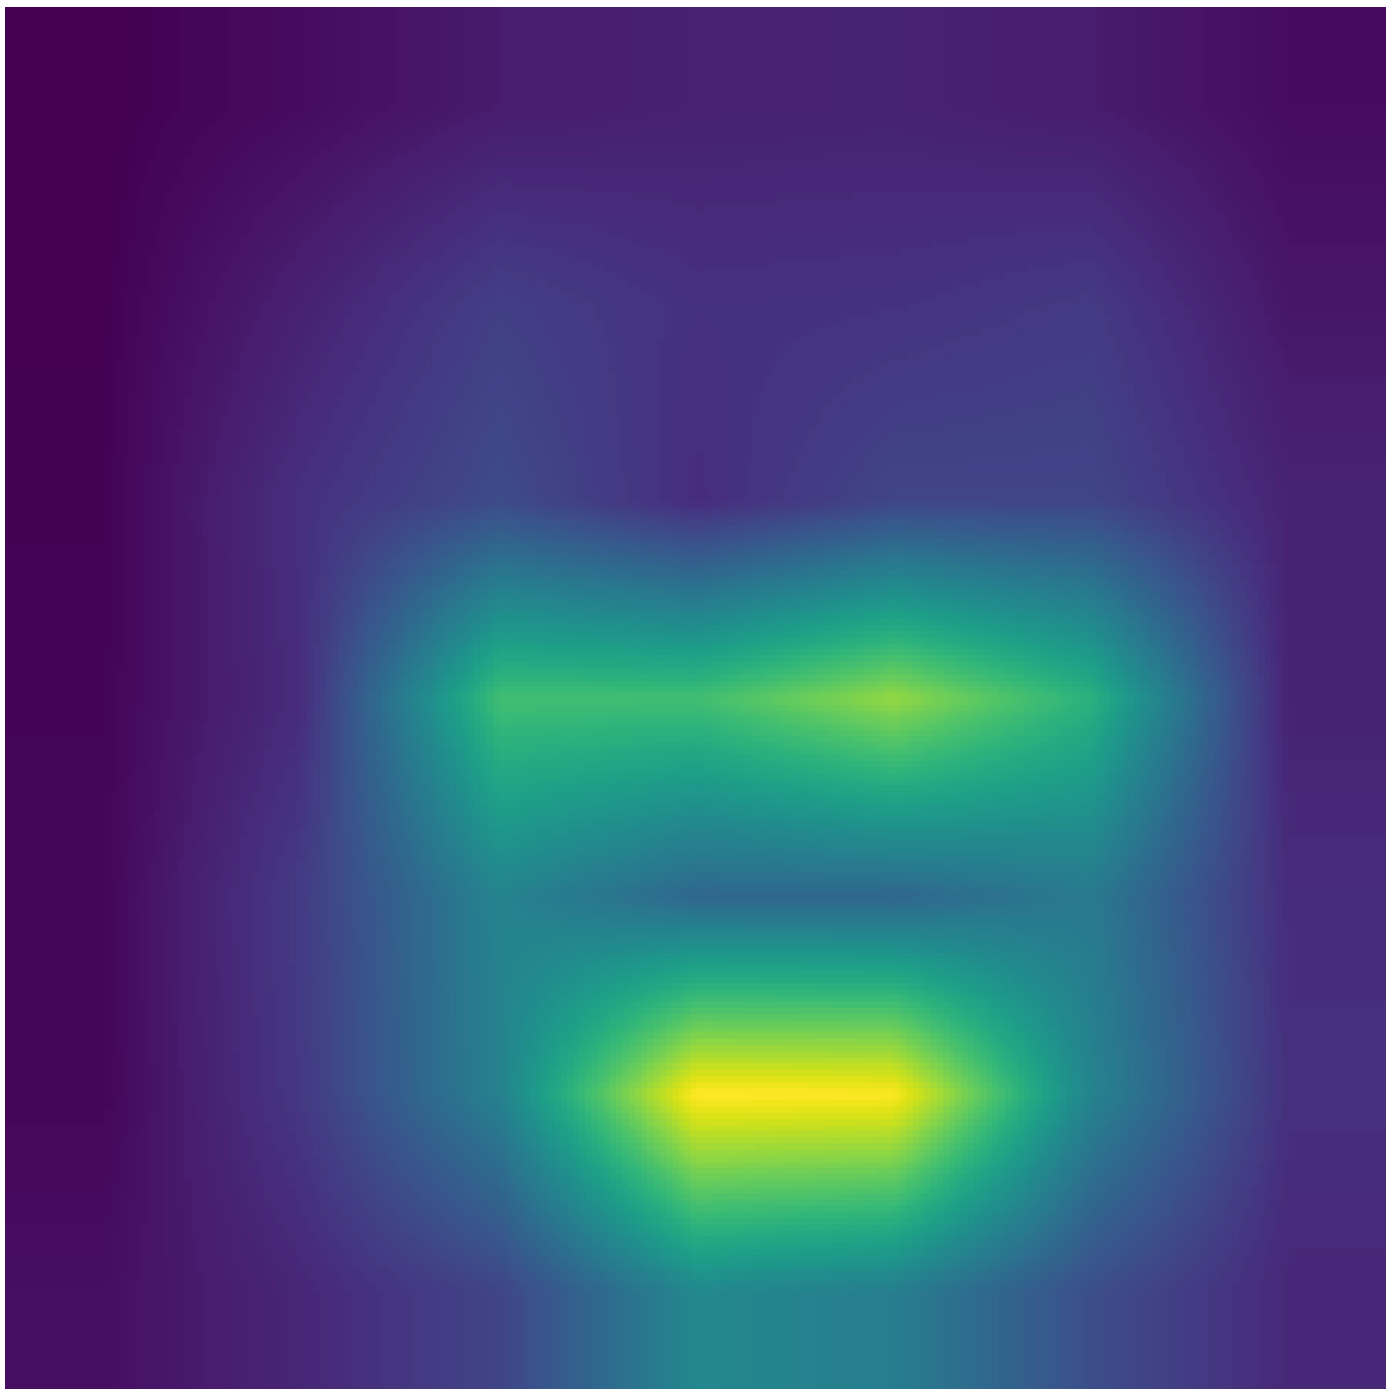

Supplement: Supplementary file 61 [file Serianni_Attention_IoU_Examining_CVPR_2025_supplemental.zip]
